# Supplementary material for: A phase IA dose-escalation study of PHI-101, a new checkpoint kinase 2 inhibitor, for platinum-resistant recurrent ovarian cancer
Source: Springer Nature journal article supplement (doi:10.1186/s12885-021-09138-z), 2022-01-03
Supplement: MOESM2 [file 19991398]

---

# Electronic Case Report Form

---

|             |                                                                                                                                                                                                                                                             |
|-------------|-------------------------------------------------------------------------------------------------------------------------------------------------------------------------------------------------------------------------------------------------------------|
| PROTOCOL    | PHI-101-002                                                                                                                                                                                                                                                 |
| STUDY TITLE | 백금 저항성/불응성 난소암 환자 대상 PHI-101의 안전성, 내약성 및 약동학적 특성을 평가하기 위한 공개, 용량결정, 제1상 임상시험<br>A Phase I, Open-label, Dose-finding Study to Assess the Safety, Tolerability and Pharmacokinetics of PHI-101 in Patients with Platinum-Resistance/Refractory Ovarian Cancer |

|                  |            |
|------------------|------------|
| Site Name        | -          |
| CRF Version      | 2.1        |
| CRF Effective    | 2021-07-06 |
| Screening Number | -          |

|                  |             |      |               |
|------------------|-------------|------|---------------|
|                  | PROTOCOL    | SITE | SCREENING NO. |
| SCHEDULE (1 / 2) | PHI-101-002 |      |               |

|                          | 등록                       | Screen                   | C1D1                     | C1D8                     | C1D1<br>5                | C1D2<br>2                | C2D1                     | C2D1<br>5                | C3D1                     | C3D1<br>5                |
|--------------------------|--------------------------|--------------------------|--------------------------|--------------------------|--------------------------|--------------------------|--------------------------|--------------------------|--------------------------|--------------------------|
| 등록                       | <input type="checkbox"/> |                          |                          |                          |                          |                          |                          |                          |                          |                          |
| 방문일                      |                          | <input type="checkbox"/> | <input type="checkbox"/> | <input type="checkbox"/> | <input type="checkbox"/> | <input type="checkbox"/> | <input type="checkbox"/> | <input type="checkbox"/> | <input type="checkbox"/> | <input type="checkbox"/> |
| 인구학적<br>정보               |                          | <input type="checkbox"/> |                          |                          |                          |                          |                          |                          |                          |                          |
| 암 관련 정<br>보              |                          | <input type="checkbox"/> |                          |                          |                          |                          |                          |                          |                          |                          |
| 병력                       |                          | <input type="checkbox"/> |                          |                          |                          |                          |                          |                          |                          |                          |
| 활력징후,<br>신체계측            |                          | <input type="checkbox"/> | <input type="checkbox"/> |                          | <input type="checkbox"/> |                          | <input type="checkbox"/> | <input type="checkbox"/> | <input type="checkbox"/> | <input type="checkbox"/> |
| 신체검진                     |                          | <input type="checkbox"/> | <input type="checkbox"/> |                          | <input type="checkbox"/> |                          | <input type="checkbox"/> | <input type="checkbox"/> | <input type="checkbox"/> | <input type="checkbox"/> |
| ECOG PS                  |                          | <input type="checkbox"/> | <input type="checkbox"/> |                          | <input type="checkbox"/> |                          | <input type="checkbox"/> | <input type="checkbox"/> | <input type="checkbox"/> | <input type="checkbox"/> |
| 임신검사                     |                          | <input type="checkbox"/> | <input type="checkbox"/> |                          |                          |                          | <input type="checkbox"/> |                          | <input type="checkbox"/> |                          |
| 실험실 검<br>사               |                          | <input type="checkbox"/> | <input type="checkbox"/> | <input type="checkbox"/> | <input type="checkbox"/> | <input type="checkbox"/> | <input type="checkbox"/> | <input type="checkbox"/> | <input type="checkbox"/> | <input type="checkbox"/> |
| 12-Lead<br>ECG           |                          | <input type="checkbox"/> | <input type="checkbox"/> |                          |                          |                          | <input type="checkbox"/> | <input type="checkbox"/> | <input type="checkbox"/> | <input type="checkbox"/> |
| ECHO 또<br>는 MUGA<br>scan |                          | <input type="checkbox"/> | <input type="checkbox"/> | <input type="checkbox"/> | <input type="checkbox"/> | <input type="checkbox"/> | <input type="checkbox"/> | <input type="checkbox"/> | <input type="checkbox"/> | <input type="checkbox"/> |
| 선정/제외<br>기준              |                          | <input type="checkbox"/> | <input type="checkbox"/> |                          |                          |                          |                          |                          |                          |                          |
| PK 채혈                    |                          |                          | <input type="checkbox"/> | <input type="checkbox"/> | <input type="checkbox"/> | <input type="checkbox"/> | <input type="checkbox"/> |                          | <input type="checkbox"/> |                          |
| PHI-101<br>투여            |                          |                          |                          |                          |                          |                          |                          |                          |                          |                          |
| 임상시험<br>투여종료             |                          |                          |                          |                          |                          |                          |                          |                          |                          |                          |
| DLT 관찰                   |                          |                          |                          |                          |                          |                          |                          |                          |                          |                          |
| CA 125<br>검사             |                          |                          |                          |                          |                          |                          |                          |                          |                          |                          |
| 종양평가                     |                          |                          |                          |                          |                          |                          |                          |                          |                          |                          |
| 이상반응                     |                          |                          |                          |                          |                          |                          |                          |                          |                          |                          |

|                  |             |      |               |
|------------------|-------------|------|---------------|
|                  | PROTOCOL    | SITE | SCREENING NO. |
| SCHEDULE (1 / 2) | PHI-101-002 |      |               |

|                      | 등록 | Screen | C1D1 | C1D8 | C1D1<br>5 | C1D2<br>2 | C2D1 | C2D1<br>5 | C3D1 | C3D1<br>5 |
|----------------------|----|--------|------|------|-----------|-----------|------|-----------|------|-----------|
| 선행/병용<br>약물          |    |        |      |      |           |           |      |           |      |           |
| 선행/병용<br>요법          |    |        |      |      |           |           |      |           |      |           |
| 새로운 항<br>암 요법 확<br>인 |    |        |      |      |           |           |      |           |      |           |
| 생존여부<br>확인           |    |        |      |      |           |           |      |           |      |           |
| 임상시험<br>종료           |    |        |      |      |           |           |      |           |      |           |
| 시험책임<br>자 서명         |    |        |      |      |           |           |      |           |      |           |

|                  |             |      |               |
|------------------|-------------|------|---------------|
|                  | PROTOCOL    | SITE | SCREENING NO. |
| SCHEDULE (2 / 2) | PHI-101-002 |      |               |

|                          | C4D1                     | EOT                      | USV1                     | FU1-1                    | EOS                      | All1                     | FU2-1                    | All2                     |
|--------------------------|--------------------------|--------------------------|--------------------------|--------------------------|--------------------------|--------------------------|--------------------------|--------------------------|
| 등록                       |                          |                          |                          |                          |                          |                          |                          |                          |
| 방문일                      | <input type="checkbox"/> | <input type="checkbox"/> | <input type="checkbox"/> | <input type="checkbox"/> | <input type="checkbox"/> |                          | <input type="checkbox"/> |                          |
| 인구학적<br>정보               |                          |                          |                          |                          |                          |                          |                          |                          |
| 암 관련 정<br>보              |                          |                          |                          |                          |                          |                          |                          |                          |
| 병력                       |                          |                          |                          |                          |                          |                          |                          |                          |
| 활력징후,<br>신체계측            | <input type="checkbox"/> | <input type="checkbox"/> | <input type="checkbox"/> |                          |                          |                          |                          |                          |
| 신체검진                     | <input type="checkbox"/> | <input type="checkbox"/> | <input type="checkbox"/> |                          |                          |                          |                          |                          |
| ECOG PS                  | <input type="checkbox"/> | <input type="checkbox"/> | <input type="checkbox"/> |                          |                          |                          |                          |                          |
| 임신검사                     | <input type="checkbox"/> | <input type="checkbox"/> | <input type="checkbox"/> |                          |                          |                          |                          |                          |
| 실험실 검<br>사               | <input type="checkbox"/> | <input type="checkbox"/> | <input type="checkbox"/> |                          |                          |                          |                          |                          |
| 12-Lead<br>ECG           | <input type="checkbox"/> | <input type="checkbox"/> | <input type="checkbox"/> |                          |                          |                          |                          |                          |
| ECHO 또<br>는 MUGA<br>scan | <input type="checkbox"/> | <input type="checkbox"/> | <input type="checkbox"/> |                          |                          |                          |                          |                          |
| 선정/제외<br>기준              |                          |                          |                          |                          |                          |                          |                          |                          |
| PK 채혈                    | <input type="checkbox"/> | <input type="checkbox"/> |                          |                          |                          |                          |                          |                          |
| PHI-101<br>투여            |                          |                          |                          |                          |                          | <input type="checkbox"/> |                          |                          |
| 임상시험<br>투여종료             |                          | <input type="checkbox"/> |                          |                          |                          |                          |                          |                          |
| DLT 관찰                   |                          |                          |                          |                          |                          | <input type="checkbox"/> |                          |                          |
| CA 125<br>검사             |                          |                          |                          |                          |                          |                          |                          | <input type="checkbox"/> |
| 종양평가                     |                          |                          |                          |                          |                          |                          |                          | <input type="checkbox"/> |
| 이상반응                     |                          |                          |                          |                          |                          |                          |                          | <input type="checkbox"/> |
| 선행/병용<br>약물              |                          |                          |                          |                          |                          |                          |                          | <input type="checkbox"/> |

|                  |             |      |               |
|------------------|-------------|------|---------------|
|                  | PROTOCOL    | SITE | SCREENING NO. |
| SCHEDULE (2 / 2) | PHI-101-002 |      |               |

|                      | C4D1 | EOT | USV1 | FU1-1 | EOS | All1                     | FU2-1 | All2                     |
|----------------------|------|-----|------|-------|-----|--------------------------|-------|--------------------------|
| 선행/병용<br>요법          |      |     |      |       |     |                          |       | <input type="checkbox"/> |
| 새로운 항<br>암 요법 확<br>인 |      |     |      |       |     |                          |       | <input type="checkbox"/> |
| 생존여부<br>확인           |      |     |      |       |     |                          |       | <input type="checkbox"/> |
| 임상시험<br>종료           |      |     |      |       |     | <input type="checkbox"/> |       | <input type="checkbox"/> |
| 시험책임<br>자 서명         |      |     |      |       |     | <input type="checkbox"/> |       | <input type="checkbox"/> |

|      |             |      |               |
|------|-------------|------|---------------|
| 등록   | PROTOCOL    | SITE | SCREENING NO. |
| 등록   | PHI-101-002 |      |               |
| 전자서명 |             |      |               |

| 등록                     |                                                                                                                                                                |
|------------------------|----------------------------------------------------------------------------------------------------------------------------------------------------------------|
| 시험대상자 동의서 서명일을 기재하십시오. |                                                                                                                                                                |
| 동의서 서명일                | _____                                                                                                                                                          |
| 재스크리닝 대상자입니까?          | <input type="radio"/> 예<br><input type="radio"/> 아니오                                                                                                           |
| 이전 스크리닝 번호             | _____                                                                                                                                                          |
| 용량수준(Cohort)           | <input type="radio"/> 1<br><input type="radio"/> 2<br><input type="radio"/> 3<br><input type="radio"/> 4<br><input type="radio"/> 5<br><input type="radio"/> 6 |
| DLT 평가불능 대상자를 대체합니까?   | <input type="radio"/> 예<br><input type="radio"/> 아니오                                                                                                           |
| 스크리닝 번호                | _____                                                                                                                                                          |

| Screen | PROTOCOL    | SITE | SCREENING NO. |
|--------|-------------|------|---------------|
| 방문일    | PHI-101-002 |      |               |
| 전자서명   |             |      |               |

| 방문일 |       |
|-----|-------|
| 방문일 | _____ |

| 선행/병용약물 확인                                                          |
|---------------------------------------------------------------------|
| Screen방문 기준 24주 이내 투여되었거나 현재 투여중인 약물이 있는 경우 선행/병용약물 페이지에 기록하여 주십시오. |

| 이상반응 확인                                          |
|--------------------------------------------------|
| 동의서 취득 이후부터 발생한 이상반응이 있을 경우 이상반응 페이지에 기록하여 주십시오. |

| Screen  | PROTOCOL    | SITE | SCREENING NO. |
|---------|-------------|------|---------------|
| 인구학적 정보 | PHI-101-002 |      |               |
| 전자서명    |             |      |               |

| 인구학적 정보                                                                                                                                                                                                                    |                                                      |
|----------------------------------------------------------------------------------------------------------------------------------------------------------------------------------------------------------------------------|------------------------------------------------------|
| 생년월                                                                                                                                                                                                                        | —                                                    |
| 연령[자동계산]                                                                                                                                                                                                                   | 만 _ 세                                                |
| 성별                                                                                                                                                                                                                         | <input type="radio"/> 남성<br><input type="radio"/> 여성 |
| 가임 여부                                                                                                                                                                                                                      | <input type="radio"/> 예<br><input type="radio"/> 아니오 |
| <p>비가임 여성은 아래의 조건 중 1개 이상 충족하는 경우로 정의한다.</p> <ul style="list-style-type: none"> <li>- 12개월 동안 자연적인 무월경</li> <li>- 혈중 FSH 농도가 40 mIU/mL를 초과하면서 6개월 동안의 자연적인 무월경</li> <li>- 외과적 불임수술 자궁적출술, 난소절제술, 난관결찰술 등을 받은 경우</li> </ul> |                                                      |



| Screen  | PROTOCOL    | SITE | SCREENING NO. |
|---------|-------------|------|---------------|
| 암 관련 정보 | PHI-101-002 |      |               |
| 전자서명    |             |      |               |

### 난소암 기초정보

|                 |                                                                                                  |
|-----------------|--------------------------------------------------------------------------------------------------|
| 암 진단 여부         | <input type="radio"/> 예<br><input type="radio"/> 아니오                                             |
| 난소암 종류(원발장기/부위) | <input type="checkbox"/> 난소암<br><input type="checkbox"/> 난관암<br><input type="checkbox"/> 원발성 복막암 |
| 난소암 최초 진단일      | _____                                                                                            |
| 유병기간[자동계산]      | __ 일                                                                                             |
| 등록시점의 병기        | ____▼                                                                                            |

|                |                                                   |
|----------------|---------------------------------------------------|
| 등록시점의 병기       | Stage I , Stage II , Stage III , Stage IV , Other |
| 등록시점의 병기_Other | _____<br>_____<br>_____                           |

|              |                                                                                                                                                                                     |
|--------------|-------------------------------------------------------------------------------------------------------------------------------------------------------------------------------------|
| 전이 여부        | <input type="radio"/> 예<br><input type="radio"/> 아니오                                                                                                                                |
| 전이 부위        | <input type="checkbox"/> 뼈<br><input type="checkbox"/> 뇌<br><input type="checkbox"/> 간<br><input type="checkbox"/> 폐<br><input type="checkbox"/> 림프절<br><input type="checkbox"/> 기타 |
| 전이 부위, 기타 상세 | _____<br>_____<br>_____                                                                                                                                                             |

|         |             |      |               |
|---------|-------------|------|---------------|
| Screen  | PROTOCOL    | SITE | SCREENING NO. |
| 암 관련 정보 | PHI-101-002 |      |               |
| 전자서명    |             |      |               |

|                                                                              |                                                        |
|------------------------------------------------------------------------------|--------------------------------------------------------|
| 백금기반 치료 유형                                                                   | <input type="radio"/> 불응성<br><input type="radio"/> 저항성 |
| * 불응성: 백금기반 항암요법 진행중, 질병이 진행함<br>* 저항성: 백금기반 항암요법 완료 수, 6개월(24주) 이내에 질병이 진행함 |                                                        |
| <b>조직학적/세포학적 유형</b>                                                          |                                                        |
| 상피성암                                                                         | <input type="radio"/> 예<br><input type="radio"/> 아니오   |
| 흔하지 않는 난소 조직병리(LCOH)                                                         | <input type="radio"/> 예<br><input type="radio"/> 아니오   |

| <b>항암화학요법</b>                                                                                                                                                 |       |       |         |                               |       |        |        |            |
|---------------------------------------------------------------------------------------------------------------------------------------------------------------|-------|-------|---------|-------------------------------|-------|--------|--------|------------|
| None                                                                                                                                                          |       |       |         | <input type="checkbox"/> None |       |        |        |            |
| * 항암 화학요법 (regimen)의 구체적인 내용을 아래에 기록하십시오. 약물명은 regimen 단위로 기재합니다.<br>* 해당 요법의 각각의 약물명과 투여 경로를 기록하고, 총 투여 주기수, 시작일, 종료일, 목적, 변경사유는 항암요법 (regimen)을 기준으로 작성합니다. |       |       |         |                               |       |        |        |            |
| No                                                                                                                                                            | 약물명   | 경로    | 총 투여 주기 | 시작일                           | 종료일   | 목적     | 변경사유   | 최상의 전반적 반응 |
| 1                                                                                                                                                             | _____ | _____ | _____   | _____                         | _____ | _____▼ | _____▼ | _____▼     |

|            |                                                                    |
|------------|--------------------------------------------------------------------|
| 목적         | Neoadjuvant , Adjuvant , Palliative , Unknown                      |
| 변경사유       | Resistance , Refractory , Intolerability , Cumulative dose , Other |
| 변경사유_Other | _____                                                              |
| 변경사유_Other | _____                                                              |
| 변경사유_Other | _____                                                              |
| 최상의 전반적 반응 | CR , PR , SD , PD , NE                                             |

|             |
|-------------|
| <b>수술요법</b> |
|-------------|

|         |             |      |               |
|---------|-------------|------|---------------|
| Screen  | PROTOCOL    | SITE | SCREENING NO. |
| 암 관련 정보 | PHI-101-002 |      |               |
| 전자서명    |             |      |               |

| None |       | <input type="checkbox"/> None |       |                            |
|------|-------|-------------------------------|-------|----------------------------|
| No   | 수술명   | 수술일                           | 부위    | 목적                         |
| 1    | _____ | _____                         | _____ | ○ Curative<br>○ Palliative |

| 방사선요법 |          |                               |       |            |        |
|-------|----------|-------------------------------|-------|------------|--------|
| None  |          | <input type="checkbox"/> None |       |            |        |
| No    | 방사선 조사부위 | 시행일                           | 종료일   | 총 방사선량(Gy) | 목적     |
| 1     | _____▼   | _____                         | _____ | _____      | _____▼ |

|             |                                                                                                                     |
|-------------|---------------------------------------------------------------------------------------------------------------------|
| 방사선 조사부위    | 난소, 난관, 위, 대장, 직장, 신장, 전립선, 방광, 췌장, 간, 쓸개 및/또는 담도, 유방, 자궁경부, 갑상선, 폐(비소세포), 폐(소세포), 근육/뼈 및/또는 결합조직, 악성 복수, 악성 흉수, 기타 |
| 방사선 조사부위_기타 | _____                                                                                                               |
| 목적          | Neoadjuvant , Adjuvant , Palliative , Unknown                                                                       |

| 면역요법/호르몬요법 |       |                                               |       |       |        |        |            |
|------------|-------|-----------------------------------------------|-------|-------|--------|--------|------------|
| None       |       | <input type="checkbox"/> None                 |       |       |        |        |            |
| No         | 약물명   | 경로                                            | 투여일   | 종료일   | 목적     | 변경사유   | 최상의 전반적 반응 |
| 1          | _____ | _____                                         | _____ | _____ | _____▼ | _____▼ | _____▼     |
| 목적         |       | Neoadjuvant , Adjuvant , Palliative , Unknown |       |       |        |        |            |

|         |             |      |               |
|---------|-------------|------|---------------|
| Screen  | PROTOCOL    | SITE | SCREENING NO. |
| 암 관련 정보 | PHI-101-002 |      |               |
| 전자서명    |             |      |               |

|            |                                                       |
|------------|-------------------------------------------------------|
| 변경사유       | Refractory , Intolerability , Cumulative dose , Other |
| 변경사유_Other | _____<br>_____<br>_____                               |
| 최상의 전반적 반응 | CR , PR , SD , PD , NE                                |

| <b>HRD 관련 유전자</b>                                                                                                                      |                         |                               |                       |
|----------------------------------------------------------------------------------------------------------------------------------------|-------------------------|-------------------------------|-----------------------|
| None                                                                                                                                   |                         | <input type="checkbox"/> None |                       |
| BRCA1, BRCA2, FANC, ATM, MRE11A, RAD51, RAD54, ATR, DSS1, RPA1, NBS1, CHEK1, CHEK2 등 해당하는 항목을 기재 후 검사일 및 wild type/mutation 여부를 기재합니다. |                         |                               |                       |
| No                                                                                                                                     | 항목                      | 검사일                           | wild type/mutation 여부 |
| 1                                                                                                                                      | _____<br>_____<br>_____ | _____                         | ____▼                 |
| wild type/mutation 여부                                                                                                                  |                         | wild type , mutation , NA     |                       |

|        |             |      |               |
|--------|-------------|------|---------------|
| Screen | PROTOCOL    | SITE | SCREENING NO. |
| 병력     | PHI-101-002 |      |               |
| 전자서명   |             |      |               |

**병력**

None  None

- \* 대상자의 동의 취득 전까지 관찰된 임상적으로 유의한 의학적 상태 또는 비정상은 병력으로 간주합니다.
- \* Screen 방문 기준 지난 24주 이내의 병력(외과적 수술/시술력 포함)을 조사합니다.  
단, 선정/제외 기준과 관련된 병력의 경우, 계획서에 따라 검토되어야 하는 기간에 준하여 모두 조사하여야 한다.
- \* 외과적 수술(시술 포함)의 경우 '수술명'과 '수술을 하게 된 원인 질환명'을 각각 기재합니다.

| No | 의학적 상태/진단명              | 진단일/수술일 | 방문 당시 지속여부                       | 종료일   | Comment                 |
|----|-------------------------|---------|----------------------------------|-------|-------------------------|
| 1  | _____<br>_____<br>_____ | _____   | ○ 예<br>○ 아니오<br>○ 해당없음(시술 또는 수술) | _____ | _____<br>_____<br>_____ |

| Screen     | PROTOCOL    | SITE | SCREENING NO. |
|------------|-------------|------|---------------|
| 활력징후, 신체계측 | PHI-101-002 |      |               |
| 전자서명       |             |      |               |

| 활력징후                                                              |                                                      |
|-------------------------------------------------------------------|------------------------------------------------------|
| ND                                                                | <input type="checkbox"/> ND                          |
| 미실시인 경우 사유                                                        | _____<br>_____<br>_____                              |
| 5분 이상 안정을 취한 후 앉은 자세(좌위)에서 측정합니다.                                 |                                                      |
| 측정일                                                               | _____                                                |
| 수축기 혈압                                                            | _ mmHg                                               |
| 이완기 혈압                                                            | _ mmHg                                               |
| 맥박                                                                | _ 회/분                                                |
| 호흡수                                                               | _ 회/분                                                |
| 체온                                                                | _ °C                                                 |
| 임상적으로 유의한 비정상 소견이 있습니까?                                           | <input type="radio"/> 예<br><input type="radio"/> 아니오 |
| 대상자의 동의 취득 전까지 관찰된 임상적으로 유의한 비정상 소견이 있을 경우, 비정상 소견은 '병력'에 기록하십시오. |                                                      |

| 신체계측       |                             |
|------------|-----------------------------|
| ND         | <input type="checkbox"/> ND |
| 미실시인 경우 사유 | _____<br>_____<br>_____     |
| 측정일        | _____                       |
| 신장         | _ cm                        |

| Screen     | PROTOCOL    | SITE | SCREENING NO. |
|------------|-------------|------|---------------|
| 활력징후, 신체계측 | PHI-101-002 |      |               |
| 전자서명       |             |      |               |

|    |       |
|----|-------|
| 체중 | __ kg |
|----|-------|

|        |             |      |               |
|--------|-------------|------|---------------|
| Screen | PROTOCOL    | SITE | SCREENING NO. |
| 신체검진   | PHI-101-002 |      |               |
| 전자서명   |             |      |               |

**신체검진**

|                            |                                                                                             |
|----------------------------|---------------------------------------------------------------------------------------------|
| ND                         | <input type="checkbox"/> ND                                                                 |
| 미실시인 경우 사유                 | _____<br>_____<br>_____                                                                     |
| 검진일                        | _____                                                                                       |
| 각 신체기관 검진 결과 비정상 소견이 있습니까? | <input type="radio"/> 예 → <u>아래 표에 신체기관 및 상세내용을 기재하여 주십시오.</u><br><input type="radio"/> 아니오 |

대상자의 동의 취득 전까지 관찰된 임상적으로 유의한 비정상 소견이 있을 경우, 비정상 소견은 '병력'에 기록하십시오.

| No | 신체기관   | 임상적 유의성                                           |
|----|--------|---------------------------------------------------|
| 1  | _____▼ | <input type="radio"/> 예 <input type="radio"/> 아니오 |

|         |                                                            |
|---------|------------------------------------------------------------|
| 신체기관    | 외관, 피부, 두/경부, 흉부/폐, 심장, 복부, 비뇨/생식계, 사지, 근골격계, 신경계, 림프절, 기타 |
| 신체기관_기타 | _____<br>_____<br>_____                                    |



|         |             |      |               |
|---------|-------------|------|---------------|
| Screen  | PROTOCOL    | SITE | SCREENING NO. |
| ECOG PS | PHI-101-002 |      |               |
| 전자서명    |             |      |               |

| ECOG PS    |                                                                                                                                                                                                    |
|------------|----------------------------------------------------------------------------------------------------------------------------------------------------------------------------------------------------|
| ND         | <input type="checkbox"/> ND                                                                                                                                                                        |
| 미실시인 경우 사유 | <hr/> <hr/> <hr/>                                                                                                                                                                                  |
| 평가일        | _____                                                                                                                                                                                              |
| ECOG PS    | <input type="radio"/> Grade 0<br><input type="radio"/> Grade 1<br><input type="radio"/> Grade 2<br><input type="radio"/> Grade 3<br><input type="radio"/> Grade 4<br><input type="radio"/> Grade 5 |

| Screen | PROTOCOL    | SITE | SCREENING NO. |
|--------|-------------|------|---------------|
| 임신검사   | PHI-101-002 |      |               |
| 전자서명   |             |      |               |

| 임신검사                     |                                                                    |
|--------------------------|--------------------------------------------------------------------|
| ND                       | <input type="checkbox"/> ND                                        |
| 미실시인 경우 사유               | _____<br>_____<br>_____                                            |
| 검사일                      | _____                                                              |
| 검사 방법                    | <input type="radio"/> urine-hCG<br><input type="radio"/> serum-hCG |
| 검사결과                     | <input type="radio"/> 양성<br><input type="radio"/> 음성               |
| serum-hCG 검사 방법으로 실시합니다. |                                                                    |

|        |             |      |               |
|--------|-------------|------|---------------|
| Screen | PROTOCOL    | SITE | SCREENING NO. |
| 실험실 검사 | PHI-101-002 |      |               |
| 전자서명   |             |      |               |

| 실험실 검사                                                                                                                              |                                                      |
|-------------------------------------------------------------------------------------------------------------------------------------|------------------------------------------------------|
| ND                                                                                                                                  | <input type="checkbox"/> ND                          |
| 미실시인 경우 사유                                                                                                                          | _____<br>_____<br>_____                              |
| 최소 8시간 금식 여부                                                                                                                        | <input type="radio"/> 예<br><input type="radio"/> 아니오 |
| 검체 채취일                                                                                                                              | _____                                                |
| <p>* 동의서 취득 전 검사 결과가 'Clinical Significance' 일 경우 비정상 소견은 '병력'에 기록하십시오.<br/>* 검사 항목별 단위는 "정상 참고 범위"와 함께 제공되므로 아래 결과에 기록하지 않습니다.</p> |                                                      |

| Hematology  |                             |                                                    |                                                   |
|-------------|-----------------------------|----------------------------------------------------|---------------------------------------------------|
| ND          | <input type="checkbox"/> ND |                                                    |                                                   |
| 검사항목        | 결과                          | 정상 여부                                              | 임상적 유의성                                           |
| WBC         | _____                       | <input type="radio"/> 정상 <input type="radio"/> 비정상 | <input type="radio"/> 예 <input type="radio"/> 아니오 |
| RBC         | _____                       | <input type="radio"/> 정상 <input type="radio"/> 비정상 | <input type="radio"/> 예 <input type="radio"/> 아니오 |
| Hemoglobin  | _____                       | <input type="radio"/> 정상 <input type="radio"/> 비정상 | <input type="radio"/> 예 <input type="radio"/> 아니오 |
| Hematocrit  | _____                       | <input type="radio"/> 정상 <input type="radio"/> 비정상 | <input type="radio"/> 예 <input type="radio"/> 아니오 |
| Platelet    | _____                       | <input type="radio"/> 정상 <input type="radio"/> 비정상 | <input type="radio"/> 예 <input type="radio"/> 아니오 |
| MCV         | _____                       | <input type="radio"/> 정상 <input type="radio"/> 비정상 | <input type="radio"/> 예 <input type="radio"/> 아니오 |
| MCH         | _____                       | <input type="radio"/> 정상 <input type="radio"/> 비정상 | <input type="radio"/> 예 <input type="radio"/> 아니오 |
| MCHC        | _____                       | <input type="radio"/> 정상 <input type="radio"/> 비정상 | <input type="radio"/> 예 <input type="radio"/> 아니오 |
| Neutrophils | _____                       | <input type="radio"/> 정상 <input type="radio"/> 비정상 | <input type="radio"/> 예 <input type="radio"/> 아니오 |

|        |             |      |               |
|--------|-------------|------|---------------|
| Screen | PROTOCOL    | SITE | SCREENING NO. |
| 실험실 검사 | PHI-101-002 |      |               |
| 전자서명   |             |      |               |

| 검사항목        | 결과    | 정상 여부                                              | 임상적 유의성                                           |
|-------------|-------|----------------------------------------------------|---------------------------------------------------|
| Lymphocytes | _____ | <input type="radio"/> 정상 <input type="radio"/> 비정상 | <input type="radio"/> 예 <input type="radio"/> 아니오 |
| Monocytes   | _____ | <input type="radio"/> 정상 <input type="radio"/> 비정상 | <input type="radio"/> 예 <input type="radio"/> 아니오 |
| Eosinophils | _____ | <input type="radio"/> 정상 <input type="radio"/> 비정상 | <input type="radio"/> 예 <input type="radio"/> 아니오 |
| Basophils   | _____ | <input type="radio"/> 정상 <input type="radio"/> 비정상 | <input type="radio"/> 예 <input type="radio"/> 아니오 |
| ANC         | _____ | <input type="radio"/> 정상 <input type="radio"/> 비정상 | <input type="radio"/> 예 <input type="radio"/> 아니오 |

| Chemistry       |                             |                                                    |                                                   |
|-----------------|-----------------------------|----------------------------------------------------|---------------------------------------------------|
| ND              | <input type="checkbox"/> ND |                                                    |                                                   |
| 검사항목            | 결과                          | 정상 여부                                              | 임상적 유의성                                           |
| BUN             | _____                       | <input type="radio"/> 정상 <input type="radio"/> 비정상 | <input type="radio"/> 예 <input type="radio"/> 아니오 |
| Creatinine      | _____                       | <input type="radio"/> 정상 <input type="radio"/> 비정상 | <input type="radio"/> 예 <input type="radio"/> 아니오 |
| Total bilirubin | _____                       | <input type="radio"/> 정상 <input type="radio"/> 비정상 | <input type="radio"/> 예 <input type="radio"/> 아니오 |
| AST             | _____                       | <input type="radio"/> 정상 <input type="radio"/> 비정상 | <input type="radio"/> 예 <input type="radio"/> 아니오 |
| ALT             | _____                       | <input type="radio"/> 정상 <input type="radio"/> 비정상 | <input type="radio"/> 예 <input type="radio"/> 아니오 |
| ALP             | _____                       | <input type="radio"/> 정상 <input type="radio"/> 비정상 | <input type="radio"/> 예 <input type="radio"/> 아니오 |
| γGT             | _____                       | <input type="radio"/> 정상 <input type="radio"/> 비정상 | <input type="radio"/> 예 <input type="radio"/> 아니오 |
| LDH             | _____                       | <input type="radio"/> 정상 <input type="radio"/> 비정상 | <input type="radio"/> 예 <input type="radio"/> 아니오 |
| Total protein   | _____                       | <input type="radio"/> 정상 <input type="radio"/> 비정상 | <input type="radio"/> 예 <input type="radio"/> 아니오 |
| Albumin         | _____                       | <input type="radio"/> 정상 <input type="radio"/> 비정상 | <input type="radio"/> 예 <input type="radio"/> 아니오 |
| Globulin[자동계산]  | _____                       | <input type="radio"/> 정상 <input type="radio"/> 비정상 | <input type="radio"/> 예 <input type="radio"/> 아니오 |

|        |             |      |               |
|--------|-------------|------|---------------|
| Screen | PROTOCOL    | SITE | SCREENING NO. |
| 실험실 검사 | PHI-101-002 |      |               |
| 전자서명   |             |      |               |

| 검사항목              | 결과    | 정상 여부                                              | 임상적 유의성                                           |
|-------------------|-------|----------------------------------------------------|---------------------------------------------------|
| Ca                | _____ | <input type="radio"/> 정상 <input type="radio"/> 비정상 | <input type="radio"/> 예 <input type="radio"/> 아니오 |
| Mg                | _____ | <input type="radio"/> 정상 <input type="radio"/> 비정상 | <input type="radio"/> 예 <input type="radio"/> 아니오 |
| Na                | _____ | <input type="radio"/> 정상 <input type="radio"/> 비정상 | <input type="radio"/> 예 <input type="radio"/> 아니오 |
| K                 | _____ | <input type="radio"/> 정상 <input type="radio"/> 비정상 | <input type="radio"/> 예 <input type="radio"/> 아니오 |
| Cl                | _____ | <input type="radio"/> 정상 <input type="radio"/> 비정상 | <input type="radio"/> 예 <input type="radio"/> 아니오 |
| P                 | _____ | <input type="radio"/> 정상 <input type="radio"/> 비정상 | <input type="radio"/> 예 <input type="radio"/> 아니오 |
| Total cholesterol | _____ | <input type="radio"/> 정상 <input type="radio"/> 비정상 | <input type="radio"/> 예 <input type="radio"/> 아니오 |
| Triglyceride      | _____ | <input type="radio"/> 정상 <input type="radio"/> 비정상 | <input type="radio"/> 예 <input type="radio"/> 아니오 |
| CPK               | _____ | <input type="radio"/> 정상 <input type="radio"/> 비정상 | <input type="radio"/> 예 <input type="radio"/> 아니오 |
| Glucose           | _____ | <input type="radio"/> 정상 <input type="radio"/> 비정상 | <input type="radio"/> 예 <input type="radio"/> 아니오 |
| CrCl[자동계산]        | _____ |                                                    |                                                   |

| Urinalysis       |                             |                                                    |                                                   |
|------------------|-----------------------------|----------------------------------------------------|---------------------------------------------------|
| ND               | <input type="checkbox"/> ND |                                                    |                                                   |
| 검사항목             | 결과                          | 정상 여부                                              | 임상적 유의성                                           |
| Specific gravity | _____                       | <input type="radio"/> 정상 <input type="radio"/> 비정상 | <input type="radio"/> 예 <input type="radio"/> 아니오 |
| pH               | _____                       | <input type="radio"/> 정상 <input type="radio"/> 비정상 | <input type="radio"/> 예 <input type="radio"/> 아니오 |
| Bilirubin[U]     | _____                       | <input type="radio"/> 정상 <input type="radio"/> 비정상 | <input type="radio"/> 예 <input type="radio"/> 아니오 |
| Urobilinogen[U]  | _____                       | <input type="radio"/> 정상 <input type="radio"/> 비정상 | <input type="radio"/> 예 <input type="radio"/> 아니오 |
| Blood[U]         | _____                       | <input type="radio"/> 정상 <input type="radio"/> 비정상 | <input type="radio"/> 예 <input type="radio"/> 아니오 |

|        |             |      |               |
|--------|-------------|------|---------------|
| Screen | PROTOCOL    | SITE | SCREENING NO. |
| 실험실 검사 | PHI-101-002 |      |               |
| 전자서명   |             |      |               |

| 검사항목                | 결과    | 정상 여부                                              | 임상적 유의성                                           |
|---------------------|-------|----------------------------------------------------|---------------------------------------------------|
| Glucose[U]          | _____ | <input type="radio"/> 정상 <input type="radio"/> 비정상 | <input type="radio"/> 예 <input type="radio"/> 아니오 |
| Protein[U] (Alb[U]) | _____ | <input type="radio"/> 정상 <input type="radio"/> 비정상 | <input type="radio"/> 예 <input type="radio"/> 아니오 |
| Ketones[U]          | _____ | <input type="radio"/> 정상 <input type="radio"/> 비정상 | <input type="radio"/> 예 <input type="radio"/> 아니오 |
| Leukocytes[U]       | _____ | <input type="radio"/> 정상 <input type="radio"/> 비정상 | <input type="radio"/> 예 <input type="radio"/> 아니오 |

| Thyroid Function Tests |                             |                                                    |                                                   |
|------------------------|-----------------------------|----------------------------------------------------|---------------------------------------------------|
| ND                     | <input type="checkbox"/> ND |                                                    |                                                   |
| 검사항목                   | 결과                          | 정상 여부                                              | 임상적 유의성                                           |
| TSH                    | _____                       | <input type="radio"/> 정상 <input type="radio"/> 비정상 | <input type="radio"/> 예 <input type="radio"/> 아니오 |
| Free T4                | _____                       | <input type="radio"/> 정상 <input type="radio"/> 비정상 | <input type="radio"/> 예 <input type="radio"/> 아니오 |

| Tests for HbA1c |                             |                                                    |                                                   |
|-----------------|-----------------------------|----------------------------------------------------|---------------------------------------------------|
| ND              | <input type="checkbox"/> ND |                                                    |                                                   |
| 검사항목            | 결과                          | 정상 여부                                              | 임상적 유의성                                           |
| HbA1c           | _____                       | <input type="radio"/> 정상 <input type="radio"/> 비정상 | <input type="radio"/> 예 <input type="radio"/> 아니오 |

| Coagulation Profile |                             |                                                    |                                                   |
|---------------------|-----------------------------|----------------------------------------------------|---------------------------------------------------|
| ND                  | <input type="checkbox"/> ND |                                                    |                                                   |
| 검사항목                | 결과                          | 정상 여부                                              | 임상적 유의성                                           |
| PT INR              | _____                       | <input type="radio"/> 정상 <input type="radio"/> 비정상 | <input type="radio"/> 예 <input type="radio"/> 아니오 |
| aPTT                | _____                       | <input type="radio"/> 정상 <input type="radio"/> 비정상 | <input type="radio"/> 예 <input type="radio"/> 아니오 |
| Fibrinogen          | _____                       | <input type="radio"/> 정상 <input type="radio"/> 비정상 | <input type="radio"/> 예 <input type="radio"/> 아니오 |

|        |             |      |               |
|--------|-------------|------|---------------|
| Screen | PROTOCOL    | SITE | SCREENING NO. |
| 실험실 검사 | PHI-101-002 |      |               |
| 전자서명   |             |      |               |

| 검사항목    | 결과    | 정상 여부                                              | 임상적 유의성                                           |
|---------|-------|----------------------------------------------------|---------------------------------------------------|
| D-dimer | _____ | <input type="radio"/> 정상 <input type="radio"/> 비정상 | <input type="radio"/> 예 <input type="radio"/> 아니오 |

| Viral Serology |                                                                                        |
|----------------|----------------------------------------------------------------------------------------|
| ND             | <input type="checkbox"/> ND                                                            |
| 검사항목           | 결과                                                                                     |
| HBsAg          | <input type="radio"/> ND <input type="radio"/> Positive <input type="radio"/> Negative |
| HBV DNA        | <input type="radio"/> ND <input type="radio"/> Positive <input type="radio"/> Negative |
| anti-HCV       | <input type="radio"/> ND <input type="radio"/> Positive <input type="radio"/> Negative |
| HCV RNA        | <input type="radio"/> ND <input type="radio"/> Positive <input type="radio"/> Negative |

| FSH  |                             |                                                    |                                                   |
|------|-----------------------------|----------------------------------------------------|---------------------------------------------------|
| ND   | <input type="checkbox"/> ND |                                                    |                                                   |
| 검사항목 | 결과                          | 정상 여부                                              | 임상적 유의성                                           |
| FSH  | _____                       | <input type="radio"/> 정상 <input type="radio"/> 비정상 | <input type="radio"/> 예 <input type="radio"/> 아니오 |

|             |             |      |               |
|-------------|-------------|------|---------------|
| Screen      | PROTOCOL    | SITE | SCREENING NO. |
| 12-Lead ECG | PHI-101-002 |      |               |
| 전자서명        |             |      |               |

| 12-Lead ECG                                                                                                                                                                                                                                     |            |                                                      |              |             |              |              |
|-------------------------------------------------------------------------------------------------------------------------------------------------------------------------------------------------------------------------------------------------|------------|------------------------------------------------------|--------------|-------------|--------------|--------------|
| ND                                                                                                                                                                                                                                              |            | <input type="checkbox"/> ND                          |              |             |              |              |
| 미실시인 경우 사유                                                                                                                                                                                                                                      |            | <hr/> <hr/> <hr/>                                    |              |             |              |              |
| 검사일                                                                                                                                                                                                                                             |            | _____                                                |              |             |              |              |
| 측정횟수                                                                                                                                                                                                                                            |            | <input type="radio"/> 1회<br><input type="radio"/> 3회 |              |             |              |              |
| BBB 여부                                                                                                                                                                                                                                          |            | <input type="radio"/> 예<br><input type="radio"/> 아니오 |              |             |              |              |
| No.                                                                                                                                                                                                                                             | Heart Rate | PR Interval                                          | QRS Duration | QT Interval | QTcB [자동 계산] | QTcF [자동 계산] |
| 1차                                                                                                                                                                                                                                              | __ bpm     | __ msec                                              | __ msec      | __ msec     | __           | __           |
| 2차                                                                                                                                                                                                                                              | __ bpm     | __ msec                                              | __ msec      | __ msec     | __           | __           |
| 3차                                                                                                                                                                                                                                              | __ bpm     | __ msec                                              | __ msec      | __ msec     | __           | __           |
| QTcB 평균[자동계산]                                                                                                                                                                                                                                   |            | __                                                   |              |             |              |              |
| QTcF 평균[자동계산]                                                                                                                                                                                                                                   |            | __                                                   |              |             |              |              |
| 임상적으로 유의한 비정상 소견이 있습니까?                                                                                                                                                                                                                         |            | <input type="radio"/> 예<br><input type="radio"/> 아니오 |              |             |              |              |
| <p>* 대상자의 동의 취득 전까지 관찰된 임상적으로 유의한 비정상 소견이 있을 경우, 비정상 소견은 '병력'에 기록하십시오.</p> <p>* Screen, C1D1 시점에서는 3회 측정하고, 이후 주기에서는 1회만 수행합니다.<br/>           (단, ECG를 통해 QT 간격 연장이 입증된 경우, 단기간(즉시)에 추가로 2개의 ECG를 수행하여 최종 3개 ECG의 평균 QTc interval을 확인합니다.)</p> |            |                                                      |              |             |              |              |



| Screen            | PROTOCOL    | SITE | SCREENING NO. |
|-------------------|-------------|------|---------------|
| ECHO 또는 MUGA scan | PHI-101-002 |      |               |
| 전자서명              |             |      |               |

| ECHO 또는 MUGA scan                                                                                                                      |                                                               |
|----------------------------------------------------------------------------------------------------------------------------------------|---------------------------------------------------------------|
| ND                                                                                                                                     | <input type="checkbox"/> ND                                   |
| 미실시인 경우 사유                                                                                                                             | _____<br>_____<br>_____                                       |
| 검사일                                                                                                                                    | _____                                                         |
| 검사 방법                                                                                                                                  | <input type="radio"/> ECHO<br><input type="radio"/> MUGA scan |
| 좌심실구출률(LVEF)                                                                                                                           | ___ %                                                         |
| 임상적으로 유의한 비정상 소견이 있습니까 ?                                                                                                               | <input type="radio"/> 예<br><input type="radio"/> 아니오          |
| <p>* 스크리닝 전 12주 이내에 실시된 검사결과가 있는 경우, 해당 검사결과로 대체할 수 있습니다.<br/> * 대상자의 동의 취득 전까지 관찰된 임상적으로 유의한 비정상 소견이 있을 경우, 비정상 소견은 '병력'에 기록하십시오.</p> |                                                               |

| Screen  | PROTOCOL    | SITE | SCREENING NO. |
|---------|-------------|------|---------------|
| 선정/제외기준 | PHI-101-002 |      |               |
| 전자서명    |             |      |               |

| 시험대상자 적합성                                 |                                                                                                                                                                   |
|-------------------------------------------|-------------------------------------------------------------------------------------------------------------------------------------------------------------------|
| 상기 시험대상자는 선정/제외 기준을 만족하고, 임상시험 참여에 적합합니까? | <input type="radio"/> 예<br><input type="radio"/> 아니오                                                                                                              |
| 탈락사유                                      | <input type="radio"/> 선정/제외기준 부적합 → <a href="#">Specify below</a><br><input type="radio"/> 시험대상자 동의철회<br><input type="radio"/> 기타 → <a href="#">Specify below</a> |
| 탈락사유 상세                                   | <hr/> <hr/> <hr/>                                                                                                                                                 |

| 선정기준                                                                                                                                                                                                                                                                                                                                                                                                                                                                                                                                                                                                                                                    |
|---------------------------------------------------------------------------------------------------------------------------------------------------------------------------------------------------------------------------------------------------------------------------------------------------------------------------------------------------------------------------------------------------------------------------------------------------------------------------------------------------------------------------------------------------------------------------------------------------------------------------------------------------------|
| 대상자는 다음의 모든 기준에 적격하여야 본 임상에 참여할 수 있다.                                                                                                                                                                                                                                                                                                                                                                                                                                                                                                                                                                                                                   |
| 1. 서면동의일 기준으로 만 19세 이상의 여성                                                                                                                                                                                                                                                                                                                                                                                                                                                                                                                                                                                                                              |
| 2. 임신(임신가능성, 임신계획), 수유 여부<br>① 비가임 여성, 임신 또는 수유 중이 아닌 여성, 임상시험 기간 동안 임신계획이 없는 여성<br>② 가임 여성인 경우, 스크리닝 기간 및 PHI-101 투여 직전의 임신반응검사서 음성으로 확인되고, 본 계획서에서 요구하는 효과적인 피임법을 PHI-101의 마지막 투여 후 6개월(24주)간 준수하기로 동의한 경우                                                                                                                                                                                                                                                                                                                                                                                                                                            |
| 3. 대상질환<br>① 조직학적(histologically) 또는 세포학적(cytologically)으로 확인된 난소암, 난관암 또는 원발성 복막암<br>② 국소조직학적 소견(local histopathological findings)으로 진단된 상피성암(epithelial malignant tumors) [WHO Histological Classification, 2014]<br>: 단, 흔하지 않는 난소 조직병리(LCOH)로 분류되는, 저등급장액성난소암(LGSC), 점액성난소암(mucinous carcinoma of the ovary), 암육종(악성혼합뿔러종양[MMMT]), 경계성상피성난소종양(저악성암종[LAP]) 제외 [NCCN Guideline version 2.2019]<br>③ 백금불응성암* 또는 백금저항성암**<br>*백금기반 항암요법 진행중, 질병이 진행함, **백금기반 항암요법 완료 후, 6개월(24주) 이내에 질병이 진행함<br>④ 현재 임상적 이익이 있는 것으로 알려진 표준치료법에 대해 불응하거나, 받을 수 없거나, 거부한 자로 수술이 불가능한 경우<br>⑤ [RECIST version 1.1]에 부합하는, 최소 한 개 이상의 측정 가능한 병변 또는 측정 불가하나 평가 가능한 병변을 가진 경우 |
| 4. 예상 생존기간 ≥ 12주                                                                                                                                                                                                                                                                                                                                                                                                                                                                                                                                                                                                                                        |
| 5. [ECOG PS] ≤ 1                                                                                                                                                                                                                                                                                                                                                                                                                                                                                                                                                                                                                                        |

| Screen  | PROTOCOL    | SITE | SCREENING NO. |
|---------|-------------|------|---------------|
| 선정/제외기준 | PHI-101-002 |      |               |
| 전자서명    |             |      |               |

6. 다음의 실험실적 검사를 통해 적절한 간, 신장, 혈액학적 기능이 확인된 자(스크리닝 기간 동안 재검 가능하다)

- ① ANC  $\geq 1,500/\text{mm}^3$  (단, 베이스라인 이전 2주 이내에 G-CSF 투여 없이)
- ② Hb  $\geq 10.0 \text{ g/dL}$  (단, 베이스라인 이전 2주 이내에 수혈 없이)
- ③ Platelet count  $\geq 75,000/\text{mm}^3$  (단, 베이스라인 이전 2주 이내에 수혈 없이)
- ④ Total bilirubin  $\leq 1.5 \times \text{ULN}$
- ⑤ AST and ALT  $\leq 3.0 \times \text{ULN}$ \* (단, 간전이 또는 간세포암인 경우  $\leq 5 \times \text{ULN}$ )
- ⑥ Serum creatinine  $\leq 1.5 \times \text{ULN}$  (or CrCl  $\geq 60 \text{ mL/min}$  (by Cockcroft-Gault equation))

7. 이전 항암요법 및 치료

- ① 이전 항암화학요법  $\leq 5$  회
- ② 이전 항암요법(수술, 약물, 방사선치료 등)\*들의 가역적인 부작용들(reversible side effects)로부터 [CTCAE version 5.0] grade 1 또는 그보다 양호한 상태로 회복된 경우  
\*대수술(major surgery), 항암요법(antineoplastic therapy) 또는 실험적인 치료(experimental therapy), 조혈 부위의 직접적인 방사선요법은 베이스라인 이전 4주 이내에 적용(투여)받지 않았어야 하며, nitrosoureas 또는 mitomycin-C는 베이스라인 이전 6주 이내에 투여 받지 않았어야 함.

8. 본 임상시험에 대해 충분한 설명을 들은 후 자의로 참여를 결정하고 서면 동의한 자

9. 본 임상시험의 절차 및 제한 사항 등을 이해하고, 임상시험 참여기간 동안 이를 준수할 의사가 있는 자

## 제외기준

대상자는 다음 조건의 어느 하나라도 해당되는 경우 본 임상시험에 참여할 수 없다.

1. PHI-101의 주성분 또는 부형제에 대해 알려진 또는 의심되는 과민반응 또는 불내성(intolerance)이 있는 경우

2. 시험자가 판단하였을 때 본 임상시험 참여가 부적합 또는 불가능한 환자

3. 다음과 같은 심장기능 부전 또는 심혈관계 질환(단, 이에 국한되지 않는다)

- ① 베이스라인 이전 12주 이내에 발생한 심근허혈의 증거 또는 심근경색
- ② [NYHA Functional Classification]  $\geq \text{II}$
- ③ ECHO 또는 MUGA scan을 통해 확인된 LVEF  $< 50\%$
- ④ 임상적으로 유의한, 최적의 적절한 요법에 의해 조절되지 않는 심부정맥
- ⑤ Corrected QT (QTc)\* interval  $> 450 \text{ msec}$  (남/녀 동일), Long QT 증후군(또는 이의 가족력)  
\*Fridericia 공식에 의해 보정된 QT 간격(QTcF)을 이용한다. 단, 각차단(bundle branch block)이 있을 시 Bazett 공식으로 계산한다(QTcB).

4. 다음과 같은 약물 복용 또는 흡수에 영향을 주는 위장관 질환(단, 이에 국한되지 않는다)

- ① 연하곤란
- ② 장관마비, 장폐색
- ③ 약물 흡수에 임상적으로 유의한 영향을 주는 위장관 수술: 위절제술, 소장루, 광범위한 소장절제술 등(단, 단순 문합술은 제외된다)
- ④ 위장관계 전체 또는 소장을 침범하는 자가면역 및 염증성 질환: 셀리악병(coeliac disease), 장의 이식편대숙주질환, 베체트신드롬, 위장관을 침범한 경피증(scleroderma), 크론병(Crohn's disease), 궤양성 대장염(ulcerative colitis) 등

5. 다음과 같은 폐질환(단, 이에 국한되지 않는다)

- ① 새로이 시작된 또는 진행성의 호흡곤란, 기침 및 발열 증상이 있는 경우
- ② 간질성 폐질환 진단 대기 중인 환자 또는 간질성 폐렴
- ③ 폐섬유증

| Screen  | PROTOCOL    | SITE | SCREENING NO. |
|---------|-------------|------|---------------|
| 선정/제외기준 | PHI-101-002 |      |               |
| 전자서명    |             |      |               |

6. 림프종(lymphoma)을 포함한 혈액암(hematologic malignancy)

7. 다음과 같은 전이 환자

- ① 중추신경계전이 또는 뇌전이
- ② 골전이

8. 다음과 같은 감염질환(단, 이에 국한되지 않는다)

- ① 임상시험기간 중 안전성 및 유효성 평가에 영향을 줄 수 있는 항생제, 항바이러스제 등의 투여를 요하는 중증의 감염질환
- ② 최적의 적절한 요법에 의해 조절되지 않는 활성(현성) 감염질환으로 시험자가 판단하는 경우

9. 알려진 인체 면역결핍 바이러스(HIV) 양성

10. 활동성 B 형 간염\* 또는 활동성 C 형 간염\*\*

\*HBsAg 양성이면서 HBV DNA 가 검출됨. \*\*Anti-HCV 양성이면서 HCV RNA가 (정성적으로)검출됨

11. 서면동의일 기준 12주 이내의 의도하지 않은(unintentional) 체중 감소 > 10%인 경우

12. 서면동의일 기준 1년(52주) 이내의 알코올 또는 다른 약물의 남용 이력

13. 임상시험 참여기간 동안 임상시험용 의약품 외의 다른 항암요법\*이 필요한 경우(단, 기관지 폐쇄, 피부 병변 등의 완화를 목적으로 하는 국소 방사선 조사(point radiation)는 허용된다).

\*수술, 방사선(화학)요법, 항암화학요법, 표적요법제(저분자의약품, 단일클론항체), 면역항암제(생물학적제제), 또는 호르몬요법 등.

14. 다른 임상시험용 의약품이나 임상시험용 의료기기를 서면동의일 기준 2주 이내, 또는 이의 반감기의 5배에 해당하는 기간 이내(이중 더 짧은 기간)에 투여(적용) 받은 경우

15. 임상시험용 의약품의 동태(체내에서의 대사 및 배설 등) 또는 유효성과 안전성 평가에 유의한 영향을 미치는 약물(비처방약, 허브 또는 동종요법 등 포함)을 스크리닝 이전 2주 이내 투여 중인 것으로 시험자가 판단하는 경우

|      |             |      |               |
|------|-------------|------|---------------|
| C1D1 | PROTOCOL    | SITE | SCREENING NO. |
| 방문일  | PHI-101-002 |      |               |
| 전자서명 |             |      |               |

|                                   |                          |
|-----------------------------------|--------------------------|
| <b>방문일</b>                        |                          |
| 방문일                               | _____                    |
| Screen & Cycle1 D1(C1D1) 방문 동시 진행 | <input type="checkbox"/> |

|                                                                           |
|---------------------------------------------------------------------------|
| <b>선행/병용약물 확인</b>                                                         |
| 지난 방문과 비교하였을 때, 새롭게 투여되었거나 투여 용량이 변경된 병용약물이 있는 경우 선행/병용약물 페이지에 기록하여 주십시오. |

|                                                                                                                  |
|------------------------------------------------------------------------------------------------------------------|
| <b>이상반응 확인</b>                                                                                                   |
| 지난 방문과 비교하였을 때, 새롭게 발생한 이상반응이 있을 경우 이상반응 페이지에 기록하여 주십시오. (만약, EOT방문 전 새로운 항암요법이 수행되는 경우에는 해당 시점까지만 이상반응을 수집합니다.) |

| C1D1       | PROTOCOL    | SITE | SCREENING NO. |
|------------|-------------|------|---------------|
| 활력징후, 신체계측 | PHI-101-002 |      |               |
| 전자서명       |             |      |               |

| 활력징후                                                       |                                                      |
|------------------------------------------------------------|------------------------------------------------------|
| ND                                                         | <input type="checkbox"/> ND                          |
| 미실시인 경우 사유                                                 | _____<br>_____<br>_____                              |
| 5분 이상 안정을 취한 후 앉은 자세(좌위)에서 측정합니다.                          |                                                      |
| 측정일                                                        | _____                                                |
| 수축기 혈압                                                     | _ mmHg                                               |
| 이완기 혈압                                                     | _ mmHg                                               |
| 맥박                                                         | _ 회/분                                                |
| 호흡수                                                        | _ 회/분                                                |
| 체온                                                         | _ °C                                                 |
| 임상적으로 유의한 비정상 소견이 있습니까?                                    | <input type="radio"/> 예<br><input type="radio"/> 아니오 |
| 동역서 취득 이후 임상적으로 유의한 비정상 소견이 있을 경우, 비정상 소견은 '이상반응'에 기록하십시오. |                                                      |

| 신체계측       |                             |
|------------|-----------------------------|
| ND         | <input type="checkbox"/> ND |
| 미실시인 경우 사유 | _____<br>_____<br>_____     |
| 측정일        | _____                       |
| 체중         | _ kg                        |

|      |             |      |               |
|------|-------------|------|---------------|
| C1D1 | PROTOCOL    | SITE | SCREENING NO. |
| 신체검진 | PHI-101-002 |      |               |
| 전자서명 |             |      |               |

|                                                            |                                                                                             |                                                   |
|------------------------------------------------------------|---------------------------------------------------------------------------------------------|---------------------------------------------------|
| <b>신체검진</b>                                                |                                                                                             |                                                   |
| ND                                                         | <input type="checkbox"/> ND                                                                 |                                                   |
| 미 실시인 경우 사유                                                | <hr/> <hr/> <hr/>                                                                           |                                                   |
| 검진일                                                        | _____                                                                                       |                                                   |
| 지난 방문과 비교하였을 때, 각 신체기관 검진 결과 새로운 비정상 소견이 있습니까?             | <input type="radio"/> 예 → <u>아래 표에 신체기관 및 상세내용을 기재하여 주십시오.</u><br><input type="radio"/> 아니오 |                                                   |
| 동의를 취득 이후 임상적으로 유의한 비정상 소견이 있을 경우, 비정상 소견은 '이상반응'에 기록하십시오. |                                                                                             |                                                   |
| No                                                         | 신체기관                                                                                        | 임상적 유의성                                           |
| 1                                                          | _____▼                                                                                      | <input type="radio"/> 예 <input type="radio"/> 아니오 |
| 신체기관                                                       | 외관, 피부, 두/경부, 흉부/폐, 심장, 복부, 비뇨/생식계, 사지, 근골격계, 신경계, 림프절, 기타                                  |                                                   |
| 신체기관_기타                                                    | <hr/> <hr/> <hr/>                                                                           |                                                   |

|         |             |      |               |
|---------|-------------|------|---------------|
| C1D1    | PROTOCOL    | SITE | SCREENING NO. |
| ECOG PS | PHI-101-002 |      |               |
| 전자서명    |             |      |               |

| ECOG PS    |                                                                                                                                                                                                    |
|------------|----------------------------------------------------------------------------------------------------------------------------------------------------------------------------------------------------|
| ND         | <input type="checkbox"/> ND                                                                                                                                                                        |
| 미실시인 경우 사유 | <hr/> <hr/> <hr/>                                                                                                                                                                                  |
| 평가일        | _____                                                                                                                                                                                              |
| ECOG PS    | <input type="radio"/> Grade 0<br><input type="radio"/> Grade 1<br><input type="radio"/> Grade 2<br><input type="radio"/> Grade 3<br><input type="radio"/> Grade 4<br><input type="radio"/> Grade 5 |



|      |             |      |               |
|------|-------------|------|---------------|
| C1D1 | PROTOCOL    | SITE | SCREENING NO. |
| 임신검사 | PHI-101-002 |      |               |
| 전자서명 |             |      |               |

| 임신검사                     |                                                                    |
|--------------------------|--------------------------------------------------------------------|
| ND                       | <input type="checkbox"/> ND                                        |
| 미실시인 경우 사유               | _____<br>_____<br>_____                                            |
| 검사일                      | _____                                                              |
| 검사 방법                    | <input type="radio"/> urine-hCG<br><input type="radio"/> serum-hCG |
| 검사결과                     | <input type="radio"/> 양성<br><input type="radio"/> 음성               |
| serum-hCG 검사 방법으로 실시합니다. |                                                                    |

|        |             |      |               |
|--------|-------------|------|---------------|
| C1D1   | PROTOCOL    | SITE | SCREENING NO. |
| 실험실 검사 | PHI-101-002 |      |               |
| 전자서명   |             |      |               |

| 실험실 검사                                                                                                                                                                                                            |                             |
|-------------------------------------------------------------------------------------------------------------------------------------------------------------------------------------------------------------------|-----------------------------|
| ND                                                                                                                                                                                                                | <input type="checkbox"/> ND |
| 미실시인 경우 사유                                                                                                                                                                                                        | _____<br>_____<br>_____     |
| 최소 8시간 금식 여부                                                                                                                                                                                                      | ○ 예<br>○ 아니오                |
| 검체 채취일                                                                                                                                                                                                            | _____                       |
| <p>* 베이스라인(C1D1) 방문이 Screen 방문으로부터 7일 이내일 경우, Screen검사 결과로 대체 할 수 있습니다.<br/> * 동의서 취득 이후 검사 결과가 'Clinical Significance' 일 경우 비정상 소견은 '이상반응'에 기록하십시오.<br/> * 검사 항목별 단위는 "정상 참고 범위"와 함께 제공되므로 아래 결과에 기록하지 않습니다.</p> |                             |

| Hematology  |                             |            |           |
|-------------|-----------------------------|------------|-----------|
| ND          | <input type="checkbox"/> ND |            |           |
| 검사항목        | 결과                          | 정상 여부      | 임상적 유의성   |
| WBC         | _____                       | ○ 정상 ○ 비정상 | ○ 예 ○ 아니오 |
| RBC         | _____                       | ○ 정상 ○ 비정상 | ○ 예 ○ 아니오 |
| Hemoglobin  | _____                       | ○ 정상 ○ 비정상 | ○ 예 ○ 아니오 |
| Hematocrit  | _____                       | ○ 정상 ○ 비정상 | ○ 예 ○ 아니오 |
| Platelet    | _____                       | ○ 정상 ○ 비정상 | ○ 예 ○ 아니오 |
| MCV         | _____                       | ○ 정상 ○ 비정상 | ○ 예 ○ 아니오 |
| MCH         | _____                       | ○ 정상 ○ 비정상 | ○ 예 ○ 아니오 |
| MCHC        | _____                       | ○ 정상 ○ 비정상 | ○ 예 ○ 아니오 |
| Neutrophils | _____                       | ○ 정상 ○ 비정상 | ○ 예 ○ 아니오 |

|        |             |      |               |
|--------|-------------|------|---------------|
| C1D1   | PROTOCOL    | SITE | SCREENING NO. |
| 실험실 검사 | PHI-101-002 |      |               |
| 전자서명   |             |      |               |

| 검사항목        | 결과    | 정상 여부                                              | 임상적 유의성                                           |
|-------------|-------|----------------------------------------------------|---------------------------------------------------|
| Lymphocytes | _____ | <input type="radio"/> 정상 <input type="radio"/> 비정상 | <input type="radio"/> 예 <input type="radio"/> 아니오 |
| Monocytes   | _____ | <input type="radio"/> 정상 <input type="radio"/> 비정상 | <input type="radio"/> 예 <input type="radio"/> 아니오 |
| Eosinophils | _____ | <input type="radio"/> 정상 <input type="radio"/> 비정상 | <input type="radio"/> 예 <input type="radio"/> 아니오 |
| Basophils   | _____ | <input type="radio"/> 정상 <input type="radio"/> 비정상 | <input type="radio"/> 예 <input type="radio"/> 아니오 |
| ANC         | _____ | <input type="radio"/> 정상 <input type="radio"/> 비정상 | <input type="radio"/> 예 <input type="radio"/> 아니오 |

| Chemistry       |                             |                                                    |                                                   |
|-----------------|-----------------------------|----------------------------------------------------|---------------------------------------------------|
| ND              | <input type="checkbox"/> ND |                                                    |                                                   |
| 검사항목            | 결과                          | 정상 여부                                              | 임상적 유의성                                           |
| BUN             | _____                       | <input type="radio"/> 정상 <input type="radio"/> 비정상 | <input type="radio"/> 예 <input type="radio"/> 아니오 |
| Creatinine      | _____                       | <input type="radio"/> 정상 <input type="radio"/> 비정상 | <input type="radio"/> 예 <input type="radio"/> 아니오 |
| Total bilirubin | _____                       | <input type="radio"/> 정상 <input type="radio"/> 비정상 | <input type="radio"/> 예 <input type="radio"/> 아니오 |
| AST             | _____                       | <input type="radio"/> 정상 <input type="radio"/> 비정상 | <input type="radio"/> 예 <input type="radio"/> 아니오 |
| ALT             | _____                       | <input type="radio"/> 정상 <input type="radio"/> 비정상 | <input type="radio"/> 예 <input type="radio"/> 아니오 |
| ALP             | _____                       | <input type="radio"/> 정상 <input type="radio"/> 비정상 | <input type="radio"/> 예 <input type="radio"/> 아니오 |
| γGT             | _____                       | <input type="radio"/> 정상 <input type="radio"/> 비정상 | <input type="radio"/> 예 <input type="radio"/> 아니오 |
| LDH             | _____                       | <input type="radio"/> 정상 <input type="radio"/> 비정상 | <input type="radio"/> 예 <input type="radio"/> 아니오 |
| Total protein   | _____                       | <input type="radio"/> 정상 <input type="radio"/> 비정상 | <input type="radio"/> 예 <input type="radio"/> 아니오 |
| Albumin         | _____                       | <input type="radio"/> 정상 <input type="radio"/> 비정상 | <input type="radio"/> 예 <input type="radio"/> 아니오 |
| Globulin[자동계산]  | _____                       | <input type="radio"/> 정상 <input type="radio"/> 비정상 | <input type="radio"/> 예 <input type="radio"/> 아니오 |

|        |             |      |               |
|--------|-------------|------|---------------|
| C1D1   | PROTOCOL    | SITE | SCREENING NO. |
| 실험실 검사 | PHI-101-002 |      |               |
| 전자서명   |             |      |               |

| 검사항목              | 결과    | 정상 여부                                              | 임상적 유의성                                           |
|-------------------|-------|----------------------------------------------------|---------------------------------------------------|
| Ca                | _____ | <input type="radio"/> 정상 <input type="radio"/> 비정상 | <input type="radio"/> 예 <input type="radio"/> 아니오 |
| Mg                | _____ | <input type="radio"/> 정상 <input type="radio"/> 비정상 | <input type="radio"/> 예 <input type="radio"/> 아니오 |
| Na                | _____ | <input type="radio"/> 정상 <input type="radio"/> 비정상 | <input type="radio"/> 예 <input type="radio"/> 아니오 |
| K                 | _____ | <input type="radio"/> 정상 <input type="radio"/> 비정상 | <input type="radio"/> 예 <input type="radio"/> 아니오 |
| Cl                | _____ | <input type="radio"/> 정상 <input type="radio"/> 비정상 | <input type="radio"/> 예 <input type="radio"/> 아니오 |
| P                 | _____ | <input type="radio"/> 정상 <input type="radio"/> 비정상 | <input type="radio"/> 예 <input type="radio"/> 아니오 |
| Total cholesterol | _____ | <input type="radio"/> 정상 <input type="radio"/> 비정상 | <input type="radio"/> 예 <input type="radio"/> 아니오 |
| Triglyceride      | _____ | <input type="radio"/> 정상 <input type="radio"/> 비정상 | <input type="radio"/> 예 <input type="radio"/> 아니오 |
| CPK               | _____ | <input type="radio"/> 정상 <input type="radio"/> 비정상 | <input type="radio"/> 예 <input type="radio"/> 아니오 |
| Glucose           | _____ | <input type="radio"/> 정상 <input type="radio"/> 비정상 | <input type="radio"/> 예 <input type="radio"/> 아니오 |
| CrCl[자동계산]        | _____ |                                                    |                                                   |

| Urinalysis       |                             |                                                    |                                                   |
|------------------|-----------------------------|----------------------------------------------------|---------------------------------------------------|
| ND               | <input type="checkbox"/> ND |                                                    |                                                   |
| 검사항목             | 결과                          | 정상 여부                                              | 임상적 유의성                                           |
| Specific gravity | _____                       | <input type="radio"/> 정상 <input type="radio"/> 비정상 | <input type="radio"/> 예 <input type="radio"/> 아니오 |
| pH               | _____                       | <input type="radio"/> 정상 <input type="radio"/> 비정상 | <input type="radio"/> 예 <input type="radio"/> 아니오 |
| Bilirubin[U]     | _____                       | <input type="radio"/> 정상 <input type="radio"/> 비정상 | <input type="radio"/> 예 <input type="radio"/> 아니오 |
| Urobilinogen[U]  | _____                       | <input type="radio"/> 정상 <input type="radio"/> 비정상 | <input type="radio"/> 예 <input type="radio"/> 아니오 |
| Blood[U]         | _____                       | <input type="radio"/> 정상 <input type="radio"/> 비정상 | <input type="radio"/> 예 <input type="radio"/> 아니오 |

|        |             |      |               |
|--------|-------------|------|---------------|
| C1D1   | PROTOCOL    | SITE | SCREENING NO. |
| 실험실 검사 | PHI-101-002 |      |               |
| 전자서명   |             |      |               |

| 검사항목                | 결과    | 정상 여부                                              | 임상적 유의성                                           |
|---------------------|-------|----------------------------------------------------|---------------------------------------------------|
| Glucose[U]          | _____ | <input type="radio"/> 정상 <input type="radio"/> 비정상 | <input type="radio"/> 예 <input type="radio"/> 아니오 |
| Protein[U] (Alb[U]) | _____ | <input type="radio"/> 정상 <input type="radio"/> 비정상 | <input type="radio"/> 예 <input type="radio"/> 아니오 |
| Ketones[U]          | _____ | <input type="radio"/> 정상 <input type="radio"/> 비정상 | <input type="radio"/> 예 <input type="radio"/> 아니오 |
| Leukocytes[U]       | _____ | <input type="radio"/> 정상 <input type="radio"/> 비정상 | <input type="radio"/> 예 <input type="radio"/> 아니오 |

| Thyroid Function Tests |                             |                                                    |                                                   |
|------------------------|-----------------------------|----------------------------------------------------|---------------------------------------------------|
| ND                     | <input type="checkbox"/> ND |                                                    |                                                   |
| 검사항목                   | 결과                          | 정상 여부                                              | 임상적 유의성                                           |
| TSH                    | _____                       | <input type="radio"/> 정상 <input type="radio"/> 비정상 | <input type="radio"/> 예 <input type="radio"/> 아니오 |
| Free T4                | _____                       | <input type="radio"/> 정상 <input type="radio"/> 비정상 | <input type="radio"/> 예 <input type="radio"/> 아니오 |

| Tests for HbA1c |                             |                                                    |                                                   |
|-----------------|-----------------------------|----------------------------------------------------|---------------------------------------------------|
| ND              | <input type="checkbox"/> ND |                                                    |                                                   |
| 검사항목            | 결과                          | 정상 여부                                              | 임상적 유의성                                           |
| HbA1c           | _____                       | <input type="radio"/> 정상 <input type="radio"/> 비정상 | <input type="radio"/> 예 <input type="radio"/> 아니오 |

| Coagulation Profile |                             |                                                    |                                                   |
|---------------------|-----------------------------|----------------------------------------------------|---------------------------------------------------|
| ND                  | <input type="checkbox"/> ND |                                                    |                                                   |
| 검사항목                | 결과                          | 정상 여부                                              | 임상적 유의성                                           |
| PT INR              | _____                       | <input type="radio"/> 정상 <input type="radio"/> 비정상 | <input type="radio"/> 예 <input type="radio"/> 아니오 |
| aPTT                | _____                       | <input type="radio"/> 정상 <input type="radio"/> 비정상 | <input type="radio"/> 예 <input type="radio"/> 아니오 |

|             |             |      |               |
|-------------|-------------|------|---------------|
| C1D1        | PROTOCOL    | SITE | SCREENING NO. |
| 12-Lead ECG | PHI-101-002 |      |               |
| 전자서명        |             |      |               |

| 12-Lead ECG                                                                                                                                                                                                       |            |                                                      |              |             |              |              |
|-------------------------------------------------------------------------------------------------------------------------------------------------------------------------------------------------------------------|------------|------------------------------------------------------|--------------|-------------|--------------|--------------|
| ND                                                                                                                                                                                                                |            | <input type="checkbox"/> ND                          |              |             |              |              |
| 미실시인 경우 사유                                                                                                                                                                                                        |            | _____<br>_____<br>_____                              |              |             |              |              |
| 검사일                                                                                                                                                                                                               |            | _____                                                |              |             |              |              |
| 측정횟수                                                                                                                                                                                                              |            | <input type="radio"/> 1회<br><input type="radio"/> 3회 |              |             |              |              |
| BBB 여부                                                                                                                                                                                                            |            | <input type="radio"/> 예<br><input type="radio"/> 아니오 |              |             |              |              |
| No.                                                                                                                                                                                                               | Heart Rate | PR Interval                                          | QRS Duration | QT Interval | QTcB [자동 계산] | QTcF [자동 계산] |
| 1차                                                                                                                                                                                                                | __ bpm     | __ msec                                              | __ msec      | __ msec     | __           | __           |
| 2차                                                                                                                                                                                                                | __ bpm     | __ msec                                              | __ msec      | __ msec     | __           | __           |
| 3차                                                                                                                                                                                                                | __ bpm     | __ msec                                              | __ msec      | __ msec     | __           | __           |
| QTcB 평균[자동계산]                                                                                                                                                                                                     |            | __                                                   |              |             |              |              |
| QTcF 평균[자동계산]                                                                                                                                                                                                     |            | __                                                   |              |             |              |              |
| 임상적으로 유의한 비정상 소견이 있습니까?                                                                                                                                                                                           |            | <input type="radio"/> 예<br><input type="radio"/> 아니오 |              |             |              |              |
| * 동의서 취득 이후 임상적으로 유의한 비정상 소견이 있을 경우, 비정상 소견은 '이상반응'에 기록하십시오.<br>* Screen, C1D1 시점에서는 3회 측정하고, 이후 주기에서는 1회만 수행합니다.<br>(단, ECG를 통해 QT 간격 연장이 입증된 경우, 단기간(즉시)에 추가로 2개의 ECG를 수행하여 최종 3개 ECG의 평균 QTc interval을 확인합니다.) |            |                                                      |              |             |              |              |

| C1D1              | PROTOCOL    | SITE | SCREENING NO. |
|-------------------|-------------|------|---------------|
| ECHO 또는 MUGA scan | PHI-101-002 |      |               |
| 전자서명              |             |      |               |

| ECHO 또는 MUGA scan                                            |                                                               |
|--------------------------------------------------------------|---------------------------------------------------------------|
| ND                                                           | <input type="checkbox"/> ND                                   |
| 미실시인 경우 사유                                                   | _____<br>_____<br>_____                                       |
| 검사일                                                          | _____                                                         |
| 검사 방법                                                        | <input type="radio"/> ECHO<br><input type="radio"/> MUGA scan |
| 좌심실구출률(LVEF)                                                 | ___ %                                                         |
| 임상적으로 유의한 비정상 소견이 있습니까?                                      | <input type="radio"/> 예<br><input type="radio"/> 아니오          |
| * 동의서 취득 이후 임상적으로 유의한 비정상 소견이 있을 경우, 비정상 소견은 '이상반응'에 기록하십시오. |                                                               |

| C1D1    | PROTOCOL    | SITE | SCREENING NO. |
|---------|-------------|------|---------------|
| 선정/제외기준 | PHI-101-002 |      |               |
| 전자서명    |             |      |               |

| 시험대상자 적합성                                 |                                                                                                                                                                   |
|-------------------------------------------|-------------------------------------------------------------------------------------------------------------------------------------------------------------------|
| 상기 시험대상자는 선정/제외 기준을 만족하고, 임상시험 참여에 적합합니까? | <input type="radio"/> 예<br><input type="radio"/> 아니오                                                                                                              |
| 탈락사유                                      | <input type="radio"/> 선정/제외기준 부적합 → <a href="#">Specify below</a><br><input type="radio"/> 시험대상자 동의철회<br><input type="radio"/> 기타 → <a href="#">Specify below</a> |
| 탈락사유 상세                                   | <hr/> <hr/> <hr/>                                                                                                                                                 |

| 선정기준                                                                                                                                                                                                                                                                                                                                                                                                                                                                                                                                                                                                                                                    |
|---------------------------------------------------------------------------------------------------------------------------------------------------------------------------------------------------------------------------------------------------------------------------------------------------------------------------------------------------------------------------------------------------------------------------------------------------------------------------------------------------------------------------------------------------------------------------------------------------------------------------------------------------------|
| 대상자는 다음의 모든 기준에 적격하여야 본 임상에 참여할 수 있다.                                                                                                                                                                                                                                                                                                                                                                                                                                                                                                                                                                                                                   |
| 1. 서면동의일 기준으로 만 19세 이상의 여성                                                                                                                                                                                                                                                                                                                                                                                                                                                                                                                                                                                                                              |
| 2. 임신(임신가능성, 임신계획), 수유 여부<br>① 비가임 여성, 임신 또는 수유 중이 아닌 여성, 임상시험 기간 동안 임신계획이 없는 여성<br>② 가임 여성인 경우, 스크리닝 기간 및 PHI-101 투여 직전의 임신반응검사서 음성으로 확인되고, 본 계획서에서 요구하는 효과적인 피임법을 PHI-101의 마지막 투여 후 6개월(24주)간 준수하기로 동의한 경우                                                                                                                                                                                                                                                                                                                                                                                                                                            |
| 3. 대상질환<br>① 조직학적(histologically) 또는 세포학적(cytologically)으로 확인된 난소암, 난관암 또는 원발성 복막암<br>② 국소조직학적 소견(local histopathological findings)으로 진단된 상피성암(epithelial malignant tumors) [WHO Histological Classification, 2014]<br>: 단, 흔하지 않는 난소 조직병리(LCOH)로 분류되는, 저등급장액성난소암(LGSC), 점액성난소암(mucinous carcinoma of the ovary), 암육종(악성혼합뿔러종양[MMMT]), 경계성상피성난소종양(저악성암종[LAP]) 제외 [NCCN Guideline version 2.2019]<br>③ 백금불응성암* 또는 백금저항성암**<br>*백금기반 항암요법 진행중, 질병이 진행함, **백금기반 항암요법 완료 후, 6개월(24주) 이내에 질병이 진행함<br>④ 현재 임상적 이익이 있는 것으로 알려진 표준치료법에 대해 불응하거나, 받을 수 없거나, 거부한 자로 수술이 불가능한 경우<br>⑤ [RECIST version 1.1]에 부합하는, 최소 한 개 이상의 측정 가능한 병변 또는 측정 불가하나 평가 가능한 병변을 가진 경우 |
| 4. 예상 생존기간 ≥ 12주                                                                                                                                                                                                                                                                                                                                                                                                                                                                                                                                                                                                                                        |
| 5. [ECOG PS] ≤ 1                                                                                                                                                                                                                                                                                                                                                                                                                                                                                                                                                                                                                                        |



| C1D1    | PROTOCOL    | SITE | SCREENING NO. |
|---------|-------------|------|---------------|
| 선정/제외기준 | PHI-101-002 |      |               |
| 전자서명    |             |      |               |

6. 다음의 실험실적 검사를 통해 적절한 간, 신장, 혈액학적 기능이 확인된 자(스크리닝 기간 동안 재검 가능하다)
- ① ANC  $\geq 1,500/\text{mm}^3$  (단, 베이스라인 이전 2주 이내에 G-CSF 투여 없이)
  - ② Hb  $\geq 10.0 \text{ g/dL}$  (단, 베이스라인 이전 2주 이내에 수혈 없이)
  - ③ Platelet count  $\geq 75,000/\text{mm}^3$  (단, 베이스라인 이전 2주 이내에 수혈 없이)
  - ④ Total bilirubin  $\leq 1.5 \times \text{ULN}$
  - ⑤ AST and ALT  $\leq 3.0 \times \text{ULN}$ \* (단, 간전이 또는 간세포암인 경우  $\leq 5 \times \text{ULN}$ )
  - ⑥ Serum creatinine  $\leq 1.5 \times \text{ULN}$  (or CrCl  $\geq 60 \text{ mL/min}$  (by Cockcroft-Gault equation))

7. 이전 항암요법 및 치료

- ① 이전 항암화학요법  $\leq 5$  회
  - ② 이전 항암요법(수술, 약물, 방사선치료 등)\*들의 가역적인 부작용들(reversible side effects)로부터 [CTCAE version 5.0] grade 1 또는 그보다 양호한 상태로 회복된 경우
- \*대수술(major surgery), 항암요법(antineoplastic therapy) 또는 실험적인 치료(experimental therapy), 조혈 부위의 직접적인 방사선요법은 베이스라인 이전 4주 이내에 적용(투여)받지 않았어야 하며, nitrosoureas 또는 mitomycin-C는 베이스라인 이전 6주 이내에 투여 받지 않았어야 함.

8. 본 임상시험에 대해 충분한 설명을 들은 후 자의로 참여를 결정하고 서면 동의한 자

9. 본 임상시험의 절차 및 제한 사항 등을 이해하고, 임상시험 참여기간 동안 이를 준수할 의사가 있는 자

### 제외기준

대상자는 다음 조건의 어느 하나라도 해당되는 경우 본 임상시험에 참여할 수 없다.

1. PHI-101의 주성분 또는 부형제에 대해 알려진 또는 의심되는 과민반응 또는 불내성(intolerance)이 있는 경우

2. 시험자가 판단하였을 때 본 임상시험 참여가 부적합 또는 불가능한 환자

3. 다음과 같은 심장기능 부전 또는 심혈관계 질환(단, 이에 국한되지 않는다)

- ① 베이스라인 이전 12주 이내에 발생한 심근허혈의 증거 또는 심근경색
  - ② [NYHA Functional Classification]  $\geq \text{II}$
  - ③ ECHO 또는 MUGA scan을 통해 확인된 LVEF  $< 50\%$
  - ④ 임상적으로 유의한, 최적의 적절한 요법에 의해 조절되지 않는 심부정맥
  - ⑤ Corrected QT (QTc)\* interval  $> 450 \text{ msec}$  (남/녀 동일), Long QT 증후군(또는 이의 가족력)
- \*Fridericia 공식에 의해 보정된 QT 간격(QTcF)을 이용한다. 단, 각차단(bundle branch block)이 있을 시 Bazett 공식으로 계산한다(QTcB).

4. 다음과 같은 약물 복용 또는 흡수에 영향을 주는 위장관 질환(단, 이에 국한되지 않는다)

- ① 연하곤란
- ② 장관마비, 장폐색
- ③ 약물 흡수에 임상적으로 유의한 영향을 주는 위장관 수술: 위절제술, 소장루, 광범위한 소장절제술 등(단, 단순 문합술은 제외된다)
- ④ 위장관계 전체 또는 소장을 침범하는 자가면역 및 염증성 질환: 셀리악병(coeliac disease), 장의 이식편대숙주질환, 베체트신드롬, 위장관을 침범한 경피증(scleroderma), 크론병(Crohn's disease), 궤양성 대장염(ulcerative colitis) 등

5. 다음과 같은 폐질환(단, 이에 국한되지 않는다)

- ① 새로이 시작된 또는 진행성의 호흡곤란, 기침 및 발열 증상이 있는 경우
- ② 간질성 폐질환 진단 대기 중인 환자 또는 간질성 폐렴
- ③ 폐섬유증

| C1D1    | PROTOCOL    | SITE | SCREENING NO. |
|---------|-------------|------|---------------|
| 선정/제외기준 | PHI-101-002 |      |               |
| 전자서명    |             |      |               |

6. 림프종(lymphoma)을 포함한 혈액암(hematologic malignancy)
7. 다음과 같은 전이 환자  
 ① 중추신경계전이 또는 뇌전이  
 ② 골전이
8. 다음과 같은 감염질환(단, 이에 국한되지 않는다)  
 ① 임상시험기간 중 안전성 및 유효성 평가에 영향을 줄 수 있는 항생제, 항바이러스제 등의 투여를 요하는 중증의 감염질환  
 ② 최적의 적절한 요법에 의해 조절되지 않는 활성(현성) 감염질환으로 시험자가 판단하는 경우
9. 알려진 인체 면역결핍 바이러스(HIV) 양성
10. 활동성 B 형 간염\* 또는 활동성 C 형 간염\*\*  
 \*HBsAg 양성인면서 HBV DNA 가 검출됨. \*\*Anti-HCV 양성인면서 HCV RNA가 (정성적으로)검출됨
11. 서면동의일 기준 12주 이내의 의도하지 않은(unintentional) 체중 감소 > 10%인 경우
12. 서면동의일 기준 1년(52주) 이내의 알코올 또는 다른 약물의 남용 이력
13. 임상시험 참여기간 동안 임상시험용 의약품 외의 다른 항암요법\*이 필요한 경우(단, 기관지 폐쇄, 피부 병변 등의 완화를 목적으로 하는 국소 방사선 조사(point radiation)는 허용된다).  
 \*수술, 방사선(화학)요법, 항암화학요법, 표적요법제(저분자의약품, 단일클론항체), 면역항암제(생물학적제제), 또는 호르몬요법 등.
14. 다른 임상시험용 의약품이나 임상시험용 의료기기를 서면동의일 기준 2주 이내, 또는 이의 반감기의 5배에 해당하는 기간 이내(이중 더 짧은 기간)에 투여(적용) 받은 경우
15. 임상시험용 의약품의 동태(체내에서의 대사 및 배설 등) 또는 유효성과 안전성 평가에 유의한 영향을 미치는 약물(비처방약, 허브 또는 동종요법 등 포함)을 스크리닝 이전 2주 이내 투여 중인 것으로 시험자가 판단하는 경우

|       |             |      |               |
|-------|-------------|------|---------------|
| C1D1  | PROTOCOL    | SITE | SCREENING NO. |
| PK 채혈 | PHI-101-002 |      |               |
| 전자서명  |             |      |               |

| PK 채혈              |                             |       |       |
|--------------------|-----------------------------|-------|-------|
| ND                 | <input type="checkbox"/> ND |       |       |
| 미실시인 경우 사유         | <hr/> <hr/> <hr/>           |       |       |
| PHI-101 투약일        | _____                       |       |       |
| PHI-101 투약시간       | _____                       |       |       |
| 채혈 시점              | ND                          | 채혈일   | 채혈 시간 |
| 투여 전(-30분)         | <input type="checkbox"/>    | _____ | _____ |
| 투여 후 0.5 시간(±5분)   | <input type="checkbox"/>    | _____ | _____ |
| 투여 후 1 시간(±5분)     | <input type="checkbox"/>    | _____ | _____ |
| 투여 후 2 시간(±0.25시간) | <input type="checkbox"/>    | _____ | _____ |
| 투여 후 4 시간(±0.5시간)  | <input type="checkbox"/>    | _____ | _____ |
| 투여 후 6 시간(±0.5시간)  | <input type="checkbox"/>    | _____ | _____ |
| 투여 후 8 시간(±0.5시간)  | <input type="checkbox"/>    | _____ | _____ |
| 투여 후 24 시간(±1시간)   | <input type="checkbox"/>    | _____ | _____ |

|      |             |      |               |
|------|-------------|------|---------------|
| C1D8 | PROTOCOL    | SITE | SCREENING NO. |
| 방문일  | PHI-101-002 |      |               |
| 전자서명 |             |      |               |

|            |       |
|------------|-------|
| <b>방문일</b> |       |
| 방문일        | _____ |

|                                                                           |
|---------------------------------------------------------------------------|
| <b>선행/병용약물 확인</b>                                                         |
| 지난 방문과 비교하였을 때, 새롭게 투여되었거나 투여 용량이 변경된 병용약물이 있는 경우 선행/병용약물 페이지에 기록하여 주십시오. |

|                                                                                                                     |
|---------------------------------------------------------------------------------------------------------------------|
| <b>이상반응 확인</b>                                                                                                      |
| 지난 방문과 비교하였을 때, 새롭게 발생한 이상반응이 있을 경우 이상반응 페이지에 기록하여 주십시오.<br>(만약, EOT방문 전 새로운 항암요법이 수행되는 경우에는 해당 시점까지만 이상반응을 수집합니다.) |

|        |             |      |               |
|--------|-------------|------|---------------|
| C1D8   | PROTOCOL    | SITE | SCREENING NO. |
| 실험실 검사 | PHI-101-002 |      |               |
| 전자서명   |             |      |               |

| 실험실 검사                                                                                                                                            |                                                      |
|---------------------------------------------------------------------------------------------------------------------------------------------------|------------------------------------------------------|
| ND                                                                                                                                                | <input type="checkbox"/> ND                          |
| 미실시인 경우 사유                                                                                                                                        | _____<br>_____<br>_____                              |
| 최소 8시간 금식 여부                                                                                                                                      | <input type="radio"/> 예<br><input type="radio"/> 아니오 |
| 검체 채취일                                                                                                                                            | _____                                                |
| <p>* 동의서 취득 이후 검사 결과가 'Clinical Significance' 일 경우 비정상 소견은 '이상반응'에 기록하십시오.<br/>           * 검사 항목별 단위는 "정상 참고 범위"와 함께 제공되므로 아래 결과에 기록하지 않습니다.</p> |                                                      |

| Hematology  |                             |                                                    |                                                   |
|-------------|-----------------------------|----------------------------------------------------|---------------------------------------------------|
| ND          | <input type="checkbox"/> ND |                                                    |                                                   |
| 검사항목        | 결과                          | 정상 여부                                              | 임상적 유의성                                           |
| WBC         | _____                       | <input type="radio"/> 정상 <input type="radio"/> 비정상 | <input type="radio"/> 예 <input type="radio"/> 아니오 |
| RBC         | _____                       | <input type="radio"/> 정상 <input type="radio"/> 비정상 | <input type="radio"/> 예 <input type="radio"/> 아니오 |
| Hemoglobin  | _____                       | <input type="radio"/> 정상 <input type="radio"/> 비정상 | <input type="radio"/> 예 <input type="radio"/> 아니오 |
| Hematocrit  | _____                       | <input type="radio"/> 정상 <input type="radio"/> 비정상 | <input type="radio"/> 예 <input type="radio"/> 아니오 |
| Platelet    | _____                       | <input type="radio"/> 정상 <input type="radio"/> 비정상 | <input type="radio"/> 예 <input type="radio"/> 아니오 |
| MCV         | _____                       | <input type="radio"/> 정상 <input type="radio"/> 비정상 | <input type="radio"/> 예 <input type="radio"/> 아니오 |
| MCH         | _____                       | <input type="radio"/> 정상 <input type="radio"/> 비정상 | <input type="radio"/> 예 <input type="radio"/> 아니오 |
| MCHC        | _____                       | <input type="radio"/> 정상 <input type="radio"/> 비정상 | <input type="radio"/> 예 <input type="radio"/> 아니오 |
| Neutrophils | _____                       | <input type="radio"/> 정상 <input type="radio"/> 비정상 | <input type="radio"/> 예 <input type="radio"/> 아니오 |

|        |             |      |               |
|--------|-------------|------|---------------|
| C1D8   | PROTOCOL    | SITE | SCREENING NO. |
| 실험실 검사 | PHI-101-002 |      |               |
| 전자서명   |             |      |               |

| 검사항목        | 결과    | 정상 여부                                              | 임상적 유의성                                           |
|-------------|-------|----------------------------------------------------|---------------------------------------------------|
| Lymphocytes | _____ | <input type="radio"/> 정상 <input type="radio"/> 비정상 | <input type="radio"/> 예 <input type="radio"/> 아니오 |
| Monocytes   | _____ | <input type="radio"/> 정상 <input type="radio"/> 비정상 | <input type="radio"/> 예 <input type="radio"/> 아니오 |
| Eosinophils | _____ | <input type="radio"/> 정상 <input type="radio"/> 비정상 | <input type="radio"/> 예 <input type="radio"/> 아니오 |
| Basophils   | _____ | <input type="radio"/> 정상 <input type="radio"/> 비정상 | <input type="radio"/> 예 <input type="radio"/> 아니오 |
| ANC         | _____ | <input type="radio"/> 정상 <input type="radio"/> 비정상 | <input type="radio"/> 예 <input type="radio"/> 아니오 |

| Chemistry       |                             |                                                    |                                                   |
|-----------------|-----------------------------|----------------------------------------------------|---------------------------------------------------|
| ND              | <input type="checkbox"/> ND |                                                    |                                                   |
| 검사항목            | 결과                          | 정상 여부                                              | 임상적 유의성                                           |
| BUN             | _____                       | <input type="radio"/> 정상 <input type="radio"/> 비정상 | <input type="radio"/> 예 <input type="radio"/> 아니오 |
| Creatinine      | _____                       | <input type="radio"/> 정상 <input type="radio"/> 비정상 | <input type="radio"/> 예 <input type="radio"/> 아니오 |
| Total bilirubin | _____                       | <input type="radio"/> 정상 <input type="radio"/> 비정상 | <input type="radio"/> 예 <input type="radio"/> 아니오 |
| AST             | _____                       | <input type="radio"/> 정상 <input type="radio"/> 비정상 | <input type="radio"/> 예 <input type="radio"/> 아니오 |
| ALT             | _____                       | <input type="radio"/> 정상 <input type="radio"/> 비정상 | <input type="radio"/> 예 <input type="radio"/> 아니오 |
| ALP             | _____                       | <input type="radio"/> 정상 <input type="radio"/> 비정상 | <input type="radio"/> 예 <input type="radio"/> 아니오 |
| γGT             | _____                       | <input type="radio"/> 정상 <input type="radio"/> 비정상 | <input type="radio"/> 예 <input type="radio"/> 아니오 |
| LDH             | _____                       | <input type="radio"/> 정상 <input type="radio"/> 비정상 | <input type="radio"/> 예 <input type="radio"/> 아니오 |
| Total protein   | _____                       | <input type="radio"/> 정상 <input type="radio"/> 비정상 | <input type="radio"/> 예 <input type="radio"/> 아니오 |
| Albumin         | _____                       | <input type="radio"/> 정상 <input type="radio"/> 비정상 | <input type="radio"/> 예 <input type="radio"/> 아니오 |
| Globulin[자동계산]  | _____                       | <input type="radio"/> 정상 <input type="radio"/> 비정상 | <input type="radio"/> 예 <input type="radio"/> 아니오 |

|        |             |      |               |
|--------|-------------|------|---------------|
| C1D8   | PROTOCOL    | SITE | SCREENING NO. |
| 실험실 검사 | PHI-101-002 |      |               |
| 전자서명   |             |      |               |

| 검사항목              | 결과    | 정상 여부                                              | 임상적 유의성                                           |
|-------------------|-------|----------------------------------------------------|---------------------------------------------------|
| Ca                | _____ | <input type="radio"/> 정상 <input type="radio"/> 비정상 | <input type="radio"/> 예 <input type="radio"/> 아니오 |
| Mg                | _____ | <input type="radio"/> 정상 <input type="radio"/> 비정상 | <input type="radio"/> 예 <input type="radio"/> 아니오 |
| Na                | _____ | <input type="radio"/> 정상 <input type="radio"/> 비정상 | <input type="radio"/> 예 <input type="radio"/> 아니오 |
| K                 | _____ | <input type="radio"/> 정상 <input type="radio"/> 비정상 | <input type="radio"/> 예 <input type="radio"/> 아니오 |
| Cl                | _____ | <input type="radio"/> 정상 <input type="radio"/> 비정상 | <input type="radio"/> 예 <input type="radio"/> 아니오 |
| P                 | _____ | <input type="radio"/> 정상 <input type="radio"/> 비정상 | <input type="radio"/> 예 <input type="radio"/> 아니오 |
| Total cholesterol | _____ | <input type="radio"/> 정상 <input type="radio"/> 비정상 | <input type="radio"/> 예 <input type="radio"/> 아니오 |
| Triglyceride      | _____ | <input type="radio"/> 정상 <input type="radio"/> 비정상 | <input type="radio"/> 예 <input type="radio"/> 아니오 |
| CPK               | _____ | <input type="radio"/> 정상 <input type="radio"/> 비정상 | <input type="radio"/> 예 <input type="radio"/> 아니오 |
| Glucose           | _____ | <input type="radio"/> 정상 <input type="radio"/> 비정상 | <input type="radio"/> 예 <input type="radio"/> 아니오 |
| CrCl[자동계산]        | _____ |                                                    |                                                   |

| C1D8              | PROTOCOL    | SITE | SCREENING NO. |
|-------------------|-------------|------|---------------|
| ECHO 또는 MUGA scan | PHI-101-002 |      |               |
| 전자서명              |             |      |               |

| ECHO 또는 MUGA scan                                            |                                                               |
|--------------------------------------------------------------|---------------------------------------------------------------|
| ND                                                           | <input type="checkbox"/> ND                                   |
| 미실시인 경우 사유                                                   | _____<br>_____<br>_____                                       |
| 검사일                                                          | _____                                                         |
| 검사 방법                                                        | <input type="radio"/> ECHO<br><input type="radio"/> MUGA scan |
| 좌심실구출률(LVEF)                                                 | ___ %                                                         |
| 임상적으로 유의한 비정상 소견이 있습니까?                                      | <input type="radio"/> 예<br><input type="radio"/> 아니오          |
| * 동의서 취득 이후 임상적으로 유의한 비정상 소견이 있을 경우, 비정상 소견은 '이상반응'에 기록하십시오. |                                                               |



|       |             |      |               |
|-------|-------------|------|---------------|
| C1D8  | PROTOCOL    | SITE | SCREENING NO. |
| PK 채혈 | PHI-101-002 |      |               |
| 전자서명  |             |      |               |

| PK 채혈        |                             |       |       |
|--------------|-----------------------------|-------|-------|
| ND           | <input type="checkbox"/> ND |       |       |
| 미실시인 경우 사유   | <hr/> <hr/> <hr/>           |       |       |
| PHI-101 투약일  | _____                       |       |       |
| PHI-101 투약시간 | _____                       |       |       |
| 채혈 시점        | ND                          | 채혈일   | 채혈 시간 |
| 투여 전(-30분)   | <input type="checkbox"/>    | _____ | _____ |

|       |             |      |               |
|-------|-------------|------|---------------|
| C1D15 | PROTOCOL    | SITE | SCREENING NO. |
| 방문일   | PHI-101-002 |      |               |
| 전자서명  |             |      |               |

|            |       |
|------------|-------|
| <b>방문일</b> |       |
| 방문일        | _____ |

|                                                                           |
|---------------------------------------------------------------------------|
| <b>선행/병용약물 확인</b>                                                         |
| 지난 방문과 비교하였을 때, 새롭게 투여되었거나 투여 용량이 변경된 병용약물이 있는 경우 선행/병용약물 페이지에 기록하여 주십시오. |

|                                                                                                                     |
|---------------------------------------------------------------------------------------------------------------------|
| <b>이상반응 확인</b>                                                                                                      |
| 지난 방문과 비교하였을 때, 새롭게 발생한 이상반응이 있을 경우 이상반응 페이지에 기록하여 주십시오.<br>(만약, EOT방문 전 새로운 항암요법이 수행되는 경우에는 해당 시점까지만 이상반응을 수집합니다.) |

|            |             |      |               |
|------------|-------------|------|---------------|
| C1D15      | PROTOCOL    | SITE | SCREENING NO. |
| 활력징후, 신체계측 | PHI-101-002 |      |               |
| 전자서명       |             |      |               |

| 활력징후                                                       |                                                      |
|------------------------------------------------------------|------------------------------------------------------|
| ND                                                         | <input type="checkbox"/> ND                          |
| 미실시인 경우 사유                                                 | _____<br>_____<br>_____                              |
| 5분 이상 안정을 취한 후 앉은 자세(좌위)에서 측정합니다.                          |                                                      |
| 측정일                                                        | _____                                                |
| 수축기 혈압                                                     | _ mmHg                                               |
| 이완기 혈압                                                     | _ mmHg                                               |
| 맥박                                                         | _ 회/분                                                |
| 호흡수                                                        | _ 회/분                                                |
| 체온                                                         | _ °C                                                 |
| 임상적으로 유의한 비정상 소견이 있습니까?                                    | <input type="radio"/> 예<br><input type="radio"/> 아니오 |
| 동역서 취득 이후 임상적으로 유의한 비정상 소견이 있을 경우, 비정상 소견은 '이상반응'에 기록하십시오. |                                                      |

|       |             |      |               |
|-------|-------------|------|---------------|
| C1D15 | PROTOCOL    | SITE | SCREENING NO. |
| 신체검진  | PHI-101-002 |      |               |
| 전자서명  |             |      |               |

### 신체검진

|                                                |                                                                                             |
|------------------------------------------------|---------------------------------------------------------------------------------------------|
| ND                                             | <input type="checkbox"/> ND                                                                 |
| 미실시인 경우 사유                                     | _____<br>_____<br>_____                                                                     |
| 검진일                                            | _____                                                                                       |
| 지난 방문과 비교하였을 때, 각 신체기관 검진 결과 새로운 비정상 소견이 있습니까? | <input type="radio"/> 예 → <u>아래 표에 신체기관 및 상세내용을 기재하여 주십시오.</u><br><input type="radio"/> 아니오 |

동의서 취득 이후 임상적으로 유의한 비정상 소견이 있을 경우, 비정상 소견은 '이상반응'에 기록하십시오.

| No | 신체기관 | 임상적 유의성                                           |
|----|------|---------------------------------------------------|
| 1  | —▼   | <input type="radio"/> 예 <input type="radio"/> 아니오 |

|         |                                                            |
|---------|------------------------------------------------------------|
| 신체기관    | 외관, 피부, 두/경부, 흉부/폐, 심장, 복부, 비뇨/생식계, 사지, 근골격계, 신경계, 림프절, 기타 |
| 신체기관_기타 | _____<br>_____<br>_____                                    |

|         |             |      |               |
|---------|-------------|------|---------------|
| C1D15   | PROTOCOL    | SITE | SCREENING NO. |
| ECOG PS | PHI-101-002 |      |               |
| 전자서명    |             |      |               |

| ECOG PS    |                                                                                                                                                                                                    |
|------------|----------------------------------------------------------------------------------------------------------------------------------------------------------------------------------------------------|
| ND         | <input type="checkbox"/> ND                                                                                                                                                                        |
| 미실시인 경우 사유 | <hr/> <hr/> <hr/>                                                                                                                                                                                  |
| 평가일        | _____                                                                                                                                                                                              |
| ECOG PS    | <input type="radio"/> Grade 0<br><input type="radio"/> Grade 1<br><input type="radio"/> Grade 2<br><input type="radio"/> Grade 3<br><input type="radio"/> Grade 4<br><input type="radio"/> Grade 5 |

|        |             |      |               |
|--------|-------------|------|---------------|
| C1D15  | PROTOCOL    | SITE | SCREENING NO. |
| 실험실 검사 | PHI-101-002 |      |               |
| 전자서명   |             |      |               |

| 실험실 검사                                                                                                                                 |                             |
|----------------------------------------------------------------------------------------------------------------------------------------|-----------------------------|
| ND                                                                                                                                     | <input type="checkbox"/> ND |
| 미실시인 경우 사유                                                                                                                             | _____<br>_____<br>_____     |
| 최소 8시간 금식 여부                                                                                                                           | ○ 예<br>○ 아니오                |
| 검체 채취일                                                                                                                                 | _____                       |
| <p>* 동의서 취득 이후 검사 결과가 'Clinical Significance' 일 경우 비정상 소견은 '이상반응'에 기록하십시오.<br/>* 검사 항목별 단위는 "정상 참고 범위"와 함께 제공되므로 아래 결과에 기록하지 않습니다.</p> |                             |

| Hematology  |                             |            |           |
|-------------|-----------------------------|------------|-----------|
| ND          | <input type="checkbox"/> ND |            |           |
| 검사항목        | 결과                          | 정상 여부      | 임상적 유의성   |
| WBC         | _____                       | ○ 정상 ○ 비정상 | ○ 예 ○ 아니오 |
| RBC         | _____                       | ○ 정상 ○ 비정상 | ○ 예 ○ 아니오 |
| Hemoglobin  | _____                       | ○ 정상 ○ 비정상 | ○ 예 ○ 아니오 |
| Hematocrit  | _____                       | ○ 정상 ○ 비정상 | ○ 예 ○ 아니오 |
| Platelet    | _____                       | ○ 정상 ○ 비정상 | ○ 예 ○ 아니오 |
| MCV         | _____                       | ○ 정상 ○ 비정상 | ○ 예 ○ 아니오 |
| MCH         | _____                       | ○ 정상 ○ 비정상 | ○ 예 ○ 아니오 |
| MCHC        | _____                       | ○ 정상 ○ 비정상 | ○ 예 ○ 아니오 |
| Neutrophils | _____                       | ○ 정상 ○ 비정상 | ○ 예 ○ 아니오 |

|        |             |      |               |
|--------|-------------|------|---------------|
| C1D15  | PROTOCOL    | SITE | SCREENING NO. |
| 실험실 검사 | PHI-101-002 |      |               |
| 전자서명   |             |      |               |

| 검사항목        | 결과    | 정상 여부                                              | 임상적 유의성                                           |
|-------------|-------|----------------------------------------------------|---------------------------------------------------|
| Lymphocytes | _____ | <input type="radio"/> 정상 <input type="radio"/> 비정상 | <input type="radio"/> 예 <input type="radio"/> 아니오 |
| Monocytes   | _____ | <input type="radio"/> 정상 <input type="radio"/> 비정상 | <input type="radio"/> 예 <input type="radio"/> 아니오 |
| Eosinophils | _____ | <input type="radio"/> 정상 <input type="radio"/> 비정상 | <input type="radio"/> 예 <input type="radio"/> 아니오 |
| Basophils   | _____ | <input type="radio"/> 정상 <input type="radio"/> 비정상 | <input type="radio"/> 예 <input type="radio"/> 아니오 |
| ANC         | _____ | <input type="radio"/> 정상 <input type="radio"/> 비정상 | <input type="radio"/> 예 <input type="radio"/> 아니오 |

| Chemistry       |                             |                                                    |                                                   |
|-----------------|-----------------------------|----------------------------------------------------|---------------------------------------------------|
| ND              | <input type="checkbox"/> ND |                                                    |                                                   |
| 검사항목            | 결과                          | 정상 여부                                              | 임상적 유의성                                           |
| BUN             | _____                       | <input type="radio"/> 정상 <input type="radio"/> 비정상 | <input type="radio"/> 예 <input type="radio"/> 아니오 |
| Creatinine      | _____                       | <input type="radio"/> 정상 <input type="radio"/> 비정상 | <input type="radio"/> 예 <input type="radio"/> 아니오 |
| Total bilirubin | _____                       | <input type="radio"/> 정상 <input type="radio"/> 비정상 | <input type="radio"/> 예 <input type="radio"/> 아니오 |
| AST             | _____                       | <input type="radio"/> 정상 <input type="radio"/> 비정상 | <input type="radio"/> 예 <input type="radio"/> 아니오 |
| ALT             | _____                       | <input type="radio"/> 정상 <input type="radio"/> 비정상 | <input type="radio"/> 예 <input type="radio"/> 아니오 |
| ALP             | _____                       | <input type="radio"/> 정상 <input type="radio"/> 비정상 | <input type="radio"/> 예 <input type="radio"/> 아니오 |
| γGT             | _____                       | <input type="radio"/> 정상 <input type="radio"/> 비정상 | <input type="radio"/> 예 <input type="radio"/> 아니오 |
| LDH             | _____                       | <input type="radio"/> 정상 <input type="radio"/> 비정상 | <input type="radio"/> 예 <input type="radio"/> 아니오 |
| Total protein   | _____                       | <input type="radio"/> 정상 <input type="radio"/> 비정상 | <input type="radio"/> 예 <input type="radio"/> 아니오 |
| Albumin         | _____                       | <input type="radio"/> 정상 <input type="radio"/> 비정상 | <input type="radio"/> 예 <input type="radio"/> 아니오 |
| Globulin[자동계산]  | _____                       | <input type="radio"/> 정상 <input type="radio"/> 비정상 | <input type="radio"/> 예 <input type="radio"/> 아니오 |

|        |             |      |               |
|--------|-------------|------|---------------|
| C1D15  | PROTOCOL    | SITE | SCREENING NO. |
| 실험실 검사 | PHI-101-002 |      |               |
| 전자서명   |             |      |               |

| 검사항목              | 결과    | 정상 여부                                              | 임상적 유의성                                           |
|-------------------|-------|----------------------------------------------------|---------------------------------------------------|
| Ca                | _____ | <input type="radio"/> 정상 <input type="radio"/> 비정상 | <input type="radio"/> 예 <input type="radio"/> 아니오 |
| Mg                | _____ | <input type="radio"/> 정상 <input type="radio"/> 비정상 | <input type="radio"/> 예 <input type="radio"/> 아니오 |
| Na                | _____ | <input type="radio"/> 정상 <input type="radio"/> 비정상 | <input type="radio"/> 예 <input type="radio"/> 아니오 |
| K                 | _____ | <input type="radio"/> 정상 <input type="radio"/> 비정상 | <input type="radio"/> 예 <input type="radio"/> 아니오 |
| Cl                | _____ | <input type="radio"/> 정상 <input type="radio"/> 비정상 | <input type="radio"/> 예 <input type="radio"/> 아니오 |
| P                 | _____ | <input type="radio"/> 정상 <input type="radio"/> 비정상 | <input type="radio"/> 예 <input type="radio"/> 아니오 |
| Total cholesterol | _____ | <input type="radio"/> 정상 <input type="radio"/> 비정상 | <input type="radio"/> 예 <input type="radio"/> 아니오 |
| Triglyceride      | _____ | <input type="radio"/> 정상 <input type="radio"/> 비정상 | <input type="radio"/> 예 <input type="radio"/> 아니오 |
| CPK               | _____ | <input type="radio"/> 정상 <input type="radio"/> 비정상 | <input type="radio"/> 예 <input type="radio"/> 아니오 |
| Glucose           | _____ | <input type="radio"/> 정상 <input type="radio"/> 비정상 | <input type="radio"/> 예 <input type="radio"/> 아니오 |
| CrCl[자동계산]        | _____ |                                                    |                                                   |



|                   |             |      |               |
|-------------------|-------------|------|---------------|
| C1D15             | PROTOCOL    | SITE | SCREENING NO. |
| ECHO 또는 MUGA scan | PHI-101-002 |      |               |
| 전자서명              |             |      |               |

| ECHO 또는 MUGA scan                                            |                                                               |
|--------------------------------------------------------------|---------------------------------------------------------------|
| ND                                                           | <input type="checkbox"/> ND                                   |
| 미실시인 경우 사유                                                   | _____<br>_____<br>_____                                       |
| 검사일                                                          | _____                                                         |
| 검사 방법                                                        | <input type="radio"/> ECHO<br><input type="radio"/> MUGA scan |
| 좌심실구출률(LVEF)                                                 | ___ %                                                         |
| 임상적으로 유의한 비정상 소견이 있습니까?                                      | <input type="radio"/> 예<br><input type="radio"/> 아니오          |
| * 동의서 취득 이후 임상적으로 유의한 비정상 소견이 있을 경우, 비정상 소견은 '이상반응'에 기록하십시오. |                                                               |

|       |             |      |               |
|-------|-------------|------|---------------|
| C1D15 | PROTOCOL    | SITE | SCREENING NO. |
| PK 채혈 | PHI-101-002 |      |               |
| 전자서명  |             |      |               |

| PK 채혈              |                             |       |       |
|--------------------|-----------------------------|-------|-------|
| ND                 | <input type="checkbox"/> ND |       |       |
| 미실시인 경우 사유         | <hr/> <hr/> <hr/>           |       |       |
| PHI-101 투약일        | _____                       |       |       |
| PHI-101 투약시간       | _____                       |       |       |
| 채혈 시점              | ND                          | 채혈일   | 채혈 시간 |
| 투여 전(-30분)         | <input type="checkbox"/>    | _____ | _____ |
| 투여 후 0.5 시간(±5분)   | <input type="checkbox"/>    | _____ | _____ |
| 투여 후 1 시간(±5분)     | <input type="checkbox"/>    | _____ | _____ |
| 투여 후 2 시간(±0.25시간) | <input type="checkbox"/>    | _____ | _____ |
| 투여 후 4 시간(±0.5시간)  | <input type="checkbox"/>    | _____ | _____ |
| 투여 후 6 시간(±0.5시간)  | <input type="checkbox"/>    | _____ | _____ |
| 투여 후 8 시간(±0.5시간)  | <input type="checkbox"/>    | _____ | _____ |
| 투여 후 24 시간(±1시간)   | <input type="checkbox"/>    | _____ | _____ |

|       |             |      |               |
|-------|-------------|------|---------------|
| C1D22 | PROTOCOL    | SITE | SCREENING NO. |
| 방문일   | PHI-101-002 |      |               |
| 전자서명  |             |      |               |

|            |       |
|------------|-------|
| <b>방문일</b> |       |
| 방문일        | _____ |

|                                                                           |
|---------------------------------------------------------------------------|
| <b>선행/병용약물 확인</b>                                                         |
| 지난 방문과 비교하였을 때, 새롭게 투여되었거나 투여 용량이 변경된 병용약물이 있는 경우 선행/병용약물 페이지에 기록하여 주십시오. |

|                                                                                                                     |
|---------------------------------------------------------------------------------------------------------------------|
| <b>이상반응 확인</b>                                                                                                      |
| 지난 방문과 비교하였을 때, 새롭게 발생한 이상반응이 있을 경우 이상반응 페이지에 기록하여 주십시오.<br>(만약, EOT방문 전 새로운 항암요법이 수행되는 경우에는 해당 시점까지만 이상반응을 수집합니다.) |

|        |             |      |               |
|--------|-------------|------|---------------|
| C1D22  | PROTOCOL    | SITE | SCREENING NO. |
| 실험실 검사 | PHI-101-002 |      |               |
| 전자서명   |             |      |               |

| 실험실 검사                                                                                                                                 |                             |
|----------------------------------------------------------------------------------------------------------------------------------------|-----------------------------|
| ND                                                                                                                                     | <input type="checkbox"/> ND |
| 미실시인 경우 사유                                                                                                                             | _____<br>_____<br>_____     |
| 최소 8시간 금식 여부                                                                                                                           | ○ 예<br>○ 아니오                |
| 검체 채취일                                                                                                                                 | _____                       |
| <p>* 동의서 취득 이후 검사 결과가 'Clinical Significance' 일 경우 비정상 소견은 '이상반응'에 기록하십시오.<br/>* 검사 항목별 단위는 "정상 참고 범위"와 함께 제공되므로 아래 결과에 기록하지 않습니다.</p> |                             |

| Hematology  |                             |            |           |
|-------------|-----------------------------|------------|-----------|
| ND          | <input type="checkbox"/> ND |            |           |
| 검사항목        | 결과                          | 정상 여부      | 임상적 유의성   |
| WBC         | _____                       | ○ 정상 ○ 비정상 | ○ 예 ○ 아니오 |
| RBC         | _____                       | ○ 정상 ○ 비정상 | ○ 예 ○ 아니오 |
| Hemoglobin  | _____                       | ○ 정상 ○ 비정상 | ○ 예 ○ 아니오 |
| Hematocrit  | _____                       | ○ 정상 ○ 비정상 | ○ 예 ○ 아니오 |
| Platelet    | _____                       | ○ 정상 ○ 비정상 | ○ 예 ○ 아니오 |
| MCV         | _____                       | ○ 정상 ○ 비정상 | ○ 예 ○ 아니오 |
| MCH         | _____                       | ○ 정상 ○ 비정상 | ○ 예 ○ 아니오 |
| MCHC        | _____                       | ○ 정상 ○ 비정상 | ○ 예 ○ 아니오 |
| Neutrophils | _____                       | ○ 정상 ○ 비정상 | ○ 예 ○ 아니오 |

|        |             |      |               |
|--------|-------------|------|---------------|
| C1D22  | PROTOCOL    | SITE | SCREENING NO. |
| 실험실 검사 | PHI-101-002 |      |               |
| 전자서명   |             |      |               |

| 검사항목        | 결과    | 정상 여부                                              | 임상적 유의성                                           |
|-------------|-------|----------------------------------------------------|---------------------------------------------------|
| Lymphocytes | _____ | <input type="radio"/> 정상 <input type="radio"/> 비정상 | <input type="radio"/> 예 <input type="radio"/> 아니오 |
| Monocytes   | _____ | <input type="radio"/> 정상 <input type="radio"/> 비정상 | <input type="radio"/> 예 <input type="radio"/> 아니오 |
| Eosinophils | _____ | <input type="radio"/> 정상 <input type="radio"/> 비정상 | <input type="radio"/> 예 <input type="radio"/> 아니오 |
| Basophils   | _____ | <input type="radio"/> 정상 <input type="radio"/> 비정상 | <input type="radio"/> 예 <input type="radio"/> 아니오 |
| ANC         | _____ | <input type="radio"/> 정상 <input type="radio"/> 비정상 | <input type="radio"/> 예 <input type="radio"/> 아니오 |

| Chemistry       |                             |                                                    |                                                   |
|-----------------|-----------------------------|----------------------------------------------------|---------------------------------------------------|
| ND              | <input type="checkbox"/> ND |                                                    |                                                   |
| 검사항목            | 결과                          | 정상 여부                                              | 임상적 유의성                                           |
| BUN             | _____                       | <input type="radio"/> 정상 <input type="radio"/> 비정상 | <input type="radio"/> 예 <input type="radio"/> 아니오 |
| Creatinine      | _____                       | <input type="radio"/> 정상 <input type="radio"/> 비정상 | <input type="radio"/> 예 <input type="radio"/> 아니오 |
| Total bilirubin | _____                       | <input type="radio"/> 정상 <input type="radio"/> 비정상 | <input type="radio"/> 예 <input type="radio"/> 아니오 |
| AST             | _____                       | <input type="radio"/> 정상 <input type="radio"/> 비정상 | <input type="radio"/> 예 <input type="radio"/> 아니오 |
| ALT             | _____                       | <input type="radio"/> 정상 <input type="radio"/> 비정상 | <input type="radio"/> 예 <input type="radio"/> 아니오 |
| ALP             | _____                       | <input type="radio"/> 정상 <input type="radio"/> 비정상 | <input type="radio"/> 예 <input type="radio"/> 아니오 |
| γGT             | _____                       | <input type="radio"/> 정상 <input type="radio"/> 비정상 | <input type="radio"/> 예 <input type="radio"/> 아니오 |
| LDH             | _____                       | <input type="radio"/> 정상 <input type="radio"/> 비정상 | <input type="radio"/> 예 <input type="radio"/> 아니오 |
| Total protein   | _____                       | <input type="radio"/> 정상 <input type="radio"/> 비정상 | <input type="radio"/> 예 <input type="radio"/> 아니오 |
| Albumin         | _____                       | <input type="radio"/> 정상 <input type="radio"/> 비정상 | <input type="radio"/> 예 <input type="radio"/> 아니오 |
| Globulin[자동계산]  | _____                       | <input type="radio"/> 정상 <input type="radio"/> 비정상 | <input type="radio"/> 예 <input type="radio"/> 아니오 |

|        |             |      |               |
|--------|-------------|------|---------------|
| C1D22  | PROTOCOL    | SITE | SCREENING NO. |
| 실험실 검사 | PHI-101-002 |      |               |
| 전자서명   |             |      |               |

| 검사항목              | 결과    | 정상 여부                                              | 임상적 유의성                                           |
|-------------------|-------|----------------------------------------------------|---------------------------------------------------|
| Ca                | _____ | <input type="radio"/> 정상 <input type="radio"/> 비정상 | <input type="radio"/> 예 <input type="radio"/> 아니오 |
| Mg                | _____ | <input type="radio"/> 정상 <input type="radio"/> 비정상 | <input type="radio"/> 예 <input type="radio"/> 아니오 |
| Na                | _____ | <input type="radio"/> 정상 <input type="radio"/> 비정상 | <input type="radio"/> 예 <input type="radio"/> 아니오 |
| K                 | _____ | <input type="radio"/> 정상 <input type="radio"/> 비정상 | <input type="radio"/> 예 <input type="radio"/> 아니오 |
| Cl                | _____ | <input type="radio"/> 정상 <input type="radio"/> 비정상 | <input type="radio"/> 예 <input type="radio"/> 아니오 |
| P                 | _____ | <input type="radio"/> 정상 <input type="radio"/> 비정상 | <input type="radio"/> 예 <input type="radio"/> 아니오 |
| Total cholesterol | _____ | <input type="radio"/> 정상 <input type="radio"/> 비정상 | <input type="radio"/> 예 <input type="radio"/> 아니오 |
| Triglyceride      | _____ | <input type="radio"/> 정상 <input type="radio"/> 비정상 | <input type="radio"/> 예 <input type="radio"/> 아니오 |
| CPK               | _____ | <input type="radio"/> 정상 <input type="radio"/> 비정상 | <input type="radio"/> 예 <input type="radio"/> 아니오 |
| Glucose           | _____ | <input type="radio"/> 정상 <input type="radio"/> 비정상 | <input type="radio"/> 예 <input type="radio"/> 아니오 |
| CrCl[자동계산]        | _____ |                                                    |                                                   |

|                   |             |      |               |
|-------------------|-------------|------|---------------|
| C1D22             | PROTOCOL    | SITE | SCREENING NO. |
| ECHO 또는 MUGA scan | PHI-101-002 |      |               |
| 전자서명              |             |      |               |

| ECHO 또는 MUGA scan                                            |                                                               |
|--------------------------------------------------------------|---------------------------------------------------------------|
| ND                                                           | <input type="checkbox"/> ND                                   |
| 미실시인 경우 사유                                                   | _____<br>_____<br>_____                                       |
| 검사일                                                          | _____                                                         |
| 검사 방법                                                        | <input type="radio"/> ECHO<br><input type="radio"/> MUGA scan |
| 좌심실구출률(LVEF)                                                 | ___ %                                                         |
| 임상적으로 유의한 비정상 소견이 있습니까?                                      | <input type="radio"/> 예<br><input type="radio"/> 아니오          |
| * 동의서 취득 이후 임상적으로 유의한 비정상 소견이 있을 경우, 비정상 소견은 '이상반응'에 기록하십시오. |                                                               |

|       |             |      |               |
|-------|-------------|------|---------------|
| C1D22 | PROTOCOL    | SITE | SCREENING NO. |
| PK 채혈 | PHI-101-002 |      |               |
| 전자서명  |             |      |               |

| PK 채혈        |                             |       |       |
|--------------|-----------------------------|-------|-------|
| ND           | <input type="checkbox"/> ND |       |       |
| 미실시인 경우 사유   | <hr/> <hr/> <hr/>           |       |       |
| PHI-101 투약일  | _____                       |       |       |
| PHI-101 투약시간 | _____                       |       |       |
| 채혈 시점        | ND                          | 채혈일   | 채혈 시간 |
| 투여 전(-30분)   | <input type="checkbox"/>    | _____ | _____ |



|      |             |      |               |
|------|-------------|------|---------------|
| C2D1 | PROTOCOL    | SITE | SCREENING NO. |
| 방문일  | PHI-101-002 |      |               |
| 전자서명 |             |      |               |

|            |       |
|------------|-------|
| <b>방문일</b> |       |
| 방문일        | _____ |

|                                                                           |
|---------------------------------------------------------------------------|
| <b>선행/병용약물 확인</b>                                                         |
| 지난 방문과 비교하였을 때, 새롭게 투여되었거나 투여 용량이 변경된 병용약물이 있는 경우 선행/병용약물 페이지에 기록하여 주십시오. |

|                                                                                                                     |
|---------------------------------------------------------------------------------------------------------------------|
| <b>이상반응 확인</b>                                                                                                      |
| 지난 방문과 비교하였을 때, 새롭게 발생한 이상반응이 있을 경우 이상반응 페이지에 기록하여 주십시오.<br>(만약, EOT방문 전 새로운 항암요법이 수행되는 경우에는 해당 시점까지만 이상반응을 수집합니다.) |

| C2D1       | PROTOCOL    | SITE | SCREENING NO. |
|------------|-------------|------|---------------|
| 활력징후, 신체계측 | PHI-101-002 |      |               |
| 전자서명       |             |      |               |

| 활력징후                                                       |                                                      |
|------------------------------------------------------------|------------------------------------------------------|
| ND                                                         | <input type="checkbox"/> ND                          |
| 미실시인 경우 사유                                                 | _____<br>_____<br>_____                              |
| 5분 이상 안정을 취한 후 앉은 자세(좌위)에서 측정합니다.                          |                                                      |
| 측정일                                                        | _____                                                |
| 수축기 혈압                                                     | _ mmHg                                               |
| 이완기 혈압                                                     | _ mmHg                                               |
| 맥박                                                         | _ 회/분                                                |
| 호흡수                                                        | _ 회/분                                                |
| 체온                                                         | _ °C                                                 |
| 임상적으로 유의한 비정상 소견이 있습니까?                                    | <input type="radio"/> 예<br><input type="radio"/> 아니오 |
| 동역서 취득 이후 임상적으로 유의한 비정상 소견이 있을 경우, 비정상 소견은 '이상반응'에 기록하십시오. |                                                      |

| 신체계측       |                             |
|------------|-----------------------------|
| ND         | <input type="checkbox"/> ND |
| 미실시인 경우 사유 | _____<br>_____<br>_____     |
| 측정일        | _____                       |
| 체중         | _ kg                        |

|      |             |      |               |
|------|-------------|------|---------------|
| C2D1 | PROTOCOL    | SITE | SCREENING NO. |
| 신체검진 | PHI-101-002 |      |               |
| 전자서명 |             |      |               |

### 신체검진

|                                                |                                                                                             |
|------------------------------------------------|---------------------------------------------------------------------------------------------|
| ND                                             | <input type="checkbox"/> ND                                                                 |
| 미실시인 경우 사유                                     | _____<br>_____<br>_____                                                                     |
| 검진일                                            | _____                                                                                       |
| 지난 방문과 비교하였을 때, 각 신체기관 검진 결과 새로운 비정상 소견이 있습니까? | <input type="radio"/> 예 → <u>아래 표에 신체기관 및 상세내용을 기재하여 주십시오.</u><br><input type="radio"/> 아니오 |

동의서 취득 이후 임상적으로 유의한 비정상 소견이 있을 경우, 비정상 소견은 '이상반응'에 기록하십시오.

| No | 신체기관 | 임상적 유의성                                           |
|----|------|---------------------------------------------------|
| 1  | —▼   | <input type="radio"/> 예 <input type="radio"/> 아니오 |

|         |                                                            |
|---------|------------------------------------------------------------|
| 신체기관    | 외관, 피부, 두/경부, 흉부/폐, 심장, 복부, 비뇨/생식계, 사지, 근골격계, 신경계, 림프절, 기타 |
| 신체기관_기타 | _____<br>_____<br>_____                                    |

|         |             |      |               |
|---------|-------------|------|---------------|
| C2D1    | PROTOCOL    | SITE | SCREENING NO. |
| ECOG PS | PHI-101-002 |      |               |
| 전자서명    |             |      |               |

| ECOG PS    |                                                                                                                                                                                                    |
|------------|----------------------------------------------------------------------------------------------------------------------------------------------------------------------------------------------------|
| ND         | <input type="checkbox"/> ND                                                                                                                                                                        |
| 미실시인 경우 사유 | <hr/> <hr/> <hr/>                                                                                                                                                                                  |
| 평가일        | _____                                                                                                                                                                                              |
| ECOG PS    | <input type="radio"/> Grade 0<br><input type="radio"/> Grade 1<br><input type="radio"/> Grade 2<br><input type="radio"/> Grade 3<br><input type="radio"/> Grade 4<br><input type="radio"/> Grade 5 |

|      |             |      |               |
|------|-------------|------|---------------|
| C2D1 | PROTOCOL    | SITE | SCREENING NO. |
| 임신검사 | PHI-101-002 |      |               |
| 전자서명 |             |      |               |

| 임신검사                                 |                                                                    |
|--------------------------------------|--------------------------------------------------------------------|
| ND                                   | <input type="checkbox"/> ND                                        |
| 미실시인 경우 사유                           | _____<br>_____<br>_____                                            |
| 검사일                                  | _____                                                              |
| 검사 방법                                | <input type="radio"/> urine-hCG<br><input type="radio"/> serum-hCG |
| 검사결과                                 | <input type="radio"/> 양성<br><input type="radio"/> 음성               |
| urine-hCG(및/또는 serum hCG) 검사를 실시합니다. |                                                                    |

|        |             |      |               |
|--------|-------------|------|---------------|
| C2D1   | PROTOCOL    | SITE | SCREENING NO. |
| 실험실 검사 | PHI-101-002 |      |               |
| 전자서명   |             |      |               |

| 실험실 검사                                                                                                                                 |                             |
|----------------------------------------------------------------------------------------------------------------------------------------|-----------------------------|
| ND                                                                                                                                     | <input type="checkbox"/> ND |
| 미실시인 경우 사유                                                                                                                             | _____<br>_____<br>_____     |
| 최소 8시간 금식 여부                                                                                                                           | ○ 예<br>○ 아니오                |
| 검체 채취일                                                                                                                                 | _____                       |
| <p>* 동의서 취득 이후 검사 결과가 'Clinical Significance' 일 경우 비정상 소견은 '이상반응'에 기록하십시오.<br/>* 검사 항목별 단위는 "정상 참고 범위"와 함께 제공되므로 아래 결과에 기록하지 않습니다.</p> |                             |

| Hematology  |                             |            |           |
|-------------|-----------------------------|------------|-----------|
| ND          | <input type="checkbox"/> ND |            |           |
| 검사항목        | 결과                          | 정상 여부      | 임상적 유의성   |
| WBC         | _____                       | ○ 정상 ○ 비정상 | ○ 예 ○ 아니오 |
| RBC         | _____                       | ○ 정상 ○ 비정상 | ○ 예 ○ 아니오 |
| Hemoglobin  | _____                       | ○ 정상 ○ 비정상 | ○ 예 ○ 아니오 |
| Hematocrit  | _____                       | ○ 정상 ○ 비정상 | ○ 예 ○ 아니오 |
| Platelet    | _____                       | ○ 정상 ○ 비정상 | ○ 예 ○ 아니오 |
| MCV         | _____                       | ○ 정상 ○ 비정상 | ○ 예 ○ 아니오 |
| MCH         | _____                       | ○ 정상 ○ 비정상 | ○ 예 ○ 아니오 |
| MCHC        | _____                       | ○ 정상 ○ 비정상 | ○ 예 ○ 아니오 |
| Neutrophils | _____                       | ○ 정상 ○ 비정상 | ○ 예 ○ 아니오 |

|        |             |      |               |
|--------|-------------|------|---------------|
| C2D1   | PROTOCOL    | SITE | SCREENING NO. |
| 실험실 검사 | PHI-101-002 |      |               |
| 전자서명   |             |      |               |

| 검사항목        | 결과    | 정상 여부                                              | 임상적 유의성                                           |
|-------------|-------|----------------------------------------------------|---------------------------------------------------|
| Lymphocytes | _____ | <input type="radio"/> 정상 <input type="radio"/> 비정상 | <input type="radio"/> 예 <input type="radio"/> 아니오 |
| Monocytes   | _____ | <input type="radio"/> 정상 <input type="radio"/> 비정상 | <input type="radio"/> 예 <input type="radio"/> 아니오 |
| Eosinophils | _____ | <input type="radio"/> 정상 <input type="radio"/> 비정상 | <input type="radio"/> 예 <input type="radio"/> 아니오 |
| Basophils   | _____ | <input type="radio"/> 정상 <input type="radio"/> 비정상 | <input type="radio"/> 예 <input type="radio"/> 아니오 |
| ANC         | _____ | <input type="radio"/> 정상 <input type="radio"/> 비정상 | <input type="radio"/> 예 <input type="radio"/> 아니오 |

| Chemistry       |                             |                                                    |                                                   |
|-----------------|-----------------------------|----------------------------------------------------|---------------------------------------------------|
| ND              | <input type="checkbox"/> ND |                                                    |                                                   |
| 검사항목            | 결과                          | 정상 여부                                              | 임상적 유의성                                           |
| BUN             | _____                       | <input type="radio"/> 정상 <input type="radio"/> 비정상 | <input type="radio"/> 예 <input type="radio"/> 아니오 |
| Creatinine      | _____                       | <input type="radio"/> 정상 <input type="radio"/> 비정상 | <input type="radio"/> 예 <input type="radio"/> 아니오 |
| Total bilirubin | _____                       | <input type="radio"/> 정상 <input type="radio"/> 비정상 | <input type="radio"/> 예 <input type="radio"/> 아니오 |
| AST             | _____                       | <input type="radio"/> 정상 <input type="radio"/> 비정상 | <input type="radio"/> 예 <input type="radio"/> 아니오 |
| ALT             | _____                       | <input type="radio"/> 정상 <input type="radio"/> 비정상 | <input type="radio"/> 예 <input type="radio"/> 아니오 |
| ALP             | _____                       | <input type="radio"/> 정상 <input type="radio"/> 비정상 | <input type="radio"/> 예 <input type="radio"/> 아니오 |
| γGT             | _____                       | <input type="radio"/> 정상 <input type="radio"/> 비정상 | <input type="radio"/> 예 <input type="radio"/> 아니오 |
| LDH             | _____                       | <input type="radio"/> 정상 <input type="radio"/> 비정상 | <input type="radio"/> 예 <input type="radio"/> 아니오 |
| Total protein   | _____                       | <input type="radio"/> 정상 <input type="radio"/> 비정상 | <input type="radio"/> 예 <input type="radio"/> 아니오 |
| Albumin         | _____                       | <input type="radio"/> 정상 <input type="radio"/> 비정상 | <input type="radio"/> 예 <input type="radio"/> 아니오 |
| Globulin[자동계산]  | _____                       | <input type="radio"/> 정상 <input type="radio"/> 비정상 | <input type="radio"/> 예 <input type="radio"/> 아니오 |

|        |             |      |               |
|--------|-------------|------|---------------|
| C2D1   | PROTOCOL    | SITE | SCREENING NO. |
| 실험실 검사 | PHI-101-002 |      |               |
| 전자서명   |             |      |               |

| 검사항목              | 결과    | 정상 여부                                              | 임상적 유의성                                           |
|-------------------|-------|----------------------------------------------------|---------------------------------------------------|
| Ca                | _____ | <input type="radio"/> 정상 <input type="radio"/> 비정상 | <input type="radio"/> 예 <input type="radio"/> 아니오 |
| Mg                | _____ | <input type="radio"/> 정상 <input type="radio"/> 비정상 | <input type="radio"/> 예 <input type="radio"/> 아니오 |
| Na                | _____ | <input type="radio"/> 정상 <input type="radio"/> 비정상 | <input type="radio"/> 예 <input type="radio"/> 아니오 |
| K                 | _____ | <input type="radio"/> 정상 <input type="radio"/> 비정상 | <input type="radio"/> 예 <input type="radio"/> 아니오 |
| Cl                | _____ | <input type="radio"/> 정상 <input type="radio"/> 비정상 | <input type="radio"/> 예 <input type="radio"/> 아니오 |
| P                 | _____ | <input type="radio"/> 정상 <input type="radio"/> 비정상 | <input type="radio"/> 예 <input type="radio"/> 아니오 |
| Total cholesterol | _____ | <input type="radio"/> 정상 <input type="radio"/> 비정상 | <input type="radio"/> 예 <input type="radio"/> 아니오 |
| Triglyceride      | _____ | <input type="radio"/> 정상 <input type="radio"/> 비정상 | <input type="radio"/> 예 <input type="radio"/> 아니오 |
| CPK               | _____ | <input type="radio"/> 정상 <input type="radio"/> 비정상 | <input type="radio"/> 예 <input type="radio"/> 아니오 |
| Glucose           | _____ | <input type="radio"/> 정상 <input type="radio"/> 비정상 | <input type="radio"/> 예 <input type="radio"/> 아니오 |
| CrCl[자동계산]        | _____ |                                                    |                                                   |

| Urinalysis       |                             |                                                    |                                                   |
|------------------|-----------------------------|----------------------------------------------------|---------------------------------------------------|
| ND               | <input type="checkbox"/> ND |                                                    |                                                   |
| 검사항목             | 결과                          | 정상 여부                                              | 임상적 유의성                                           |
| Specific gravity | _____                       | <input type="radio"/> 정상 <input type="radio"/> 비정상 | <input type="radio"/> 예 <input type="radio"/> 아니오 |
| pH               | _____                       | <input type="radio"/> 정상 <input type="radio"/> 비정상 | <input type="radio"/> 예 <input type="radio"/> 아니오 |
| Bilirubin[U]     | _____                       | <input type="radio"/> 정상 <input type="radio"/> 비정상 | <input type="radio"/> 예 <input type="radio"/> 아니오 |
| Urobilinogen[U]  | _____                       | <input type="radio"/> 정상 <input type="radio"/> 비정상 | <input type="radio"/> 예 <input type="radio"/> 아니오 |
| Blood[U]         | _____                       | <input type="radio"/> 정상 <input type="radio"/> 비정상 | <input type="radio"/> 예 <input type="radio"/> 아니오 |



|        |             |      |               |
|--------|-------------|------|---------------|
| C2D1   | PROTOCOL    | SITE | SCREENING NO. |
| 실험실 검사 | PHI-101-002 |      |               |
| 전자서명   |             |      |               |

| 검사항목                | 결과    | 정상 여부                                              | 임상적 유의성                                           |
|---------------------|-------|----------------------------------------------------|---------------------------------------------------|
| Glucose[U]          | _____ | <input type="radio"/> 정상 <input type="radio"/> 비정상 | <input type="radio"/> 예 <input type="radio"/> 아니오 |
| Protein[U] (Alb[U]) | _____ | <input type="radio"/> 정상 <input type="radio"/> 비정상 | <input type="radio"/> 예 <input type="radio"/> 아니오 |
| Ketones[U]          | _____ | <input type="radio"/> 정상 <input type="radio"/> 비정상 | <input type="radio"/> 예 <input type="radio"/> 아니오 |
| Leukocytes[U]       | _____ | <input type="radio"/> 정상 <input type="radio"/> 비정상 | <input type="radio"/> 예 <input type="radio"/> 아니오 |

|             |             |      |               |
|-------------|-------------|------|---------------|
| C2D1        | PROTOCOL    | SITE | SCREENING NO. |
| 12-Lead ECG | PHI-101-002 |      |               |
| 전자서명        |             |      |               |

| 12-Lead ECG                                                                                                                                                                                                                                      |            |                                                      |              |             |              |              |
|--------------------------------------------------------------------------------------------------------------------------------------------------------------------------------------------------------------------------------------------------|------------|------------------------------------------------------|--------------|-------------|--------------|--------------|
| ND                                                                                                                                                                                                                                               |            | <input type="checkbox"/> ND                          |              |             |              |              |
| 미실시인 경우 사유                                                                                                                                                                                                                                       |            | _____                                                |              |             |              |              |
| 검사일                                                                                                                                                                                                                                              |            | _____                                                |              |             |              |              |
| 측정횟수                                                                                                                                                                                                                                             |            | <input type="radio"/> 1회<br><input type="radio"/> 3회 |              |             |              |              |
| BBB 여부                                                                                                                                                                                                                                           |            | <input type="radio"/> 예<br><input type="radio"/> 아니오 |              |             |              |              |
| No.                                                                                                                                                                                                                                              | Heart Rate | PR Interval                                          | QRS Duration | QT Interval | QTcB [자동 계산] | QTcF [자동 계산] |
| 1차                                                                                                                                                                                                                                               | __ bpm     | __ msec                                              | __ msec      | __ msec     | __           | __           |
| 2차                                                                                                                                                                                                                                               | __ bpm     | __ msec                                              | __ msec      | __ msec     | __           | __           |
| 3차                                                                                                                                                                                                                                               | __ bpm     | __ msec                                              | __ msec      | __ msec     | __           | __           |
| QTcB 평균[자동계산]                                                                                                                                                                                                                                    |            | __                                                   |              |             |              |              |
| QTcF 평균[자동계산]                                                                                                                                                                                                                                    |            | __                                                   |              |             |              |              |
| 임상적으로 유의한 비정상 소견이 있습니까?                                                                                                                                                                                                                          |            | <input type="radio"/> 예<br><input type="radio"/> 아니오 |              |             |              |              |
| <p>* 동의서 취득 이후 임상적으로 유의한 비정상 소견이 있을 경우, 비정상 소견은 '이상반응'에 기록하십시오.<br/>           * Screen, C1D1 시점에서는 3회 측정하고, 이후 주기에서는 1회만 수행합니다.<br/>           (단, ECG를 통해 QT 간격 연장이 입증된 경우, 단기간(즉시)에 추가로 2개의 ECG를 수행하여 최종 3개 ECG의 평균 QTc interval을 확인합니다.)</p> |            |                                                      |              |             |              |              |

| C2D1              | PROTOCOL    | SITE | SCREENING NO. |
|-------------------|-------------|------|---------------|
| ECHO 또는 MUGA scan | PHI-101-002 |      |               |
| 전자서명              |             |      |               |

| ECHO 또는 MUGA scan                                            |                                                               |
|--------------------------------------------------------------|---------------------------------------------------------------|
| ND                                                           | <input type="checkbox"/> ND                                   |
| 미실시인 경우 사유                                                   | _____<br>_____<br>_____                                       |
| 검사일                                                          | _____                                                         |
| 검사 방법                                                        | <input type="radio"/> ECHO<br><input type="radio"/> MUGA scan |
| 좌심실구출률(LVEF)                                                 | ___ %                                                         |
| 임상적으로 유의한 비정상 소견이 있습니까?                                      | <input type="radio"/> 예<br><input type="radio"/> 아니오          |
| * 동의서 취득 이후 임상적으로 유의한 비정상 소견이 있을 경우, 비정상 소견은 '이상반응'에 기록하십시오. |                                                               |

|       |             |      |               |
|-------|-------------|------|---------------|
| C2D1  | PROTOCOL    | SITE | SCREENING NO. |
| PK 채혈 | PHI-101-002 |      |               |
| 전자서명  |             |      |               |

| PK 채혈        |                             |       |       |
|--------------|-----------------------------|-------|-------|
| ND           | <input type="checkbox"/> ND |       |       |
| 미실시인 경우 사유   | <hr/> <hr/> <hr/>           |       |       |
| PHI-101 투약일  | _____                       |       |       |
| PHI-101 투약시간 | _____                       |       |       |
| 채혈 시점        | ND                          | 채혈일   | 채혈 시간 |
| 투여 전(-30분)   | <input type="checkbox"/>    | _____ | _____ |
| 투여 후 2~4시간   | <input type="checkbox"/>    | _____ | _____ |

|       |             |      |               |
|-------|-------------|------|---------------|
| C2D15 | PROTOCOL    | SITE | SCREENING NO. |
| 방문일   | PHI-101-002 |      |               |
| 전자서명  |             |      |               |

|            |       |
|------------|-------|
| <b>방문일</b> |       |
| 방문일        | _____ |

|                                                                           |
|---------------------------------------------------------------------------|
| <b>선행/병용약물 확인</b>                                                         |
| 지난 방문과 비교하였을 때, 새롭게 투여되었거나 투여 용량이 변경된 병용약물이 있는 경우 선행/병용약물 페이지에 기록하여 주십시오. |

|                                                                                                                     |
|---------------------------------------------------------------------------------------------------------------------|
| <b>이상반응 확인</b>                                                                                                      |
| 지난 방문과 비교하였을 때, 새롭게 발생한 이상반응이 있을 경우 이상반응 페이지에 기록하여 주십시오.<br>(만약, EOT방문 전 새로운 항암요법이 수행되는 경우에는 해당 시점까지만 이상반응을 수집합니다.) |

|            |             |      |               |
|------------|-------------|------|---------------|
| C2D15      | PROTOCOL    | SITE | SCREENING NO. |
| 활력징후, 신체계측 | PHI-101-002 |      |               |
| 전자서명       |             |      |               |

| 활력징후                                                       |                                                      |
|------------------------------------------------------------|------------------------------------------------------|
| ND                                                         | <input type="checkbox"/> ND                          |
| 미실시인 경우 사유                                                 | _____<br>_____<br>_____                              |
| 5분 이상 안정을 취한 후 앉은 자세(좌위)에서 측정합니다.                          |                                                      |
| 측정일                                                        | _____                                                |
| 수축기 혈압                                                     | _ mmHg                                               |
| 이완기 혈압                                                     | _ mmHg                                               |
| 맥박                                                         | _ 회/분                                                |
| 호흡수                                                        | _ 회/분                                                |
| 체온                                                         | _ °C                                                 |
| 임상적으로 유의한 비정상 소견이 있습니까?                                    | <input type="radio"/> 예<br><input type="radio"/> 아니오 |
| 동역서 취득 이후 임상적으로 유의한 비정상 소견이 있을 경우, 비정상 소견은 '이상반응'에 기록하십시오. |                                                      |

|       |             |      |               |
|-------|-------------|------|---------------|
| C2D15 | PROTOCOL    | SITE | SCREENING NO. |
| 신체검진  | PHI-101-002 |      |               |
| 전자서명  |             |      |               |

**신체검진**

|                                                |                                                                                             |
|------------------------------------------------|---------------------------------------------------------------------------------------------|
| ND                                             | <input type="checkbox"/> ND                                                                 |
| 미실시인 경우 사유                                     | _____<br>_____<br>_____                                                                     |
| 검진일                                            | _____                                                                                       |
| 지난 방문과 비교하였을 때, 각 신체기관 검진 결과 새로운 비정상 소견이 있습니까? | <input type="radio"/> 예 → <u>아래 표에 신체기관 및 상세내용을 기재하여 주십시오.</u><br><input type="radio"/> 아니오 |

동의를 취득 이후 임상적으로 유의한 비정상 소견이 있을 경우, 비정상 소견은 '이상반응'에 기록하십시오.

| No | 신체기관 | 임상적 유의성                                           |
|----|------|---------------------------------------------------|
| 1  | —▼   | <input type="radio"/> 예 <input type="radio"/> 아니오 |

|         |                                                            |
|---------|------------------------------------------------------------|
| 신체기관    | 외관, 피부, 두/경부, 흉부/폐, 심장, 복부, 비뇨/생식계, 사지, 근골격계, 신경계, 림프절, 기타 |
| 신체기관_기타 | _____<br>_____<br>_____                                    |

|         |             |      |               |
|---------|-------------|------|---------------|
| C2D15   | PROTOCOL    | SITE | SCREENING NO. |
| ECOG PS | PHI-101-002 |      |               |
| 전자서명    |             |      |               |

| ECOG PS    |                                                                                                                                                                                                    |
|------------|----------------------------------------------------------------------------------------------------------------------------------------------------------------------------------------------------|
| ND         | <input type="checkbox"/> ND                                                                                                                                                                        |
| 미실시인 경우 사유 | _____<br>_____<br>_____                                                                                                                                                                            |
| 평가일        | _____                                                                                                                                                                                              |
| ECOG PS    | <input type="radio"/> Grade 0<br><input type="radio"/> Grade 1<br><input type="radio"/> Grade 2<br><input type="radio"/> Grade 3<br><input type="radio"/> Grade 4<br><input type="radio"/> Grade 5 |



|        |             |      |               |
|--------|-------------|------|---------------|
| C2D15  | PROTOCOL    | SITE | SCREENING NO. |
| 실험실 검사 | PHI-101-002 |      |               |
| 전자서명   |             |      |               |

| 실험실 검사                                                                                                                                 |                             |
|----------------------------------------------------------------------------------------------------------------------------------------|-----------------------------|
| ND                                                                                                                                     | <input type="checkbox"/> ND |
| 미실시인 경우 사유                                                                                                                             | _____<br>_____<br>_____     |
| 최소 8시간 금식 여부                                                                                                                           | ○ 예<br>○ 아니오                |
| 검체 채취일                                                                                                                                 | _____                       |
| <p>* 동의서 취득 이후 검사 결과가 'Clinical Significance' 일 경우 비정상 소견은 '이상반응'에 기록하십시오.<br/>* 검사 항목별 단위는 "정상 참고 범위"와 함께 제공되므로 아래 결과에 기록하지 않습니다.</p> |                             |

| Hematology  |                             |            |           |
|-------------|-----------------------------|------------|-----------|
| ND          | <input type="checkbox"/> ND |            |           |
| 검사항목        | 결과                          | 정상 여부      | 임상적 유의성   |
| WBC         | _____                       | ○ 정상 ○ 비정상 | ○ 예 ○ 아니오 |
| RBC         | _____                       | ○ 정상 ○ 비정상 | ○ 예 ○ 아니오 |
| Hemoglobin  | _____                       | ○ 정상 ○ 비정상 | ○ 예 ○ 아니오 |
| Hematocrit  | _____                       | ○ 정상 ○ 비정상 | ○ 예 ○ 아니오 |
| Platelet    | _____                       | ○ 정상 ○ 비정상 | ○ 예 ○ 아니오 |
| MCV         | _____                       | ○ 정상 ○ 비정상 | ○ 예 ○ 아니오 |
| MCH         | _____                       | ○ 정상 ○ 비정상 | ○ 예 ○ 아니오 |
| MCHC        | _____                       | ○ 정상 ○ 비정상 | ○ 예 ○ 아니오 |
| Neutrophils | _____                       | ○ 정상 ○ 비정상 | ○ 예 ○ 아니오 |

|        |             |      |               |
|--------|-------------|------|---------------|
| C2D15  | PROTOCOL    | SITE | SCREENING NO. |
| 실험실 검사 | PHI-101-002 |      |               |
| 전자서명   |             |      |               |

| 검사항목        | 결과    | 정상 여부                                              | 임상적 유의성                                           |
|-------------|-------|----------------------------------------------------|---------------------------------------------------|
| Lymphocytes | _____ | <input type="radio"/> 정상 <input type="radio"/> 비정상 | <input type="radio"/> 예 <input type="radio"/> 아니오 |
| Monocytes   | _____ | <input type="radio"/> 정상 <input type="radio"/> 비정상 | <input type="radio"/> 예 <input type="radio"/> 아니오 |
| Eosinophils | _____ | <input type="radio"/> 정상 <input type="radio"/> 비정상 | <input type="radio"/> 예 <input type="radio"/> 아니오 |
| Basophils   | _____ | <input type="radio"/> 정상 <input type="radio"/> 비정상 | <input type="radio"/> 예 <input type="radio"/> 아니오 |
| ANC         | _____ | <input type="radio"/> 정상 <input type="radio"/> 비정상 | <input type="radio"/> 예 <input type="radio"/> 아니오 |

| Chemistry       |                             |                                                    |                                                   |
|-----------------|-----------------------------|----------------------------------------------------|---------------------------------------------------|
| ND              | <input type="checkbox"/> ND |                                                    |                                                   |
| 검사항목            | 결과                          | 정상 여부                                              | 임상적 유의성                                           |
| BUN             | _____                       | <input type="radio"/> 정상 <input type="radio"/> 비정상 | <input type="radio"/> 예 <input type="radio"/> 아니오 |
| Creatinine      | _____                       | <input type="radio"/> 정상 <input type="radio"/> 비정상 | <input type="radio"/> 예 <input type="radio"/> 아니오 |
| Total bilirubin | _____                       | <input type="radio"/> 정상 <input type="radio"/> 비정상 | <input type="radio"/> 예 <input type="radio"/> 아니오 |
| AST             | _____                       | <input type="radio"/> 정상 <input type="radio"/> 비정상 | <input type="radio"/> 예 <input type="radio"/> 아니오 |
| ALT             | _____                       | <input type="radio"/> 정상 <input type="radio"/> 비정상 | <input type="radio"/> 예 <input type="radio"/> 아니오 |
| ALP             | _____                       | <input type="radio"/> 정상 <input type="radio"/> 비정상 | <input type="radio"/> 예 <input type="radio"/> 아니오 |
| γGT             | _____                       | <input type="radio"/> 정상 <input type="radio"/> 비정상 | <input type="radio"/> 예 <input type="radio"/> 아니오 |
| LDH             | _____                       | <input type="radio"/> 정상 <input type="radio"/> 비정상 | <input type="radio"/> 예 <input type="radio"/> 아니오 |
| Total protein   | _____                       | <input type="radio"/> 정상 <input type="radio"/> 비정상 | <input type="radio"/> 예 <input type="radio"/> 아니오 |
| Albumin         | _____                       | <input type="radio"/> 정상 <input type="radio"/> 비정상 | <input type="radio"/> 예 <input type="radio"/> 아니오 |
| Globulin[자동계산]  | _____                       | <input type="radio"/> 정상 <input type="radio"/> 비정상 | <input type="radio"/> 예 <input type="radio"/> 아니오 |

|        |             |      |               |
|--------|-------------|------|---------------|
| C2D15  | PROTOCOL    | SITE | SCREENING NO. |
| 실험실 검사 | PHI-101-002 |      |               |
| 전자서명   |             |      |               |

| 검사항목              | 결과    | 정상 여부                                              | 임상적 유의성                                           |
|-------------------|-------|----------------------------------------------------|---------------------------------------------------|
| Ca                | _____ | <input type="radio"/> 정상 <input type="radio"/> 비정상 | <input type="radio"/> 예 <input type="radio"/> 아니오 |
| Mg                | _____ | <input type="radio"/> 정상 <input type="radio"/> 비정상 | <input type="radio"/> 예 <input type="radio"/> 아니오 |
| Na                | _____ | <input type="radio"/> 정상 <input type="radio"/> 비정상 | <input type="radio"/> 예 <input type="radio"/> 아니오 |
| K                 | _____ | <input type="radio"/> 정상 <input type="radio"/> 비정상 | <input type="radio"/> 예 <input type="radio"/> 아니오 |
| Cl                | _____ | <input type="radio"/> 정상 <input type="radio"/> 비정상 | <input type="radio"/> 예 <input type="radio"/> 아니오 |
| P                 | _____ | <input type="radio"/> 정상 <input type="radio"/> 비정상 | <input type="radio"/> 예 <input type="radio"/> 아니오 |
| Total cholesterol | _____ | <input type="radio"/> 정상 <input type="radio"/> 비정상 | <input type="radio"/> 예 <input type="radio"/> 아니오 |
| Triglyceride      | _____ | <input type="radio"/> 정상 <input type="radio"/> 비정상 | <input type="radio"/> 예 <input type="radio"/> 아니오 |
| CPK               | _____ | <input type="radio"/> 정상 <input type="radio"/> 비정상 | <input type="radio"/> 예 <input type="radio"/> 아니오 |
| Glucose           | _____ | <input type="radio"/> 정상 <input type="radio"/> 비정상 | <input type="radio"/> 예 <input type="radio"/> 아니오 |
| CrCl[자동계산]        | _____ |                                                    |                                                   |

|             |             |      |               |
|-------------|-------------|------|---------------|
| C2D15       | PROTOCOL    | SITE | SCREENING NO. |
| 12-Lead ECG | PHI-101-002 |      |               |
| 전자서명        |             |      |               |

| 12-Lead ECG                                                                                                                                                                                                                                      |            |                                                      |              |             |             |             |
|--------------------------------------------------------------------------------------------------------------------------------------------------------------------------------------------------------------------------------------------------|------------|------------------------------------------------------|--------------|-------------|-------------|-------------|
| ND                                                                                                                                                                                                                                               |            | <input type="checkbox"/> ND                          |              |             |             |             |
| 미실시인 경우 사유                                                                                                                                                                                                                                       |            | _____                                                |              |             |             |             |
| 검사일                                                                                                                                                                                                                                              |            | _____                                                |              |             |             |             |
| 측정횟수                                                                                                                                                                                                                                             |            | <input type="radio"/> 1회<br><input type="radio"/> 3회 |              |             |             |             |
| BBB 여부                                                                                                                                                                                                                                           |            | <input type="radio"/> 예<br><input type="radio"/> 아니오 |              |             |             |             |
| No.                                                                                                                                                                                                                                              | Heart Rate | PR Interval                                          | QRS Duration | QT Interval | QTcB [자동계산] | QTcF [자동계산] |
| 1차                                                                                                                                                                                                                                               | __ bpm     | __ msec                                              | __ msec      | __ msec     | __          | __          |
| 2차                                                                                                                                                                                                                                               | __ bpm     | __ msec                                              | __ msec      | __ msec     | __          | __          |
| 3차                                                                                                                                                                                                                                               | __ bpm     | __ msec                                              | __ msec      | __ msec     | __          | __          |
| QTcB 평균[자동계산]                                                                                                                                                                                                                                    |            | __                                                   |              |             |             |             |
| QTcF 평균[자동계산]                                                                                                                                                                                                                                    |            | __                                                   |              |             |             |             |
| 임상적으로 유의한 비정상 소견이 있습니까?                                                                                                                                                                                                                          |            | <input type="radio"/> 예<br><input type="radio"/> 아니오 |              |             |             |             |
| <p>* 동의서 취득 이후 임상적으로 유의한 비정상 소견이 있을 경우, 비정상 소견은 '이상반응'에 기록하십시오.<br/>           * Screen, C1D1 시점에서는 3회 측정하고, 이후 주기에서는 1회만 수행합니다.<br/>           (단, ECG를 통해 QT 간격 연장이 입증된 경우, 단기간(즉시)에 추가로 2개의 ECG를 수행하여 최종 3개 ECG의 평균 QTc interval을 확인합니다.)</p> |            |                                                      |              |             |             |             |

|                   |             |      |               |
|-------------------|-------------|------|---------------|
| C2D15             | PROTOCOL    | SITE | SCREENING NO. |
| ECHO 또는 MUGA scan | PHI-101-002 |      |               |
| 전자서명              |             |      |               |

| ECHO 또는 MUGA scan                                            |                                                               |
|--------------------------------------------------------------|---------------------------------------------------------------|
| ND                                                           | <input type="checkbox"/> ND                                   |
| 미실시인 경우 사유                                                   | _____<br>_____<br>_____                                       |
| 검사일                                                          | _____                                                         |
| 검사 방법                                                        | <input type="radio"/> ECHO<br><input type="radio"/> MUGA scan |
| 좌심실구출률(LVEF)                                                 | ___ %                                                         |
| 임상적으로 유의한 비정상 소견이 있습니까?                                      | <input type="radio"/> 예<br><input type="radio"/> 아니오          |
| * 동의서 취득 이후 임상적으로 유의한 비정상 소견이 있을 경우, 비정상 소견은 '이상반응'에 기록하십시오. |                                                               |

|      |             |      |               |
|------|-------------|------|---------------|
| C3D1 | PROTOCOL    | SITE | SCREENING NO. |
| 방문일  | PHI-101-002 |      |               |
| 전자서명 |             |      |               |

|            |       |
|------------|-------|
| <b>방문일</b> |       |
| 방문일        | _____ |

|                                                                           |
|---------------------------------------------------------------------------|
| <b>선행/병용약물 확인</b>                                                         |
| 지난 방문과 비교하였을 때, 새롭게 투여되었거나 투여 용량이 변경된 병용약물이 있는 경우 선행/병용약물 페이지에 기록하여 주십시오. |

|                                                                                                                     |
|---------------------------------------------------------------------------------------------------------------------|
| <b>이상반응 확인</b>                                                                                                      |
| 지난 방문과 비교하였을 때, 새롭게 발생한 이상반응이 있을 경우 이상반응 페이지에 기록하여 주십시오.<br>(만약, EOT방문 전 새로운 항암요법이 수행되는 경우에는 해당 시점까지만 이상반응을 수집합니다.) |

| C3D1       | PROTOCOL    | SITE | SCREENING NO. |
|------------|-------------|------|---------------|
| 활력징후, 신체계측 | PHI-101-002 |      |               |
| 전자서명       |             |      |               |

| 활력징후                                                       |                                                      |
|------------------------------------------------------------|------------------------------------------------------|
| ND                                                         | <input type="checkbox"/> ND                          |
| 미실시인 경우 사유                                                 | _____<br>_____<br>_____                              |
| 5분 이상 안정을 취한 후 앉은 자세(좌위)에서 측정합니다.                          |                                                      |
| 측정일                                                        | _____                                                |
| 수축기 혈압                                                     | _ mmHg                                               |
| 이완기 혈압                                                     | _ mmHg                                               |
| 맥박                                                         | _ 회/분                                                |
| 호흡수                                                        | _ 회/분                                                |
| 체온                                                         | _ °C                                                 |
| 임상적으로 유의한 비정상 소견이 있습니까?                                    | <input type="radio"/> 예<br><input type="radio"/> 아니오 |
| 동역서 취득 이후 임상적으로 유의한 비정상 소견이 있을 경우, 비정상 소견은 '이상반응'에 기록하십시오. |                                                      |

| 신체계측       |                             |
|------------|-----------------------------|
| ND         | <input type="checkbox"/> ND |
| 미실시인 경우 사유 | _____<br>_____<br>_____     |
| 측정일        | _____                       |
| 체중         | _ kg                        |

|      |             |      |               |
|------|-------------|------|---------------|
| C3D1 | PROTOCOL    | SITE | SCREENING NO. |
| 신체검진 | PHI-101-002 |      |               |
| 전자서명 |             |      |               |

### 신체검진

|                                                |                                                                                             |
|------------------------------------------------|---------------------------------------------------------------------------------------------|
| ND                                             | <input type="checkbox"/> ND                                                                 |
| 미실시인 경우 사유                                     | _____<br>_____<br>_____                                                                     |
| 검진일                                            | _____                                                                                       |
| 지난 방문과 비교하였을 때, 각 신체기관 검진 결과 새로운 비정상 소견이 있습니까? | <input type="radio"/> 예 → <u>아래 표에 신체기관 및 상세내용을 기재하여 주십시오.</u><br><input type="radio"/> 아니오 |

동의서 취득 이후 임상적으로 유의한 비정상 소견이 있을 경우, 비정상 소견은 '이상반응'에 기록하십시오.

| No | 신체기관 | 임상적 유의성                                           |
|----|------|---------------------------------------------------|
| 1  | —▼   | <input type="radio"/> 예 <input type="radio"/> 아니오 |

|         |                                                            |
|---------|------------------------------------------------------------|
| 신체기관    | 외관, 피부, 두/경부, 흉부/폐, 심장, 복부, 비뇨/생식계, 사지, 근골격계, 신경계, 림프절, 기타 |
| 신체기관_기타 | _____<br>_____<br>_____                                    |



|         |             |      |               |
|---------|-------------|------|---------------|
| C3D1    | PROTOCOL    | SITE | SCREENING NO. |
| ECOG PS | PHI-101-002 |      |               |
| 전자서명    |             |      |               |

| ECOG PS    |                                                                                                                                                                                                    |
|------------|----------------------------------------------------------------------------------------------------------------------------------------------------------------------------------------------------|
| ND         | <input type="checkbox"/> ND                                                                                                                                                                        |
| 미실시인 경우 사유 | _____<br>_____<br>_____                                                                                                                                                                            |
| 평가일        | _____                                                                                                                                                                                              |
| ECOG PS    | <input type="radio"/> Grade 0<br><input type="radio"/> Grade 1<br><input type="radio"/> Grade 2<br><input type="radio"/> Grade 3<br><input type="radio"/> Grade 4<br><input type="radio"/> Grade 5 |

|      |             |      |               |
|------|-------------|------|---------------|
| C3D1 | PROTOCOL    | SITE | SCREENING NO. |
| 임신검사 | PHI-101-002 |      |               |
| 전자서명 |             |      |               |

| 임신검사                                 |                                                                    |
|--------------------------------------|--------------------------------------------------------------------|
| ND                                   | <input type="checkbox"/> ND                                        |
| 미실시인 경우 사유                           | _____<br>_____<br>_____                                            |
| 검사일                                  | _____                                                              |
| 검사 방법                                | <input type="radio"/> urine-hCG<br><input type="radio"/> serum-hCG |
| 검사결과                                 | <input type="radio"/> 양성<br><input type="radio"/> 음성               |
| urine-hCG(및/또는 serum hCG) 검사를 실시합니다. |                                                                    |

|        |             |      |               |
|--------|-------------|------|---------------|
| C3D1   | PROTOCOL    | SITE | SCREENING NO. |
| 실험실 검사 | PHI-101-002 |      |               |
| 전자서명   |             |      |               |

| 실험실 검사                                                                                                                                 |                                                      |
|----------------------------------------------------------------------------------------------------------------------------------------|------------------------------------------------------|
| ND                                                                                                                                     | <input type="checkbox"/> ND                          |
| 미실시인 경우 사유                                                                                                                             | _____<br>_____<br>_____                              |
| 최소 8시간 금식 여부                                                                                                                           | <input type="radio"/> 예<br><input type="radio"/> 아니오 |
| 검체 채취일                                                                                                                                 | _____                                                |
| <p>* 동의서 취득 이후 검사 결과가 'Clinical Significance' 일 경우 비정상 소견은 '이상반응'에 기록하십시오.<br/>* 검사 항목별 단위는 "정상 참고 범위"와 함께 제공되므로 아래 결과에 기록하지 않습니다.</p> |                                                      |

| Hematology  |                             |                                                    |                                                   |
|-------------|-----------------------------|----------------------------------------------------|---------------------------------------------------|
| ND          | <input type="checkbox"/> ND |                                                    |                                                   |
| 검사항목        | 결과                          | 정상 여부                                              | 임상적 유의성                                           |
| WBC         | _____                       | <input type="radio"/> 정상 <input type="radio"/> 비정상 | <input type="radio"/> 예 <input type="radio"/> 아니오 |
| RBC         | _____                       | <input type="radio"/> 정상 <input type="radio"/> 비정상 | <input type="radio"/> 예 <input type="radio"/> 아니오 |
| Hemoglobin  | _____                       | <input type="radio"/> 정상 <input type="radio"/> 비정상 | <input type="radio"/> 예 <input type="radio"/> 아니오 |
| Hematocrit  | _____                       | <input type="radio"/> 정상 <input type="radio"/> 비정상 | <input type="radio"/> 예 <input type="radio"/> 아니오 |
| Platelet    | _____                       | <input type="radio"/> 정상 <input type="radio"/> 비정상 | <input type="radio"/> 예 <input type="radio"/> 아니오 |
| MCV         | _____                       | <input type="radio"/> 정상 <input type="radio"/> 비정상 | <input type="radio"/> 예 <input type="radio"/> 아니오 |
| MCH         | _____                       | <input type="radio"/> 정상 <input type="radio"/> 비정상 | <input type="radio"/> 예 <input type="radio"/> 아니오 |
| MCHC        | _____                       | <input type="radio"/> 정상 <input type="radio"/> 비정상 | <input type="radio"/> 예 <input type="radio"/> 아니오 |
| Neutrophils | _____                       | <input type="radio"/> 정상 <input type="radio"/> 비정상 | <input type="radio"/> 예 <input type="radio"/> 아니오 |

|        |             |      |               |
|--------|-------------|------|---------------|
| C3D1   | PROTOCOL    | SITE | SCREENING NO. |
| 실험실 검사 | PHI-101-002 |      |               |
| 전자서명   |             |      |               |

| 검사항목        | 결과    | 정상 여부                                              | 임상적 유의성                                           |
|-------------|-------|----------------------------------------------------|---------------------------------------------------|
| Lymphocytes | _____ | <input type="radio"/> 정상 <input type="radio"/> 비정상 | <input type="radio"/> 예 <input type="radio"/> 아니오 |
| Monocytes   | _____ | <input type="radio"/> 정상 <input type="radio"/> 비정상 | <input type="radio"/> 예 <input type="radio"/> 아니오 |
| Eosinophils | _____ | <input type="radio"/> 정상 <input type="radio"/> 비정상 | <input type="radio"/> 예 <input type="radio"/> 아니오 |
| Basophils   | _____ | <input type="radio"/> 정상 <input type="radio"/> 비정상 | <input type="radio"/> 예 <input type="radio"/> 아니오 |
| ANC         | _____ | <input type="radio"/> 정상 <input type="radio"/> 비정상 | <input type="radio"/> 예 <input type="radio"/> 아니오 |

| Chemistry       |                             |                                                    |                                                   |
|-----------------|-----------------------------|----------------------------------------------------|---------------------------------------------------|
| ND              | <input type="checkbox"/> ND |                                                    |                                                   |
| 검사항목            | 결과                          | 정상 여부                                              | 임상적 유의성                                           |
| BUN             | _____                       | <input type="radio"/> 정상 <input type="radio"/> 비정상 | <input type="radio"/> 예 <input type="radio"/> 아니오 |
| Creatinine      | _____                       | <input type="radio"/> 정상 <input type="radio"/> 비정상 | <input type="radio"/> 예 <input type="radio"/> 아니오 |
| Total bilirubin | _____                       | <input type="radio"/> 정상 <input type="radio"/> 비정상 | <input type="radio"/> 예 <input type="radio"/> 아니오 |
| AST             | _____                       | <input type="radio"/> 정상 <input type="radio"/> 비정상 | <input type="radio"/> 예 <input type="radio"/> 아니오 |
| ALT             | _____                       | <input type="radio"/> 정상 <input type="radio"/> 비정상 | <input type="radio"/> 예 <input type="radio"/> 아니오 |
| ALP             | _____                       | <input type="radio"/> 정상 <input type="radio"/> 비정상 | <input type="radio"/> 예 <input type="radio"/> 아니오 |
| γGT             | _____                       | <input type="radio"/> 정상 <input type="radio"/> 비정상 | <input type="radio"/> 예 <input type="radio"/> 아니오 |
| LDH             | _____                       | <input type="radio"/> 정상 <input type="radio"/> 비정상 | <input type="radio"/> 예 <input type="radio"/> 아니오 |
| Total protein   | _____                       | <input type="radio"/> 정상 <input type="radio"/> 비정상 | <input type="radio"/> 예 <input type="radio"/> 아니오 |
| Albumin         | _____                       | <input type="radio"/> 정상 <input type="radio"/> 비정상 | <input type="radio"/> 예 <input type="radio"/> 아니오 |
| Globulin[자동계산]  | _____                       | <input type="radio"/> 정상 <input type="radio"/> 비정상 | <input type="radio"/> 예 <input type="radio"/> 아니오 |

|        |             |      |               |
|--------|-------------|------|---------------|
| C3D1   | PROTOCOL    | SITE | SCREENING NO. |
| 실험실 검사 | PHI-101-002 |      |               |
| 전자서명   |             |      |               |

| 검사항목              | 결과    | 정상 여부                                              | 임상적 유의성                                           |
|-------------------|-------|----------------------------------------------------|---------------------------------------------------|
| Ca                | _____ | <input type="radio"/> 정상 <input type="radio"/> 비정상 | <input type="radio"/> 예 <input type="radio"/> 아니오 |
| Mg                | _____ | <input type="radio"/> 정상 <input type="radio"/> 비정상 | <input type="radio"/> 예 <input type="radio"/> 아니오 |
| Na                | _____ | <input type="radio"/> 정상 <input type="radio"/> 비정상 | <input type="radio"/> 예 <input type="radio"/> 아니오 |
| K                 | _____ | <input type="radio"/> 정상 <input type="radio"/> 비정상 | <input type="radio"/> 예 <input type="radio"/> 아니오 |
| Cl                | _____ | <input type="radio"/> 정상 <input type="radio"/> 비정상 | <input type="radio"/> 예 <input type="radio"/> 아니오 |
| P                 | _____ | <input type="radio"/> 정상 <input type="radio"/> 비정상 | <input type="radio"/> 예 <input type="radio"/> 아니오 |
| Total cholesterol | _____ | <input type="radio"/> 정상 <input type="radio"/> 비정상 | <input type="radio"/> 예 <input type="radio"/> 아니오 |
| Triglyceride      | _____ | <input type="radio"/> 정상 <input type="radio"/> 비정상 | <input type="radio"/> 예 <input type="radio"/> 아니오 |
| CPK               | _____ | <input type="radio"/> 정상 <input type="radio"/> 비정상 | <input type="radio"/> 예 <input type="radio"/> 아니오 |
| Glucose           | _____ | <input type="radio"/> 정상 <input type="radio"/> 비정상 | <input type="radio"/> 예 <input type="radio"/> 아니오 |
| CrCl[자동계산]        | _____ |                                                    |                                                   |

|             |             |      |               |
|-------------|-------------|------|---------------|
| C3D1        | PROTOCOL    | SITE | SCREENING NO. |
| 12-Lead ECG | PHI-101-002 |      |               |
| 전자서명        |             |      |               |

| 12-Lead ECG                                                                                                                                                                                                                                      |            |                                                      |              |             |              |              |
|--------------------------------------------------------------------------------------------------------------------------------------------------------------------------------------------------------------------------------------------------|------------|------------------------------------------------------|--------------|-------------|--------------|--------------|
| ND                                                                                                                                                                                                                                               |            | <input type="checkbox"/> ND                          |              |             |              |              |
| 미실시인 경우 사유                                                                                                                                                                                                                                       |            | _____                                                |              |             |              |              |
| 검사일                                                                                                                                                                                                                                              |            | _____                                                |              |             |              |              |
| 측정횟수                                                                                                                                                                                                                                             |            | <input type="radio"/> 1회<br><input type="radio"/> 3회 |              |             |              |              |
| BBB 여부                                                                                                                                                                                                                                           |            | <input type="radio"/> 예<br><input type="radio"/> 아니오 |              |             |              |              |
| No.                                                                                                                                                                                                                                              | Heart Rate | PR Interval                                          | QRS Duration | QT Interval | QTcB [자동 계산] | QTcF [자동 계산] |
| 1차                                                                                                                                                                                                                                               | __ bpm     | __ msec                                              | __ msec      | __ msec     | __           | __           |
| 2차                                                                                                                                                                                                                                               | __ bpm     | __ msec                                              | __ msec      | __ msec     | __           | __           |
| 3차                                                                                                                                                                                                                                               | __ bpm     | __ msec                                              | __ msec      | __ msec     | __           | __           |
| QTcB 평균[자동계산]                                                                                                                                                                                                                                    |            | __                                                   |              |             |              |              |
| QTcF 평균[자동계산]                                                                                                                                                                                                                                    |            | __                                                   |              |             |              |              |
| 임상적으로 유의한 비정상 소견이 있습니까?                                                                                                                                                                                                                          |            | <input type="radio"/> 예<br><input type="radio"/> 아니오 |              |             |              |              |
| <p>* 동의서 취득 이후 임상적으로 유의한 비정상 소견이 있을 경우, 비정상 소견은 '이상반응'에 기록하십시오.<br/>           * Screen, C1D1 시점에서는 3회 측정하고, 이후 주기에서는 1회만 수행합니다.<br/>           (단, ECG를 통해 QT 간격 연장이 입증된 경우, 단기간(즉시)에 추가로 2개의 ECG를 수행하여 최종 3개 ECG의 평균 QTc interval을 확인합니다.)</p> |            |                                                      |              |             |              |              |

| C3D1              | PROTOCOL    | SITE | SCREENING NO. |
|-------------------|-------------|------|---------------|
| ECHO 또는 MUGA scan | PHI-101-002 |      |               |
| 전자서명              |             |      |               |

| ECHO 또는 MUGA scan                                            |                                                               |
|--------------------------------------------------------------|---------------------------------------------------------------|
| ND                                                           | <input type="checkbox"/> ND                                   |
| 미실시인 경우 사유                                                   | _____<br>_____<br>_____                                       |
| 검사일                                                          | _____                                                         |
| 검사 방법                                                        | <input type="radio"/> ECHO<br><input type="radio"/> MUGA scan |
| 좌심실구출률(LVEF)                                                 | ___ %                                                         |
| 임상적으로 유의한 비정상 소견이 있습니까?                                      | <input type="radio"/> 예<br><input type="radio"/> 아니오          |
| * 동의서 취득 이후 임상적으로 유의한 비정상 소견이 있을 경우, 비정상 소견은 '이상반응'에 기록하십시오. |                                                               |

|       |             |      |               |
|-------|-------------|------|---------------|
| C3D1  | PROTOCOL    | SITE | SCREENING NO. |
| PK 채혈 | PHI-101-002 |      |               |
| 전자서명  |             |      |               |

| PK 채혈        |                             |       |       |
|--------------|-----------------------------|-------|-------|
| ND           | <input type="checkbox"/> ND |       |       |
| 미실시인 경우 사유   | <hr/> <hr/> <hr/>           |       |       |
| PHI-101 투약일  | _____                       |       |       |
| PHI-101 투약시간 | _____                       |       |       |
| 채혈 시점        | ND                          | 채혈일   | 채혈 시간 |
| 투여 전(-30분)   | <input type="checkbox"/>    | _____ | _____ |
| 투여 후 1~3시간   | <input type="checkbox"/>    | _____ | _____ |



|       |             |      |               |
|-------|-------------|------|---------------|
| C3D15 | PROTOCOL    | SITE | SCREENING NO. |
| 방문일   | PHI-101-002 |      |               |
| 전자서명  |             |      |               |

|            |       |
|------------|-------|
| <b>방문일</b> |       |
| 방문일        | _____ |

|                                                                           |
|---------------------------------------------------------------------------|
| <b>선행/병용약물 확인</b>                                                         |
| 지난 방문과 비교하였을 때, 새롭게 투여되었거나 투여 용량이 변경된 병용약물이 있는 경우 선행/병용약물 페이지에 기록하여 주십시오. |

|                                                                                                                     |
|---------------------------------------------------------------------------------------------------------------------|
| <b>이상반응 확인</b>                                                                                                      |
| 지난 방문과 비교하였을 때, 새롭게 발생한 이상반응이 있을 경우 이상반응 페이지에 기록하여 주십시오.<br>(만약, EOT방문 전 새로운 항암요법이 수행되는 경우에는 해당 시점까지만 이상반응을 수집합니다.) |

|            |             |      |               |
|------------|-------------|------|---------------|
| C3D15      | PROTOCOL    | SITE | SCREENING NO. |
| 활력징후, 신체계측 | PHI-101-002 |      |               |
| 전자서명       |             |      |               |

| 활력징후                                                       |                                                      |
|------------------------------------------------------------|------------------------------------------------------|
| ND                                                         | <input type="checkbox"/> ND                          |
| 미실시인 경우 사유                                                 | _____<br>_____<br>_____                              |
| 5분 이상 안정을 취한 후 앉은 자세(좌위)에서 측정합니다.                          |                                                      |
| 측정일                                                        | _____                                                |
| 수축기 혈압                                                     | _ mmHg                                               |
| 이완기 혈압                                                     | _ mmHg                                               |
| 맥박                                                         | _ 회/분                                                |
| 호흡수                                                        | _ 회/분                                                |
| 체온                                                         | _ °C                                                 |
| 임상적으로 유의한 비정상 소견이 있습니까?                                    | <input type="radio"/> 예<br><input type="radio"/> 아니오 |
| 동역서 취득 이후 임상적으로 유의한 비정상 소견이 있을 경우, 비정상 소견은 '이상반응'에 기록하십시오. |                                                      |

|       |             |      |               |
|-------|-------------|------|---------------|
| C3D15 | PROTOCOL    | SITE | SCREENING NO. |
| 신체검진  | PHI-101-002 |      |               |
| 전자서명  |             |      |               |

### 신체검진

|                                                |                                                                                             |
|------------------------------------------------|---------------------------------------------------------------------------------------------|
| ND                                             | <input type="checkbox"/> ND                                                                 |
| 미실시인 경우 사유                                     | _____<br>_____<br>_____                                                                     |
| 검진일                                            | _____                                                                                       |
| 지난 방문과 비교하였을 때, 각 신체기관 검진 결과 새로운 비정상 소견이 있습니까? | <input type="radio"/> 예 → <u>아래 표에 신체기관 및 상세내용을 기재하여 주십시오.</u><br><input type="radio"/> 아니오 |

동의서 취득 이후 임상적으로 유의한 비정상 소견이 있을 경우, 비정상 소견은 '이상반응'에 기록하십시오.

| No | 신체기관 | 임상적 유의성                                           |
|----|------|---------------------------------------------------|
| 1  | —▼   | <input type="radio"/> 예 <input type="radio"/> 아니오 |

|         |                                                            |
|---------|------------------------------------------------------------|
| 신체기관    | 외관, 피부, 두/경부, 흉부/폐, 심장, 복부, 비뇨/생식계, 사지, 근골격계, 신경계, 림프절, 기타 |
| 신체기관_기타 | _____<br>_____<br>_____                                    |

|         |             |      |               |
|---------|-------------|------|---------------|
| C3D15   | PROTOCOL    | SITE | SCREENING NO. |
| ECOG PS | PHI-101-002 |      |               |
| 전자서명    |             |      |               |

| ECOG PS    |                                                                                                                                                                                                    |
|------------|----------------------------------------------------------------------------------------------------------------------------------------------------------------------------------------------------|
| ND         | <input type="checkbox"/> ND                                                                                                                                                                        |
| 미실시인 경우 사유 | <hr/> <hr/> <hr/>                                                                                                                                                                                  |
| 평가일        | _____                                                                                                                                                                                              |
| ECOG PS    | <input type="radio"/> Grade 0<br><input type="radio"/> Grade 1<br><input type="radio"/> Grade 2<br><input type="radio"/> Grade 3<br><input type="radio"/> Grade 4<br><input type="radio"/> Grade 5 |

|        |             |      |               |
|--------|-------------|------|---------------|
| C3D15  | PROTOCOL    | SITE | SCREENING NO. |
| 실험실 검사 | PHI-101-002 |      |               |
| 전자서명   |             |      |               |

| 실험실 검사                                                                                                                                 |                                                      |
|----------------------------------------------------------------------------------------------------------------------------------------|------------------------------------------------------|
| ND                                                                                                                                     | <input type="checkbox"/> ND                          |
| 미실시인 경우 사유                                                                                                                             | _____<br>_____<br>_____                              |
| 최소 8시간 금식 여부                                                                                                                           | <input type="radio"/> 예<br><input type="radio"/> 아니오 |
| 검체 채취일                                                                                                                                 | _____                                                |
| <p>* 동의서 취득 이후 검사 결과가 'Clinical Significance' 일 경우 비정상 소견은 '이상반응'에 기록하십시오.<br/>* 검사 항목별 단위는 "정상 참고 범위"와 함께 제공되므로 아래 결과에 기록하지 않습니다.</p> |                                                      |

| Hematology  |                             |                                                    |                                                   |
|-------------|-----------------------------|----------------------------------------------------|---------------------------------------------------|
| ND          | <input type="checkbox"/> ND |                                                    |                                                   |
| 검사항목        | 결과                          | 정상 여부                                              | 임상적 유의성                                           |
| WBC         | _____                       | <input type="radio"/> 정상 <input type="radio"/> 비정상 | <input type="radio"/> 예 <input type="radio"/> 아니오 |
| RBC         | _____                       | <input type="radio"/> 정상 <input type="radio"/> 비정상 | <input type="radio"/> 예 <input type="radio"/> 아니오 |
| Hemoglobin  | _____                       | <input type="radio"/> 정상 <input type="radio"/> 비정상 | <input type="radio"/> 예 <input type="radio"/> 아니오 |
| Hematocrit  | _____                       | <input type="radio"/> 정상 <input type="radio"/> 비정상 | <input type="radio"/> 예 <input type="radio"/> 아니오 |
| Platelet    | _____                       | <input type="radio"/> 정상 <input type="radio"/> 비정상 | <input type="radio"/> 예 <input type="radio"/> 아니오 |
| MCV         | _____                       | <input type="radio"/> 정상 <input type="radio"/> 비정상 | <input type="radio"/> 예 <input type="radio"/> 아니오 |
| MCH         | _____                       | <input type="radio"/> 정상 <input type="radio"/> 비정상 | <input type="radio"/> 예 <input type="radio"/> 아니오 |
| MCHC        | _____                       | <input type="radio"/> 정상 <input type="radio"/> 비정상 | <input type="radio"/> 예 <input type="radio"/> 아니오 |
| Neutrophils | _____                       | <input type="radio"/> 정상 <input type="radio"/> 비정상 | <input type="radio"/> 예 <input type="radio"/> 아니오 |

|        |             |      |               |
|--------|-------------|------|---------------|
| C3D15  | PROTOCOL    | SITE | SCREENING NO. |
| 실험실 검사 | PHI-101-002 |      |               |
| 전자서명   |             |      |               |

| 검사항목        | 결과    | 정상 여부                                              | 임상적 유의성                                           |
|-------------|-------|----------------------------------------------------|---------------------------------------------------|
| Lymphocytes | _____ | <input type="radio"/> 정상 <input type="radio"/> 비정상 | <input type="radio"/> 예 <input type="radio"/> 아니오 |
| Monocytes   | _____ | <input type="radio"/> 정상 <input type="radio"/> 비정상 | <input type="radio"/> 예 <input type="radio"/> 아니오 |
| Eosinophils | _____ | <input type="radio"/> 정상 <input type="radio"/> 비정상 | <input type="radio"/> 예 <input type="radio"/> 아니오 |
| Basophils   | _____ | <input type="radio"/> 정상 <input type="radio"/> 비정상 | <input type="radio"/> 예 <input type="radio"/> 아니오 |
| ANC         | _____ | <input type="radio"/> 정상 <input type="radio"/> 비정상 | <input type="radio"/> 예 <input type="radio"/> 아니오 |

| Chemistry       |                             |                                                    |                                                   |
|-----------------|-----------------------------|----------------------------------------------------|---------------------------------------------------|
| ND              | <input type="checkbox"/> ND |                                                    |                                                   |
| 검사항목            | 결과                          | 정상 여부                                              | 임상적 유의성                                           |
| BUN             | _____                       | <input type="radio"/> 정상 <input type="radio"/> 비정상 | <input type="radio"/> 예 <input type="radio"/> 아니오 |
| Creatinine      | _____                       | <input type="radio"/> 정상 <input type="radio"/> 비정상 | <input type="radio"/> 예 <input type="radio"/> 아니오 |
| Total bilirubin | _____                       | <input type="radio"/> 정상 <input type="radio"/> 비정상 | <input type="radio"/> 예 <input type="radio"/> 아니오 |
| AST             | _____                       | <input type="radio"/> 정상 <input type="radio"/> 비정상 | <input type="radio"/> 예 <input type="radio"/> 아니오 |
| ALT             | _____                       | <input type="radio"/> 정상 <input type="radio"/> 비정상 | <input type="radio"/> 예 <input type="radio"/> 아니오 |
| ALP             | _____                       | <input type="radio"/> 정상 <input type="radio"/> 비정상 | <input type="radio"/> 예 <input type="radio"/> 아니오 |
| γGT             | _____                       | <input type="radio"/> 정상 <input type="radio"/> 비정상 | <input type="radio"/> 예 <input type="radio"/> 아니오 |
| LDH             | _____                       | <input type="radio"/> 정상 <input type="radio"/> 비정상 | <input type="radio"/> 예 <input type="radio"/> 아니오 |
| Total protein   | _____                       | <input type="radio"/> 정상 <input type="radio"/> 비정상 | <input type="radio"/> 예 <input type="radio"/> 아니오 |
| Albumin         | _____                       | <input type="radio"/> 정상 <input type="radio"/> 비정상 | <input type="radio"/> 예 <input type="radio"/> 아니오 |
| Globulin[자동계산]  | _____                       | <input type="radio"/> 정상 <input type="radio"/> 비정상 | <input type="radio"/> 예 <input type="radio"/> 아니오 |

|        |             |      |               |
|--------|-------------|------|---------------|
| C3D15  | PROTOCOL    | SITE | SCREENING NO. |
| 실험실 검사 | PHI-101-002 |      |               |
| 전자서명   |             |      |               |

| 검사항목              | 결과    | 정상 여부                                              | 임상적 유의성                                           |
|-------------------|-------|----------------------------------------------------|---------------------------------------------------|
| Ca                | _____ | <input type="radio"/> 정상 <input type="radio"/> 비정상 | <input type="radio"/> 예 <input type="radio"/> 아니오 |
| Mg                | _____ | <input type="radio"/> 정상 <input type="radio"/> 비정상 | <input type="radio"/> 예 <input type="radio"/> 아니오 |
| Na                | _____ | <input type="radio"/> 정상 <input type="radio"/> 비정상 | <input type="radio"/> 예 <input type="radio"/> 아니오 |
| K                 | _____ | <input type="radio"/> 정상 <input type="radio"/> 비정상 | <input type="radio"/> 예 <input type="radio"/> 아니오 |
| Cl                | _____ | <input type="radio"/> 정상 <input type="radio"/> 비정상 | <input type="radio"/> 예 <input type="radio"/> 아니오 |
| P                 | _____ | <input type="radio"/> 정상 <input type="radio"/> 비정상 | <input type="radio"/> 예 <input type="radio"/> 아니오 |
| Total cholesterol | _____ | <input type="radio"/> 정상 <input type="radio"/> 비정상 | <input type="radio"/> 예 <input type="radio"/> 아니오 |
| Triglyceride      | _____ | <input type="radio"/> 정상 <input type="radio"/> 비정상 | <input type="radio"/> 예 <input type="radio"/> 아니오 |
| CPK               | _____ | <input type="radio"/> 정상 <input type="radio"/> 비정상 | <input type="radio"/> 예 <input type="radio"/> 아니오 |
| Glucose           | _____ | <input type="radio"/> 정상 <input type="radio"/> 비정상 | <input type="radio"/> 예 <input type="radio"/> 아니오 |
| CrCl[자동계산]        | _____ |                                                    |                                                   |

|             |             |      |               |
|-------------|-------------|------|---------------|
| C3D15       | PROTOCOL    | SITE | SCREENING NO. |
| 12-Lead ECG | PHI-101-002 |      |               |
| 전자서명        |             |      |               |

| 12-Lead ECG                                                                                                                                                                                                       |            |                                                      |              |             |              |              |
|-------------------------------------------------------------------------------------------------------------------------------------------------------------------------------------------------------------------|------------|------------------------------------------------------|--------------|-------------|--------------|--------------|
| ND                                                                                                                                                                                                                |            | <input type="checkbox"/> ND                          |              |             |              |              |
| 미실시인 경우 사유                                                                                                                                                                                                        |            | _____<br>_____<br>_____                              |              |             |              |              |
| 검사일                                                                                                                                                                                                               |            | _____                                                |              |             |              |              |
| 측정횟수                                                                                                                                                                                                              |            | <input type="radio"/> 1회<br><input type="radio"/> 3회 |              |             |              |              |
| BBB 여부                                                                                                                                                                                                            |            | <input type="radio"/> 예<br><input type="radio"/> 아니오 |              |             |              |              |
| No.                                                                                                                                                                                                               | Heart Rate | PR Interval                                          | QRS Duration | QT Interval | QTcB [자동 계산] | QTcF [자동 계산] |
| 1차                                                                                                                                                                                                                | __ bpm     | __ msec                                              | __ msec      | __ msec     | __           | __           |
| 2차                                                                                                                                                                                                                | __ bpm     | __ msec                                              | __ msec      | __ msec     | __           | __           |
| 3차                                                                                                                                                                                                                | __ bpm     | __ msec                                              | __ msec      | __ msec     | __           | __           |
| QTcB 평균[자동계산]                                                                                                                                                                                                     |            | __                                                   |              |             |              |              |
| QTcF 평균[자동계산]                                                                                                                                                                                                     |            | __                                                   |              |             |              |              |
| 임상적으로 유의한 비정상 소견이 있습니까?                                                                                                                                                                                           |            | <input type="radio"/> 예<br><input type="radio"/> 아니오 |              |             |              |              |
| * 동의서 취득 이후 임상적으로 유의한 비정상 소견이 있을 경우, 비정상 소견은 '이상반응'에 기록하십시오.<br>* Screen, C1D1 시점에서는 3회 측정하고, 이후 주기에서는 1회만 수행합니다.<br>(단, ECG를 통해 QT 간격 연장이 입증된 경우, 단기간(즉시)에 추가로 2개의 ECG를 수행하여 최종 3개 ECG의 평균 QTc interval을 확인합니다.) |            |                                                      |              |             |              |              |



|                   |             |      |               |
|-------------------|-------------|------|---------------|
| C3D15             | PROTOCOL    | SITE | SCREENING NO. |
| ECHO 또는 MUGA scan | PHI-101-002 |      |               |
| 전자서명              |             |      |               |

| ECHO 또는 MUGA scan                                            |                                                               |
|--------------------------------------------------------------|---------------------------------------------------------------|
| ND                                                           | <input type="checkbox"/> ND                                   |
| 미실시인 경우 사유                                                   | _____<br>_____<br>_____                                       |
| 검사일                                                          | _____                                                         |
| 검사 방법                                                        | <input type="radio"/> ECHO<br><input type="radio"/> MUGA scan |
| 좌심실구출률(LVEF)                                                 | ___ %                                                         |
| 임상적으로 유의한 비정상 소견이 있습니까?                                      | <input type="radio"/> 예<br><input type="radio"/> 아니오          |
| * 동의서 취득 이후 임상적으로 유의한 비정상 소견이 있을 경우, 비정상 소견은 '이상반응'에 기록하십시오. |                                                               |

|      |             |      |               |
|------|-------------|------|---------------|
| C4D1 | PROTOCOL    | SITE | SCREENING NO. |
| 방문일  | PHI-101-002 |      |               |
| 전자서명 |             |      |               |

|            |       |
|------------|-------|
| <b>방문일</b> |       |
| 방문일        | _____ |

|                                                                           |
|---------------------------------------------------------------------------|
| <b>선행/병용약물 확인</b>                                                         |
| 지난 방문과 비교하였을 때, 새롭게 투여되었거나 투여 용량이 변경된 병용약물이 있는 경우 선행/병용약물 페이지에 기록하여 주십시오. |

|                                                                                                                     |
|---------------------------------------------------------------------------------------------------------------------|
| <b>이상반응 확인</b>                                                                                                      |
| 지난 방문과 비교하였을 때, 새롭게 발생한 이상반응이 있을 경우 이상반응 페이지에 기록하여 주십시오.<br>(만약, EOT방문 전 새로운 항암요법이 수행되는 경우에는 해당 시점까지만 이상반응을 수집합니다.) |

| C4D1       | PROTOCOL    | SITE | SCREENING NO. |
|------------|-------------|------|---------------|
| 활력징후, 신체계측 | PHI-101-002 |      |               |
| 전자서명       |             |      |               |

| 활력징후                                                       |                                                      |
|------------------------------------------------------------|------------------------------------------------------|
| ND                                                         | <input type="checkbox"/> ND                          |
| 미실시인 경우 사유                                                 | _____<br>_____<br>_____                              |
| 5분 이상 안정을 취한 후 앉은 자세(좌위)에서 측정합니다.                          |                                                      |
| 측정일                                                        | _____                                                |
| 수축기 혈압                                                     | _ mmHg                                               |
| 이완기 혈압                                                     | _ mmHg                                               |
| 맥박                                                         | _ 회/분                                                |
| 호흡수                                                        | _ 회/분                                                |
| 체온                                                         | _ °C                                                 |
| 임상적으로 유의한 비정상 소견이 있습니까?                                    | <input type="radio"/> 예<br><input type="radio"/> 아니오 |
| 동역서 취득 이후 임상적으로 유의한 비정상 소견이 있을 경우, 비정상 소견은 '이상반응'에 기록하십시오. |                                                      |

| 신체계측       |                             |
|------------|-----------------------------|
| ND         | <input type="checkbox"/> ND |
| 미실시인 경우 사유 | _____<br>_____<br>_____     |
| 측정일        | _____                       |
| 체중         | _ kg                        |

|      |             |      |               |
|------|-------------|------|---------------|
| C4D1 | PROTOCOL    | SITE | SCREENING NO. |
| 신체검진 | PHI-101-002 |      |               |
| 전자서명 |             |      |               |

### 신체검진

|                                                |                                                                                             |
|------------------------------------------------|---------------------------------------------------------------------------------------------|
| ND                                             | <input type="checkbox"/> ND                                                                 |
| 미실시인 경우 사유                                     | _____<br>_____<br>_____                                                                     |
| 검진일                                            | _____                                                                                       |
| 지난 방문과 비교하였을 때, 각 신체기관 검진 결과 새로운 비정상 소견이 있습니까? | <input type="radio"/> 예 → <u>아래 표에 신체기관 및 상세내용을 기재하여 주십시오.</u><br><input type="radio"/> 아니오 |

동의서 취득 이후 임상적으로 유의한 비정상 소견이 있을 경우, 비정상 소견은 '이상반응'에 기록하십시오.

| No | 신체기관 | 임상적 유의성                                           |
|----|------|---------------------------------------------------|
| 1  | —▼   | <input type="radio"/> 예 <input type="radio"/> 아니오 |

|         |                                                            |
|---------|------------------------------------------------------------|
| 신체기관    | 외관, 피부, 두/경부, 흉부/폐, 심장, 복부, 비뇨/생식계, 사지, 근골격계, 신경계, 림프절, 기타 |
| 신체기관_기타 | _____<br>_____<br>_____                                    |

|         |             |      |               |
|---------|-------------|------|---------------|
| C4D1    | PROTOCOL    | SITE | SCREENING NO. |
| ECOG PS | PHI-101-002 |      |               |
| 전자서명    |             |      |               |

| ECOG PS    |                                                                                                                                                                                                    |
|------------|----------------------------------------------------------------------------------------------------------------------------------------------------------------------------------------------------|
| ND         | <input type="checkbox"/> ND                                                                                                                                                                        |
| 미실시인 경우 사유 | <hr/> <hr/> <hr/>                                                                                                                                                                                  |
| 평가일        | _____                                                                                                                                                                                              |
| ECOG PS    | <input type="radio"/> Grade 0<br><input type="radio"/> Grade 1<br><input type="radio"/> Grade 2<br><input type="radio"/> Grade 3<br><input type="radio"/> Grade 4<br><input type="radio"/> Grade 5 |

|      |             |      |               |
|------|-------------|------|---------------|
| C4D1 | PROTOCOL    | SITE | SCREENING NO. |
| 임신검사 | PHI-101-002 |      |               |
| 전자서명 |             |      |               |

| 임신검사                                 |                                                                    |
|--------------------------------------|--------------------------------------------------------------------|
| ND                                   | <input type="checkbox"/> ND                                        |
| 미실시인 경우 사유                           | _____<br>_____<br>_____                                            |
| 검사일                                  | _____                                                              |
| 검사 방법                                | <input type="radio"/> urine-hCG<br><input type="radio"/> serum-hCG |
| 검사결과                                 | <input type="radio"/> 양성<br><input type="radio"/> 음성               |
| urine-hCG(및/또는 serum hCG) 검사를 실시합니다. |                                                                    |

|        |             |      |               |
|--------|-------------|------|---------------|
| C4D1   | PROTOCOL    | SITE | SCREENING NO. |
| 실험실 검사 | PHI-101-002 |      |               |
| 전자서명   |             |      |               |

| 실험실 검사                                                                                                                                          |                                                      |
|-------------------------------------------------------------------------------------------------------------------------------------------------|------------------------------------------------------|
| ND                                                                                                                                              | <input type="checkbox"/> ND                          |
| 미실시인 경우 사유                                                                                                                                      | _____<br>_____<br>_____                              |
| 최소 8시간 금식 여부                                                                                                                                    | <input type="radio"/> 예<br><input type="radio"/> 아니오 |
| 검체 채취일                                                                                                                                          | _____                                                |
| <p>* 동의서 취득 이후 검사 결과가 'Clinical Significance' 일 경우 비정상 소견은 '이상반응'에 기록하십시오.<br/>         * 검사 항목별 단위는 "정상 참고 범위"와 함께 제공되므로 아래 결과에 기록하지 않습니다.</p> |                                                      |

| Hematology  |                             |                                                    |                                                   |
|-------------|-----------------------------|----------------------------------------------------|---------------------------------------------------|
| ND          | <input type="checkbox"/> ND |                                                    |                                                   |
| 검사항목        | 결과                          | 정상 여부                                              | 임상적 유의성                                           |
| WBC         | _____                       | <input type="radio"/> 정상 <input type="radio"/> 비정상 | <input type="radio"/> 예 <input type="radio"/> 아니오 |
| RBC         | _____                       | <input type="radio"/> 정상 <input type="radio"/> 비정상 | <input type="radio"/> 예 <input type="radio"/> 아니오 |
| Hemoglobin  | _____                       | <input type="radio"/> 정상 <input type="radio"/> 비정상 | <input type="radio"/> 예 <input type="radio"/> 아니오 |
| Hematocrit  | _____                       | <input type="radio"/> 정상 <input type="radio"/> 비정상 | <input type="radio"/> 예 <input type="radio"/> 아니오 |
| Platelet    | _____                       | <input type="radio"/> 정상 <input type="radio"/> 비정상 | <input type="radio"/> 예 <input type="radio"/> 아니오 |
| MCV         | _____                       | <input type="radio"/> 정상 <input type="radio"/> 비정상 | <input type="radio"/> 예 <input type="radio"/> 아니오 |
| MCH         | _____                       | <input type="radio"/> 정상 <input type="radio"/> 비정상 | <input type="radio"/> 예 <input type="radio"/> 아니오 |
| MCHC        | _____                       | <input type="radio"/> 정상 <input type="radio"/> 비정상 | <input type="radio"/> 예 <input type="radio"/> 아니오 |
| Neutrophils | _____                       | <input type="radio"/> 정상 <input type="radio"/> 비정상 | <input type="radio"/> 예 <input type="radio"/> 아니오 |

|        |             |      |               |
|--------|-------------|------|---------------|
| C4D1   | PROTOCOL    | SITE | SCREENING NO. |
| 실험실 검사 | PHI-101-002 |      |               |
| 전자서명   |             |      |               |

| 검사항목        | 결과    | 정상 여부                                              | 임상적 유의성                                           |
|-------------|-------|----------------------------------------------------|---------------------------------------------------|
| Lymphocytes | _____ | <input type="radio"/> 정상 <input type="radio"/> 비정상 | <input type="radio"/> 예 <input type="radio"/> 아니오 |
| Monocytes   | _____ | <input type="radio"/> 정상 <input type="radio"/> 비정상 | <input type="radio"/> 예 <input type="radio"/> 아니오 |
| Eosinophils | _____ | <input type="radio"/> 정상 <input type="radio"/> 비정상 | <input type="radio"/> 예 <input type="radio"/> 아니오 |
| Basophils   | _____ | <input type="radio"/> 정상 <input type="radio"/> 비정상 | <input type="radio"/> 예 <input type="radio"/> 아니오 |
| ANC         | _____ | <input type="radio"/> 정상 <input type="radio"/> 비정상 | <input type="radio"/> 예 <input type="radio"/> 아니오 |

| Chemistry       |                             |                                                    |                                                   |
|-----------------|-----------------------------|----------------------------------------------------|---------------------------------------------------|
| ND              | <input type="checkbox"/> ND |                                                    |                                                   |
| 검사항목            | 결과                          | 정상 여부                                              | 임상적 유의성                                           |
| BUN             | _____                       | <input type="radio"/> 정상 <input type="radio"/> 비정상 | <input type="radio"/> 예 <input type="radio"/> 아니오 |
| Creatinine      | _____                       | <input type="radio"/> 정상 <input type="radio"/> 비정상 | <input type="radio"/> 예 <input type="radio"/> 아니오 |
| Total bilirubin | _____                       | <input type="radio"/> 정상 <input type="radio"/> 비정상 | <input type="radio"/> 예 <input type="radio"/> 아니오 |
| AST             | _____                       | <input type="radio"/> 정상 <input type="radio"/> 비정상 | <input type="radio"/> 예 <input type="radio"/> 아니오 |
| ALT             | _____                       | <input type="radio"/> 정상 <input type="radio"/> 비정상 | <input type="radio"/> 예 <input type="radio"/> 아니오 |
| ALP             | _____                       | <input type="radio"/> 정상 <input type="radio"/> 비정상 | <input type="radio"/> 예 <input type="radio"/> 아니오 |
| γGT             | _____                       | <input type="radio"/> 정상 <input type="radio"/> 비정상 | <input type="radio"/> 예 <input type="radio"/> 아니오 |
| LDH             | _____                       | <input type="radio"/> 정상 <input type="radio"/> 비정상 | <input type="radio"/> 예 <input type="radio"/> 아니오 |
| Total protein   | _____                       | <input type="radio"/> 정상 <input type="radio"/> 비정상 | <input type="radio"/> 예 <input type="radio"/> 아니오 |
| Albumin         | _____                       | <input type="radio"/> 정상 <input type="radio"/> 비정상 | <input type="radio"/> 예 <input type="radio"/> 아니오 |
| Globulin[자동계산]  | _____                       | <input type="radio"/> 정상 <input type="radio"/> 비정상 | <input type="radio"/> 예 <input type="radio"/> 아니오 |



|        |             |      |               |
|--------|-------------|------|---------------|
| C4D1   | PROTOCOL    | SITE | SCREENING NO. |
| 실험실 검사 | PHI-101-002 |      |               |
| 전자서명   |             |      |               |

| 검사항목              | 결과    | 정상 여부                                              | 임상적 유의성                                           |
|-------------------|-------|----------------------------------------------------|---------------------------------------------------|
| Ca                | _____ | <input type="radio"/> 정상 <input type="radio"/> 비정상 | <input type="radio"/> 예 <input type="radio"/> 아니오 |
| Mg                | _____ | <input type="radio"/> 정상 <input type="radio"/> 비정상 | <input type="radio"/> 예 <input type="radio"/> 아니오 |
| Na                | _____ | <input type="radio"/> 정상 <input type="radio"/> 비정상 | <input type="radio"/> 예 <input type="radio"/> 아니오 |
| K                 | _____ | <input type="radio"/> 정상 <input type="radio"/> 비정상 | <input type="radio"/> 예 <input type="radio"/> 아니오 |
| Cl                | _____ | <input type="radio"/> 정상 <input type="radio"/> 비정상 | <input type="radio"/> 예 <input type="radio"/> 아니오 |
| P                 | _____ | <input type="radio"/> 정상 <input type="radio"/> 비정상 | <input type="radio"/> 예 <input type="radio"/> 아니오 |
| Total cholesterol | _____ | <input type="radio"/> 정상 <input type="radio"/> 비정상 | <input type="radio"/> 예 <input type="radio"/> 아니오 |
| Triglyceride      | _____ | <input type="radio"/> 정상 <input type="radio"/> 비정상 | <input type="radio"/> 예 <input type="radio"/> 아니오 |
| CPK               | _____ | <input type="radio"/> 정상 <input type="radio"/> 비정상 | <input type="radio"/> 예 <input type="radio"/> 아니오 |
| Glucose           | _____ | <input type="radio"/> 정상 <input type="radio"/> 비정상 | <input type="radio"/> 예 <input type="radio"/> 아니오 |
| CrCl[자동계산]        | _____ |                                                    |                                                   |

| Urinalysis       |                             |                                                    |                                                   |
|------------------|-----------------------------|----------------------------------------------------|---------------------------------------------------|
| ND               | <input type="checkbox"/> ND |                                                    |                                                   |
| 검사항목             | 결과                          | 정상 여부                                              | 임상적 유의성                                           |
| Specific gravity | _____                       | <input type="radio"/> 정상 <input type="radio"/> 비정상 | <input type="radio"/> 예 <input type="radio"/> 아니오 |
| pH               | _____                       | <input type="radio"/> 정상 <input type="radio"/> 비정상 | <input type="radio"/> 예 <input type="radio"/> 아니오 |
| Bilirubin[U]     | _____                       | <input type="radio"/> 정상 <input type="radio"/> 비정상 | <input type="radio"/> 예 <input type="radio"/> 아니오 |
| Urobilinogen[U]  | _____                       | <input type="radio"/> 정상 <input type="radio"/> 비정상 | <input type="radio"/> 예 <input type="radio"/> 아니오 |
| Blood[U]         | _____                       | <input type="radio"/> 정상 <input type="radio"/> 비정상 | <input type="radio"/> 예 <input type="radio"/> 아니오 |

|        |             |      |               |
|--------|-------------|------|---------------|
| C4D1   | PROTOCOL    | SITE | SCREENING NO. |
| 실험실 검사 | PHI-101-002 |      |               |
| 전자서명   |             |      |               |

| 검사항목                | 결과    | 정상 여부                                              | 임상적 유의성                                           |
|---------------------|-------|----------------------------------------------------|---------------------------------------------------|
| Glucose[U]          | _____ | <input type="radio"/> 정상 <input type="radio"/> 비정상 | <input type="radio"/> 예 <input type="radio"/> 아니오 |
| Protein[U] (Alb[U]) | _____ | <input type="radio"/> 정상 <input type="radio"/> 비정상 | <input type="radio"/> 예 <input type="radio"/> 아니오 |
| Ketones[U]          | _____ | <input type="radio"/> 정상 <input type="radio"/> 비정상 | <input type="radio"/> 예 <input type="radio"/> 아니오 |
| Leukocytes[U]       | _____ | <input type="radio"/> 정상 <input type="radio"/> 비정상 | <input type="radio"/> 예 <input type="radio"/> 아니오 |

| Thyroid Function Tests |                             |                                                    |                                                   |
|------------------------|-----------------------------|----------------------------------------------------|---------------------------------------------------|
| ND                     | <input type="checkbox"/> ND |                                                    |                                                   |
| 검사항목                   | 결과                          | 정상 여부                                              | 임상적 유의성                                           |
| TSH                    | _____                       | <input type="radio"/> 정상 <input type="radio"/> 비정상 | <input type="radio"/> 예 <input type="radio"/> 아니오 |
| Free T4                | _____                       | <input type="radio"/> 정상 <input type="radio"/> 비정상 | <input type="radio"/> 예 <input type="radio"/> 아니오 |

| Tests for HbA1c |                             |                                                    |                                                   |
|-----------------|-----------------------------|----------------------------------------------------|---------------------------------------------------|
| ND              | <input type="checkbox"/> ND |                                                    |                                                   |
| 검사항목            | 결과                          | 정상 여부                                              | 임상적 유의성                                           |
| HbA1c           | _____                       | <input type="radio"/> 정상 <input type="radio"/> 비정상 | <input type="radio"/> 예 <input type="radio"/> 아니오 |

| Coagulation Profile |                             |                                                    |                                                   |
|---------------------|-----------------------------|----------------------------------------------------|---------------------------------------------------|
| ND                  | <input type="checkbox"/> ND |                                                    |                                                   |
| 검사항목                | 결과                          | 정상 여부                                              | 임상적 유의성                                           |
| PT INR              | _____                       | <input type="radio"/> 정상 <input type="radio"/> 비정상 | <input type="radio"/> 예 <input type="radio"/> 아니오 |
| aPTT                | _____                       | <input type="radio"/> 정상 <input type="radio"/> 비정상 | <input type="radio"/> 예 <input type="radio"/> 아니오 |

|             |             |      |               |
|-------------|-------------|------|---------------|
| C4D1        | PROTOCOL    | SITE | SCREENING NO. |
| 12-Lead ECG | PHI-101-002 |      |               |
| 전자서명        |             |      |               |

| 12-Lead ECG                                                                                                                                                                                                                                      |            |                                                      |              |             |              |              |
|--------------------------------------------------------------------------------------------------------------------------------------------------------------------------------------------------------------------------------------------------|------------|------------------------------------------------------|--------------|-------------|--------------|--------------|
| ND                                                                                                                                                                                                                                               |            | <input type="checkbox"/> ND                          |              |             |              |              |
| 미실시인 경우 사유                                                                                                                                                                                                                                       |            | _____                                                |              |             |              |              |
| 검사일                                                                                                                                                                                                                                              |            | _____                                                |              |             |              |              |
| 측정횟수                                                                                                                                                                                                                                             |            | <input type="radio"/> 1회<br><input type="radio"/> 3회 |              |             |              |              |
| BBB 여부                                                                                                                                                                                                                                           |            | <input type="radio"/> 예<br><input type="radio"/> 아니오 |              |             |              |              |
| No.                                                                                                                                                                                                                                              | Heart Rate | PR Interval                                          | QRS Duration | QT Interval | QTcB [자동 계산] | QTcF [자동 계산] |
| 1차                                                                                                                                                                                                                                               | __ bpm     | __ msec                                              | __ msec      | __ msec     | __           | __           |
| 2차                                                                                                                                                                                                                                               | __ bpm     | __ msec                                              | __ msec      | __ msec     | __           | __           |
| 3차                                                                                                                                                                                                                                               | __ bpm     | __ msec                                              | __ msec      | __ msec     | __           | __           |
| QTcB 평균[자동계산]                                                                                                                                                                                                                                    |            | __                                                   |              |             |              |              |
| QTcF 평균[자동계산]                                                                                                                                                                                                                                    |            | __                                                   |              |             |              |              |
| 임상적으로 유의한 비정상 소견이 있습니까?                                                                                                                                                                                                                          |            | <input type="radio"/> 예<br><input type="radio"/> 아니오 |              |             |              |              |
| <p>* 동의서 취득 이후 임상적으로 유의한 비정상 소견이 있을 경우, 비정상 소견은 '이상반응'에 기록하십시오.<br/>           * Screen, C1D1 시점에서는 3회 측정하고, 이후 주기에서는 1회만 수행합니다.<br/>           (단, ECG를 통해 QT 간격 연장이 입증된 경우, 단기간(즉시)에 추가로 2개의 ECG를 수행하여 최종 3개 ECG의 평균 QTc interval을 확인합니다.)</p> |            |                                                      |              |             |              |              |

| C4D1              | PROTOCOL    | SITE | SCREENING NO. |
|-------------------|-------------|------|---------------|
| ECHO 또는 MUGA scan | PHI-101-002 |      |               |
| 전자서명              |             |      |               |

| ECHO 또는 MUGA scan                                            |                                                               |
|--------------------------------------------------------------|---------------------------------------------------------------|
| ND                                                           | <input type="checkbox"/> ND                                   |
| 미실시인 경우 사유                                                   | _____<br>_____<br>_____                                       |
| 검사일                                                          | _____                                                         |
| 검사 방법                                                        | <input type="radio"/> ECHO<br><input type="radio"/> MUGA scan |
| 좌심실구출률(LVEF)                                                 | ___ %                                                         |
| 임상적으로 유의한 비정상 소견이 있습니까?                                      | <input type="radio"/> 예<br><input type="radio"/> 아니오          |
| * 동의서 취득 이후 임상적으로 유의한 비정상 소견이 있을 경우, 비정상 소견은 '이상반응'에 기록하십시오. |                                                               |

|       |             |      |               |
|-------|-------------|------|---------------|
| C4D1  | PROTOCOL    | SITE | SCREENING NO. |
| PK 채혈 | PHI-101-002 |      |               |
| 전자서명  |             |      |               |

| PK 채혈        |                             |       |
|--------------|-----------------------------|-------|
| ND           | <input type="checkbox"/> ND |       |
| 미실시인 경우 사유   | <hr/> <hr/> <hr/>           |       |
| PHI-101 투약일  | _____                       |       |
| PHI-101 투약시간 | _____                       |       |
| No           | 채혈일                         | 채혈 시간 |
| 1            | _____                       | _____ |

| EOT  | PROTOCOL    | SITE | SCREENING NO. |
|------|-------------|------|---------------|
| 방문일  | PHI-101-002 |      |               |
| 전자서명 |             |      |               |

| 방문일 |       |
|-----|-------|
| 방문일 | _____ |

| 선행/병용약물 확인                                                                |
|---------------------------------------------------------------------------|
| 지난 방문과 비교하였을 때, 새롭게 투여되었거나 투여 용량이 변경된 병용약물이 있는 경우 선행/병용약물 페이지에 기록하여 주십시오. |

| 이상반응 확인                                                                                                             |
|---------------------------------------------------------------------------------------------------------------------|
| 지난 방문과 비교하였을 때, 새롭게 발생한 이상반응이 있을 경우 이상반응 페이지에 기록하여 주십시오.<br>(만약, EOT방문 전 새로운 항암요법이 수행되는 경우에는 해당 시점까지만 이상반응을 수집합니다.) |

| EOT        | PROTOCOL    | SITE | SCREENING NO. |
|------------|-------------|------|---------------|
| 활력징후, 신체계측 | PHI-101-002 |      |               |
| 전자서명       |             |      |               |

| 활력징후                                                       |                                                      |
|------------------------------------------------------------|------------------------------------------------------|
| ND                                                         | <input type="checkbox"/> ND                          |
| 미실시인 경우 사유                                                 | _____<br>_____<br>_____                              |
| 5분 이상 안정을 취한 후 앉은 자세(좌위)에서 측정합니다.                          |                                                      |
| 측정일                                                        | _____                                                |
| 수축기 혈압                                                     | _ mmHg                                               |
| 이완기 혈압                                                     | _ mmHg                                               |
| 맥박                                                         | _ 회/분                                                |
| 호흡수                                                        | _ 회/분                                                |
| 체온                                                         | _ °C                                                 |
| 임상적으로 유의한 비정상 소견이 있습니까?                                    | <input type="radio"/> 예<br><input type="radio"/> 아니오 |
| 동역서 취득 이후 임상적으로 유의한 비정상 소견이 있을 경우, 비정상 소견은 '이상반응'에 기록하십시오. |                                                      |

| 신체계측       |                             |
|------------|-----------------------------|
| ND         | <input type="checkbox"/> ND |
| 미실시인 경우 사유 | _____<br>_____<br>_____     |
| 측정일        | _____                       |
| 체중         | _ kg                        |

|      |             |      |               |
|------|-------------|------|---------------|
| EOT  | PROTOCOL    | SITE | SCREENING NO. |
| 신체검진 | PHI-101-002 |      |               |
| 전자서명 |             |      |               |

### 신체검진

|                                                |                                                                                             |
|------------------------------------------------|---------------------------------------------------------------------------------------------|
| ND                                             | <input type="checkbox"/> ND                                                                 |
| 미실시인 경우 사유                                     | _____<br>_____<br>_____                                                                     |
| 검진일                                            | _____                                                                                       |
| 지난 방문과 비교하였을 때, 각 신체기관 검진 결과 새로운 비정상 소견이 있습니까? | <input type="radio"/> 예 → <u>아래 표에 신체기관 및 상세내용을 기재하여 주십시오.</u><br><input type="radio"/> 아니오 |

동의서 취득 이후 임상적으로 유의한 비정상 소견이 있을 경우, 비정상 소견은 '이상반응'에 기록하십시오.

| No | 신체기관   | 임상적 유의성                                           |
|----|--------|---------------------------------------------------|
| 1  | _____▼ | <input type="radio"/> 예 <input type="radio"/> 아니오 |

|         |                                                            |
|---------|------------------------------------------------------------|
| 신체기관    | 외관, 피부, 두/경부, 흉부/폐, 심장, 복부, 비뇨/생식계, 사지, 근골격계, 신경계, 림프절, 기타 |
| 신체기관_기타 | _____<br>_____<br>_____                                    |



|         |             |      |               |
|---------|-------------|------|---------------|
| EOT     | PROTOCOL    | SITE | SCREENING NO. |
| ECOG PS | PHI-101-002 |      |               |
| 전자서명    |             |      |               |

| ECOG PS    |                                                                                                                                                                                                    |
|------------|----------------------------------------------------------------------------------------------------------------------------------------------------------------------------------------------------|
| ND         | <input type="checkbox"/> ND                                                                                                                                                                        |
| 미실시인 경우 사유 | <hr/> <hr/> <hr/>                                                                                                                                                                                  |
| 평가일        | _____                                                                                                                                                                                              |
| ECOG PS    | <input type="radio"/> Grade 0<br><input type="radio"/> Grade 1<br><input type="radio"/> Grade 2<br><input type="radio"/> Grade 3<br><input type="radio"/> Grade 4<br><input type="radio"/> Grade 5 |

| EOT  | PROTOCOL    | SITE | SCREENING NO. |
|------|-------------|------|---------------|
| 임신검사 | PHI-101-002 |      |               |
| 전자서명 |             |      |               |

| 임신검사                     |                                                                    |
|--------------------------|--------------------------------------------------------------------|
| ND                       | <input type="checkbox"/> ND                                        |
| 미실시인 경우 사유               | _____<br>_____<br>_____                                            |
| 검사일                      | _____                                                              |
| 검사 방법                    | <input type="radio"/> urine-hCG<br><input type="radio"/> serum-hCG |
| 검사결과                     | <input type="radio"/> 양성<br><input type="radio"/> 음성               |
| serum-hCG 검사 방법으로 실시합니다. |                                                                    |

|        |             |      |               |
|--------|-------------|------|---------------|
| EOT    | PROTOCOL    | SITE | SCREENING NO. |
| 실험실 검사 | PHI-101-002 |      |               |
| 전자서명   |             |      |               |

| 실험실 검사                                                                                                                                 |                                                      |
|----------------------------------------------------------------------------------------------------------------------------------------|------------------------------------------------------|
| ND                                                                                                                                     | <input type="checkbox"/> ND                          |
| 미실시인 경우 사유                                                                                                                             | _____<br>_____<br>_____                              |
| 최소 8시간 금식 여부                                                                                                                           | <input type="radio"/> 예<br><input type="radio"/> 아니오 |
| 검체 채취일                                                                                                                                 | _____                                                |
| <p>* 동의서 취득 이후 검사 결과가 'Clinical Significance' 일 경우 비정상 소견은 '이상반응'에 기록하십시오.<br/>* 검사 항목별 단위는 "정상 참고 범위"와 함께 제공되므로 아래 결과에 기록하지 않습니다.</p> |                                                      |

| Hematology  |                             |                                                    |                                                   |
|-------------|-----------------------------|----------------------------------------------------|---------------------------------------------------|
| ND          | <input type="checkbox"/> ND |                                                    |                                                   |
| 검사항목        | 결과                          | 정상 여부                                              | 임상적 유의성                                           |
| WBC         | _____                       | <input type="radio"/> 정상 <input type="radio"/> 비정상 | <input type="radio"/> 예 <input type="radio"/> 아니오 |
| RBC         | _____                       | <input type="radio"/> 정상 <input type="radio"/> 비정상 | <input type="radio"/> 예 <input type="radio"/> 아니오 |
| Hemoglobin  | _____                       | <input type="radio"/> 정상 <input type="radio"/> 비정상 | <input type="radio"/> 예 <input type="radio"/> 아니오 |
| Hematocrit  | _____                       | <input type="radio"/> 정상 <input type="radio"/> 비정상 | <input type="radio"/> 예 <input type="radio"/> 아니오 |
| Platelet    | _____                       | <input type="radio"/> 정상 <input type="radio"/> 비정상 | <input type="radio"/> 예 <input type="radio"/> 아니오 |
| MCV         | _____                       | <input type="radio"/> 정상 <input type="radio"/> 비정상 | <input type="radio"/> 예 <input type="radio"/> 아니오 |
| MCH         | _____                       | <input type="radio"/> 정상 <input type="radio"/> 비정상 | <input type="radio"/> 예 <input type="radio"/> 아니오 |
| MCHC        | _____                       | <input type="radio"/> 정상 <input type="radio"/> 비정상 | <input type="radio"/> 예 <input type="radio"/> 아니오 |
| Neutrophils | _____                       | <input type="radio"/> 정상 <input type="radio"/> 비정상 | <input type="radio"/> 예 <input type="radio"/> 아니오 |

|        |             |      |               |
|--------|-------------|------|---------------|
| EOT    | PROTOCOL    | SITE | SCREENING NO. |
| 실험실 검사 | PHI-101-002 |      |               |
| 전자서명   |             |      |               |

| 검사항목        | 결과    | 정상 여부                                              | 임상적 유의성                                           |
|-------------|-------|----------------------------------------------------|---------------------------------------------------|
| Lymphocytes | _____ | <input type="radio"/> 정상 <input type="radio"/> 비정상 | <input type="radio"/> 예 <input type="radio"/> 아니오 |
| Monocytes   | _____ | <input type="radio"/> 정상 <input type="radio"/> 비정상 | <input type="radio"/> 예 <input type="radio"/> 아니오 |
| Eosinophils | _____ | <input type="radio"/> 정상 <input type="radio"/> 비정상 | <input type="radio"/> 예 <input type="radio"/> 아니오 |
| Basophils   | _____ | <input type="radio"/> 정상 <input type="radio"/> 비정상 | <input type="radio"/> 예 <input type="radio"/> 아니오 |
| ANC         | _____ | <input type="radio"/> 정상 <input type="radio"/> 비정상 | <input type="radio"/> 예 <input type="radio"/> 아니오 |

| Chemistry       |                             |                                                    |                                                   |
|-----------------|-----------------------------|----------------------------------------------------|---------------------------------------------------|
| ND              | <input type="checkbox"/> ND |                                                    |                                                   |
| 검사항목            | 결과                          | 정상 여부                                              | 임상적 유의성                                           |
| BUN             | _____                       | <input type="radio"/> 정상 <input type="radio"/> 비정상 | <input type="radio"/> 예 <input type="radio"/> 아니오 |
| Creatinine      | _____                       | <input type="radio"/> 정상 <input type="radio"/> 비정상 | <input type="radio"/> 예 <input type="radio"/> 아니오 |
| Total bilirubin | _____                       | <input type="radio"/> 정상 <input type="radio"/> 비정상 | <input type="radio"/> 예 <input type="radio"/> 아니오 |
| AST             | _____                       | <input type="radio"/> 정상 <input type="radio"/> 비정상 | <input type="radio"/> 예 <input type="radio"/> 아니오 |
| ALT             | _____                       | <input type="radio"/> 정상 <input type="radio"/> 비정상 | <input type="radio"/> 예 <input type="radio"/> 아니오 |
| ALP             | _____                       | <input type="radio"/> 정상 <input type="radio"/> 비정상 | <input type="radio"/> 예 <input type="radio"/> 아니오 |
| γGT             | _____                       | <input type="radio"/> 정상 <input type="radio"/> 비정상 | <input type="radio"/> 예 <input type="radio"/> 아니오 |
| LDH             | _____                       | <input type="radio"/> 정상 <input type="radio"/> 비정상 | <input type="radio"/> 예 <input type="radio"/> 아니오 |
| Total protein   | _____                       | <input type="radio"/> 정상 <input type="radio"/> 비정상 | <input type="radio"/> 예 <input type="radio"/> 아니오 |
| Albumin         | _____                       | <input type="radio"/> 정상 <input type="radio"/> 비정상 | <input type="radio"/> 예 <input type="radio"/> 아니오 |
| Globulin[자동계산]  | _____                       | <input type="radio"/> 정상 <input type="radio"/> 비정상 | <input type="radio"/> 예 <input type="radio"/> 아니오 |

|        |             |      |               |
|--------|-------------|------|---------------|
| EOT    | PROTOCOL    | SITE | SCREENING NO. |
| 실험실 검사 | PHI-101-002 |      |               |
| 전자서명   |             |      |               |

| 검사항목              | 결과    | 정상 여부                                              | 임상적 유의성                                           |
|-------------------|-------|----------------------------------------------------|---------------------------------------------------|
| Ca                | _____ | <input type="radio"/> 정상 <input type="radio"/> 비정상 | <input type="radio"/> 예 <input type="radio"/> 아니오 |
| Mg                | _____ | <input type="radio"/> 정상 <input type="radio"/> 비정상 | <input type="radio"/> 예 <input type="radio"/> 아니오 |
| Na                | _____ | <input type="radio"/> 정상 <input type="radio"/> 비정상 | <input type="radio"/> 예 <input type="radio"/> 아니오 |
| K                 | _____ | <input type="radio"/> 정상 <input type="radio"/> 비정상 | <input type="radio"/> 예 <input type="radio"/> 아니오 |
| Cl                | _____ | <input type="radio"/> 정상 <input type="radio"/> 비정상 | <input type="radio"/> 예 <input type="radio"/> 아니오 |
| P                 | _____ | <input type="radio"/> 정상 <input type="radio"/> 비정상 | <input type="radio"/> 예 <input type="radio"/> 아니오 |
| Total cholesterol | _____ | <input type="radio"/> 정상 <input type="radio"/> 비정상 | <input type="radio"/> 예 <input type="radio"/> 아니오 |
| Triglyceride      | _____ | <input type="radio"/> 정상 <input type="radio"/> 비정상 | <input type="radio"/> 예 <input type="radio"/> 아니오 |
| CPK               | _____ | <input type="radio"/> 정상 <input type="radio"/> 비정상 | <input type="radio"/> 예 <input type="radio"/> 아니오 |
| Glucose           | _____ | <input type="radio"/> 정상 <input type="radio"/> 비정상 | <input type="radio"/> 예 <input type="radio"/> 아니오 |
| CrCl[자동계산]        | _____ |                                                    |                                                   |

| Urinalysis       |                             |                                                    |                                                   |
|------------------|-----------------------------|----------------------------------------------------|---------------------------------------------------|
| ND               | <input type="checkbox"/> ND |                                                    |                                                   |
| 검사항목             | 결과                          | 정상 여부                                              | 임상적 유의성                                           |
| Specific gravity | _____                       | <input type="radio"/> 정상 <input type="radio"/> 비정상 | <input type="radio"/> 예 <input type="radio"/> 아니오 |
| pH               | _____                       | <input type="radio"/> 정상 <input type="radio"/> 비정상 | <input type="radio"/> 예 <input type="radio"/> 아니오 |
| Bilirubin[U]     | _____                       | <input type="radio"/> 정상 <input type="radio"/> 비정상 | <input type="radio"/> 예 <input type="radio"/> 아니오 |
| Urobilinogen[U]  | _____                       | <input type="radio"/> 정상 <input type="radio"/> 비정상 | <input type="radio"/> 예 <input type="radio"/> 아니오 |
| Blood[U]         | _____                       | <input type="radio"/> 정상 <input type="radio"/> 비정상 | <input type="radio"/> 예 <input type="radio"/> 아니오 |

|        |             |      |               |
|--------|-------------|------|---------------|
| EOT    | PROTOCOL    | SITE | SCREENING NO. |
| 실험실 검사 | PHI-101-002 |      |               |
| 전자서명   |             |      |               |

| 검사항목                | 결과    | 정상 여부                                              | 임상적 유의성                                           |
|---------------------|-------|----------------------------------------------------|---------------------------------------------------|
| Glucose[U]          | _____ | <input type="radio"/> 정상 <input type="radio"/> 비정상 | <input type="radio"/> 예 <input type="radio"/> 아니오 |
| Protein[U] (Alb[U]) | _____ | <input type="radio"/> 정상 <input type="radio"/> 비정상 | <input type="radio"/> 예 <input type="radio"/> 아니오 |
| Ketones[U]          | _____ | <input type="radio"/> 정상 <input type="radio"/> 비정상 | <input type="radio"/> 예 <input type="radio"/> 아니오 |
| Leukocytes[U]       | _____ | <input type="radio"/> 정상 <input type="radio"/> 비정상 | <input type="radio"/> 예 <input type="radio"/> 아니오 |

| Thyroid Function Tests |                             |                                                    |                                                   |
|------------------------|-----------------------------|----------------------------------------------------|---------------------------------------------------|
| ND                     | <input type="checkbox"/> ND |                                                    |                                                   |
| 검사항목                   | 결과                          | 정상 여부                                              | 임상적 유의성                                           |
| TSH                    | _____                       | <input type="radio"/> 정상 <input type="radio"/> 비정상 | <input type="radio"/> 예 <input type="radio"/> 아니오 |
| Free T4                | _____                       | <input type="radio"/> 정상 <input type="radio"/> 비정상 | <input type="radio"/> 예 <input type="radio"/> 아니오 |

| Tests for HbA1c |                             |                                                    |                                                   |
|-----------------|-----------------------------|----------------------------------------------------|---------------------------------------------------|
| ND              | <input type="checkbox"/> ND |                                                    |                                                   |
| 검사항목            | 결과                          | 정상 여부                                              | 임상적 유의성                                           |
| HbA1c           | _____                       | <input type="radio"/> 정상 <input type="radio"/> 비정상 | <input type="radio"/> 예 <input type="radio"/> 아니오 |

| Coagulation Profile |                             |                                                    |                                                   |
|---------------------|-----------------------------|----------------------------------------------------|---------------------------------------------------|
| ND                  | <input type="checkbox"/> ND |                                                    |                                                   |
| 검사항목                | 결과                          | 정상 여부                                              | 임상적 유의성                                           |
| PT INR              | _____                       | <input type="radio"/> 정상 <input type="radio"/> 비정상 | <input type="radio"/> 예 <input type="radio"/> 아니오 |
| aPTT                | _____                       | <input type="radio"/> 정상 <input type="radio"/> 비정상 | <input type="radio"/> 예 <input type="radio"/> 아니오 |

|             |             |      |               |
|-------------|-------------|------|---------------|
| EOT         | PROTOCOL    | SITE | SCREENING NO. |
| 12-Lead ECG | PHI-101-002 |      |               |
| 전자서명        |             |      |               |

| 12-Lead ECG                                                                                                                                                                                                                                      |            |                                                      |              |             |              |              |
|--------------------------------------------------------------------------------------------------------------------------------------------------------------------------------------------------------------------------------------------------|------------|------------------------------------------------------|--------------|-------------|--------------|--------------|
| ND                                                                                                                                                                                                                                               |            | <input type="checkbox"/> ND                          |              |             |              |              |
| 미실시인 경우 사유                                                                                                                                                                                                                                       |            | _____                                                |              |             |              |              |
| 검사일                                                                                                                                                                                                                                              |            | _____                                                |              |             |              |              |
| 측정횟수                                                                                                                                                                                                                                             |            | <input type="radio"/> 1회<br><input type="radio"/> 3회 |              |             |              |              |
| BBB 여부                                                                                                                                                                                                                                           |            | <input type="radio"/> 예<br><input type="radio"/> 아니오 |              |             |              |              |
| No.                                                                                                                                                                                                                                              | Heart Rate | PR Interval                                          | QRS Duration | QT Interval | QTcB [자동 계산] | QTcF [자동 계산] |
| 1차                                                                                                                                                                                                                                               | __ bpm     | __ msec                                              | __ msec      | __ msec     | __           | __           |
| 2차                                                                                                                                                                                                                                               | __ bpm     | __ msec                                              | __ msec      | __ msec     | __           | __           |
| 3차                                                                                                                                                                                                                                               | __ bpm     | __ msec                                              | __ msec      | __ msec     | __           | __           |
| QTcB 평균[자동계산]                                                                                                                                                                                                                                    |            | __                                                   |              |             |              |              |
| QTcF 평균[자동계산]                                                                                                                                                                                                                                    |            | __                                                   |              |             |              |              |
| 임상적으로 유의한 비정상 소견이 있습니까?                                                                                                                                                                                                                          |            | <input type="radio"/> 예<br><input type="radio"/> 아니오 |              |             |              |              |
| <p>* 동의서 취득 이후 임상적으로 유의한 비정상 소견이 있을 경우, 비정상 소견은 '이상반응'에 기록하십시오.<br/>           * Screen, C1D1 시점에서는 3회 측정하고, 이후 주기에서는 1회만 수행합니다.<br/>           (단, ECG를 통해 QT 간격 연장이 입증된 경우, 단기간(즉시)에 추가로 2개의 ECG를 수행하여 최종 3개 ECG의 평균 QTc interval을 확인합니다.)</p> |            |                                                      |              |             |              |              |

| EOT               | PROTOCOL    | SITE | SCREENING NO. |
|-------------------|-------------|------|---------------|
| ECHO 또는 MUGA scan | PHI-101-002 |      |               |
| 전자서명              |             |      |               |

| ECHO 또는 MUGA scan                                            |                                                               |
|--------------------------------------------------------------|---------------------------------------------------------------|
| ND                                                           | <input type="checkbox"/> ND                                   |
| 미실시인 경우 사유                                                   | _____<br>_____<br>_____                                       |
| 검사일                                                          | _____                                                         |
| 검사 방법                                                        | <input type="radio"/> ECHO<br><input type="radio"/> MUGA scan |
| 좌심실구출률(LVEF)                                                 | ___ %                                                         |
| 임상적으로 유의한 비정상 소견이 있습니까?                                      | <input type="radio"/> 예<br><input type="radio"/> 아니오          |
| * 동의서 취득 이후 임상적으로 유의한 비정상 소견이 있을 경우, 비정상 소견은 '이상반응'에 기록하십시오. |                                                               |



|       |             |      |               |
|-------|-------------|------|---------------|
| EOT   | PROTOCOL    | SITE | SCREENING NO. |
| PK 채혈 | PHI-101-002 |      |               |
| 전자서명  |             |      |               |

| PK 채혈        |                             |       |
|--------------|-----------------------------|-------|
| ND           | <input type="checkbox"/> ND |       |
| 미실시인 경우 사유   | <hr/> <hr/> <hr/>           |       |
| PHI-101 투약일  | _____                       |       |
| PHI-101 투약시간 | _____                       |       |
| No           | 채혈일                         | 채혈 시간 |
| 1            | _____                       | _____ |

| EOT       | PROTOCOL    | SITE | SCREENING NO. |
|-----------|-------------|------|---------------|
| 임상시험 투여종료 | PHI-101-002 |      |               |
| 전자서명      |             |      |               |

| 임상시험 투여종료                          |                                                                                                                                                                                                                                                                                                                                                                                                                                                                                                               |
|------------------------------------|---------------------------------------------------------------------------------------------------------------------------------------------------------------------------------------------------------------------------------------------------------------------------------------------------------------------------------------------------------------------------------------------------------------------------------------------------------------------------------------------------------------|
| 시험대상자의 투여종료 시점                     | <ul style="list-style-type: none"> <li>○ DLT 관찰기간(1주기)완료 전 DLT발생 없이 투여종료</li> <li>○ DLT발생 또는 DLT 관찰기간(1주기) 이후 종료</li> </ul>                                                                                                                                                                                                                                                                                                                                                                                   |
| 종료/중단일                             | _____                                                                                                                                                                                                                                                                                                                                                                                                                                                                                                         |
| DLT 관찰기간(1주기)완료 전 DLT발생 없이 투여종료 사유 | <ul style="list-style-type: none"> <li>○ 영상학적 질병진행(radiographic progression)이 확인되거나 시험자가 치료 효과부족(clinical progression)으로 판단한 경우</li> <li>○ 대상자의 사망</li> <li>○ 대상자 또는 대상자 대리인의 동의철회</li> <li>○ 이상반응으로 임상시험 지속 곤란 (DLT제외) → 상세 내용 기재</li> <li>○ 중대한 임상시험 계획서 위반 → 상세 내용 기재</li> <li>○ 대상자가 지속적인 치료나 정규 방문에서 시행되는 검사 및 절차를 수행할 수 없는 상태나 다른 질환이 발견된 경우 → 상세 내용 기재</li> <li>○ 추적관찰 실패</li> <li>○ 기타 → 상세 내용 기재</li> </ul>                                                                                          |
| DLT발생 또는 DLT 관찰기간 (1주기) 이후 종료 사유   | <ul style="list-style-type: none"> <li>○ DLT 발생</li> <li>○ 전체 임상시험 종료</li> <li>○ PHI-101의 일시중단 기간이 4주 초과 또는 투여중지 2회 초과</li> <li>○ 영상학적 질병진행(radiographic progression)이 확인되거나 시험자가 치료 효과부족(clinical progression)으로 판단한 경우</li> <li>○ 대상자의 사망</li> <li>○ 대상자 또는 대상자 대리인의 동의철회</li> <li>○ 이상반응으로 임상시험 지속 곤란 (DLT제외) → 상세 내용 기재</li> <li>○ 중대한 임상시험 계획서 위반 → 상세 내용 기재</li> <li>○ 대상자가 지속적인 치료나 정규 방문에서 시행되는 검사 및 절차를 수행할 수 없는 상태나 다른 질환이 발견된 경우 → 상세 내용 기재</li> <li>○ 추적관찰 실패</li> <li>○ 기타 → 상세 내용 기재</li> </ul> |
| 상세 내용                              | <hr/> <hr/> <hr/>                                                                                                                                                                                                                                                                                                                                                                                                                                                                                             |

|      |             |      |               |
|------|-------------|------|---------------|
| USV1 | PROTOCOL    | SITE | SCREENING NO. |
| 방문일  | PHI-101-002 |      |               |
| 전자서명 |             |      |               |

| 방문일         |                                                        |
|-------------|--------------------------------------------------------|
| 방문일         | _____                                                  |
| 방문사유        | <input type="radio"/> 이상반응<br><input type="radio"/> 기타 |
| 방문사유, 기타 상세 | <hr/> <hr/> <hr/>                                      |

| 선행/병용약물 확인                                                                       |
|----------------------------------------------------------------------------------|
| <p>지난 방문과 비교하였을 때, 새롭게 투여되었거나 투여 용량이 변경된 병용약물이 있는 경우 선행/병용약물 페이지에 기록하여 주십시오.</p> |

| 이상반응 확인                                                                                                                 |
|-------------------------------------------------------------------------------------------------------------------------|
| <p>지난 방문과 비교하였을 때, 새롭게 발생한 이상반응이 있을 경우 이상반응 페이지에 기록하여 주십시오. (만약, EOT방문 전 새로운 항암요법이 수행되는 경우에는 해당 시점까지만 이상반응을 수집합니다.)</p> |

| USV1       | PROTOCOL    | SITE | SCREENING NO. |
|------------|-------------|------|---------------|
| 활력징후, 신체계측 | PHI-101-002 |      |               |
| 전자서명       |             |      |               |

| 활력징후                                                       |                                                      |
|------------------------------------------------------------|------------------------------------------------------|
| ND                                                         | <input type="checkbox"/> ND                          |
| 미 실시인 경우 사유                                                | _____<br>_____<br>_____                              |
| 5분 이상 안정을 취한 후 앉은 자세(좌위)에서 측정합니다.                          |                                                      |
| 측정일                                                        | _____                                                |
| 수축기 혈압                                                     | _ mmHg                                               |
| 이완기 혈압                                                     | _ mmHg                                               |
| 맥박                                                         | _ 회/분                                                |
| 호흡수                                                        | _ 회/분                                                |
| 체온                                                         | _ °C                                                 |
| 임상적으로 유의한 비정상 소견이 있습니까?                                    | <input type="radio"/> 예<br><input type="radio"/> 아니오 |
| 동역서 취득 이후 임상적으로 유의한 비정상 소견이 있을 경우, 비정상 소견은 '이상반응'에 기록하십시오. |                                                      |

| 신체계측        |                             |
|-------------|-----------------------------|
| ND          | <input type="checkbox"/> ND |
| 미 실시인 경우 사유 | _____<br>_____<br>_____     |
| 측정일         | _____                       |
| 체중          | _ kg                        |

|      |             |      |               |
|------|-------------|------|---------------|
| USV1 | PROTOCOL    | SITE | SCREENING NO. |
| 신체검진 | PHI-101-002 |      |               |
| 전자서명 |             |      |               |

### 신체검진

|                                                |                                                                                             |
|------------------------------------------------|---------------------------------------------------------------------------------------------|
| ND                                             | <input type="checkbox"/> ND                                                                 |
| 미실시인 경우 사유                                     | _____<br>_____<br>_____                                                                     |
| 검진일                                            | _____                                                                                       |
| 지난 방문과 비교하였을 때, 각 신체기관 검진 결과 새로운 비정상 소견이 있습니까? | <input type="radio"/> 예 → <u>아래 표에 신체기관 및 상세내용을 기재하여 주십시오.</u><br><input type="radio"/> 아니오 |

동의서 취득 이후 임상적으로 유의한 비정상 소견이 있을 경우, 비정상 소견은 '이상반응'에 기록하십시오.

| No | 신체기관 | 임상적 유의성                                           |
|----|------|---------------------------------------------------|
| 1  | —▼   | <input type="radio"/> 예 <input type="radio"/> 아니오 |

|         |                                                            |
|---------|------------------------------------------------------------|
| 신체기관    | 외관, 피부, 두/경부, 흉부/폐, 심장, 복부, 비뇨/생식계, 사지, 근골격계, 신경계, 림프절, 기타 |
| 신체기관_기타 | _____<br>_____<br>_____                                    |

|         |             |      |               |
|---------|-------------|------|---------------|
| USV1    | PROTOCOL    | SITE | SCREENING NO. |
| ECOG PS | PHI-101-002 |      |               |
| 전자서명    |             |      |               |

| ECOG PS    |                                                                                                                                                                                                    |
|------------|----------------------------------------------------------------------------------------------------------------------------------------------------------------------------------------------------|
| ND         | <input type="checkbox"/> ND                                                                                                                                                                        |
| 미실시인 경우 사유 | <hr/> <hr/> <hr/>                                                                                                                                                                                  |
| 평가일        | _____                                                                                                                                                                                              |
| ECOG PS    | <input type="radio"/> Grade 0<br><input type="radio"/> Grade 1<br><input type="radio"/> Grade 2<br><input type="radio"/> Grade 3<br><input type="radio"/> Grade 4<br><input type="radio"/> Grade 5 |

|      |             |      |               |
|------|-------------|------|---------------|
| USV1 | PROTOCOL    | SITE | SCREENING NO. |
| 임신검사 | PHI-101-002 |      |               |
| 전자서명 |             |      |               |

| 임신검사                                 |                                                                    |
|--------------------------------------|--------------------------------------------------------------------|
| ND                                   | <input type="checkbox"/> ND                                        |
| 미실시인 경우 사유                           | _____<br>_____<br>_____                                            |
| 검사일                                  | _____                                                              |
| 검사 방법                                | <input type="radio"/> urine-hCG<br><input type="radio"/> serum-hCG |
| 검사결과                                 | <input type="radio"/> 양성<br><input type="radio"/> 음성               |
| urine-hCG(및/또는 serum hCG) 검사를 실시합니다. |                                                                    |

|        |             |      |               |
|--------|-------------|------|---------------|
| USV1   | PROTOCOL    | SITE | SCREENING NO. |
| 실험실 검사 | PHI-101-002 |      |               |
| 전자서명   |             |      |               |

| 실험실 검사                                                                                                                                 |                                                      |
|----------------------------------------------------------------------------------------------------------------------------------------|------------------------------------------------------|
| ND                                                                                                                                     | <input type="checkbox"/> ND                          |
| 미실시인 경우 사유                                                                                                                             | _____<br>_____<br>_____                              |
| 최소 8시간 금식 여부                                                                                                                           | <input type="radio"/> 예<br><input type="radio"/> 아니오 |
| 검체 채취일                                                                                                                                 | _____                                                |
| <p>* 동의서 취득 이후 검사 결과가 'Clinical Significance' 일 경우 비정상 소견은 '이상반응'에 기록하십시오.<br/>* 검사 항목별 단위는 "정상 참고 범위"와 함께 제공되므로 아래 결과에 기록하지 않습니다.</p> |                                                      |

| Hematology  |                             |                                                    |                                                   |
|-------------|-----------------------------|----------------------------------------------------|---------------------------------------------------|
| ND          | <input type="checkbox"/> ND |                                                    |                                                   |
| 검사항목        | 결과                          | 정상 여부                                              | 임상적 유의성                                           |
| WBC         | _____                       | <input type="radio"/> 정상 <input type="radio"/> 비정상 | <input type="radio"/> 예 <input type="radio"/> 아니오 |
| RBC         | _____                       | <input type="radio"/> 정상 <input type="radio"/> 비정상 | <input type="radio"/> 예 <input type="radio"/> 아니오 |
| Hemoglobin  | _____                       | <input type="radio"/> 정상 <input type="radio"/> 비정상 | <input type="radio"/> 예 <input type="radio"/> 아니오 |
| Hematocrit  | _____                       | <input type="radio"/> 정상 <input type="radio"/> 비정상 | <input type="radio"/> 예 <input type="radio"/> 아니오 |
| Platelet    | _____                       | <input type="radio"/> 정상 <input type="radio"/> 비정상 | <input type="radio"/> 예 <input type="radio"/> 아니오 |
| MCV         | _____                       | <input type="radio"/> 정상 <input type="radio"/> 비정상 | <input type="radio"/> 예 <input type="radio"/> 아니오 |
| MCH         | _____                       | <input type="radio"/> 정상 <input type="radio"/> 비정상 | <input type="radio"/> 예 <input type="radio"/> 아니오 |
| MCHC        | _____                       | <input type="radio"/> 정상 <input type="radio"/> 비정상 | <input type="radio"/> 예 <input type="radio"/> 아니오 |
| Neutrophils | _____                       | <input type="radio"/> 정상 <input type="radio"/> 비정상 | <input type="radio"/> 예 <input type="radio"/> 아니오 |



|        |             |      |               |
|--------|-------------|------|---------------|
| USV1   | PROTOCOL    | SITE | SCREENING NO. |
| 실험실 검사 | PHI-101-002 |      |               |
| 전자서명   |             |      |               |

| 검사항목        | 결과    | 정상 여부                                              | 임상적 유의성                                           |
|-------------|-------|----------------------------------------------------|---------------------------------------------------|
| Lymphocytes | _____ | <input type="radio"/> 정상 <input type="radio"/> 비정상 | <input type="radio"/> 예 <input type="radio"/> 아니오 |
| Monocytes   | _____ | <input type="radio"/> 정상 <input type="radio"/> 비정상 | <input type="radio"/> 예 <input type="radio"/> 아니오 |
| Eosinophils | _____ | <input type="radio"/> 정상 <input type="radio"/> 비정상 | <input type="radio"/> 예 <input type="radio"/> 아니오 |
| Basophils   | _____ | <input type="radio"/> 정상 <input type="radio"/> 비정상 | <input type="radio"/> 예 <input type="radio"/> 아니오 |
| ANC         | _____ | <input type="radio"/> 정상 <input type="radio"/> 비정상 | <input type="radio"/> 예 <input type="radio"/> 아니오 |

| Chemistry       |                             |                                                    |                                                   |
|-----------------|-----------------------------|----------------------------------------------------|---------------------------------------------------|
| ND              | <input type="checkbox"/> ND |                                                    |                                                   |
| 검사항목            | 결과                          | 정상 여부                                              | 임상적 유의성                                           |
| BUN             | _____                       | <input type="radio"/> 정상 <input type="radio"/> 비정상 | <input type="radio"/> 예 <input type="radio"/> 아니오 |
| Creatinine      | _____                       | <input type="radio"/> 정상 <input type="radio"/> 비정상 | <input type="radio"/> 예 <input type="radio"/> 아니오 |
| Total bilirubin | _____                       | <input type="radio"/> 정상 <input type="radio"/> 비정상 | <input type="radio"/> 예 <input type="radio"/> 아니오 |
| AST             | _____                       | <input type="radio"/> 정상 <input type="radio"/> 비정상 | <input type="radio"/> 예 <input type="radio"/> 아니오 |
| ALT             | _____                       | <input type="radio"/> 정상 <input type="radio"/> 비정상 | <input type="radio"/> 예 <input type="radio"/> 아니오 |
| ALP             | _____                       | <input type="radio"/> 정상 <input type="radio"/> 비정상 | <input type="radio"/> 예 <input type="radio"/> 아니오 |
| γGT             | _____                       | <input type="radio"/> 정상 <input type="radio"/> 비정상 | <input type="radio"/> 예 <input type="radio"/> 아니오 |
| LDH             | _____                       | <input type="radio"/> 정상 <input type="radio"/> 비정상 | <input type="radio"/> 예 <input type="radio"/> 아니오 |
| Total protein   | _____                       | <input type="radio"/> 정상 <input type="radio"/> 비정상 | <input type="radio"/> 예 <input type="radio"/> 아니오 |
| Albumin         | _____                       | <input type="radio"/> 정상 <input type="radio"/> 비정상 | <input type="radio"/> 예 <input type="radio"/> 아니오 |
| Globulin[자동계산]  | _____                       | <input type="radio"/> 정상 <input type="radio"/> 비정상 | <input type="radio"/> 예 <input type="radio"/> 아니오 |

|        |             |      |               |
|--------|-------------|------|---------------|
| USV1   | PROTOCOL    | SITE | SCREENING NO. |
| 실험실 검사 | PHI-101-002 |      |               |
| 전자서명   |             |      |               |

| 검사항목              | 결과    | 정상 여부                                              | 임상적 유의성                                           |
|-------------------|-------|----------------------------------------------------|---------------------------------------------------|
| Ca                | _____ | <input type="radio"/> 정상 <input type="radio"/> 비정상 | <input type="radio"/> 예 <input type="radio"/> 아니오 |
| Mg                | _____ | <input type="radio"/> 정상 <input type="radio"/> 비정상 | <input type="radio"/> 예 <input type="radio"/> 아니오 |
| Na                | _____ | <input type="radio"/> 정상 <input type="radio"/> 비정상 | <input type="radio"/> 예 <input type="radio"/> 아니오 |
| K                 | _____ | <input type="radio"/> 정상 <input type="radio"/> 비정상 | <input type="radio"/> 예 <input type="radio"/> 아니오 |
| Cl                | _____ | <input type="radio"/> 정상 <input type="radio"/> 비정상 | <input type="radio"/> 예 <input type="radio"/> 아니오 |
| P                 | _____ | <input type="radio"/> 정상 <input type="radio"/> 비정상 | <input type="radio"/> 예 <input type="radio"/> 아니오 |
| Total cholesterol | _____ | <input type="radio"/> 정상 <input type="radio"/> 비정상 | <input type="radio"/> 예 <input type="radio"/> 아니오 |
| Triglyceride      | _____ | <input type="radio"/> 정상 <input type="radio"/> 비정상 | <input type="radio"/> 예 <input type="radio"/> 아니오 |
| CPK               | _____ | <input type="radio"/> 정상 <input type="radio"/> 비정상 | <input type="radio"/> 예 <input type="radio"/> 아니오 |
| Glucose           | _____ | <input type="radio"/> 정상 <input type="radio"/> 비정상 | <input type="radio"/> 예 <input type="radio"/> 아니오 |
| CrCl[자동계산]        | _____ |                                                    |                                                   |

| Urinalysis       |                             |                                                    |                                                   |
|------------------|-----------------------------|----------------------------------------------------|---------------------------------------------------|
| ND               | <input type="checkbox"/> ND |                                                    |                                                   |
| 검사항목             | 결과                          | 정상 여부                                              | 임상적 유의성                                           |
| Specific gravity | _____                       | <input type="radio"/> 정상 <input type="radio"/> 비정상 | <input type="radio"/> 예 <input type="radio"/> 아니오 |
| pH               | _____                       | <input type="radio"/> 정상 <input type="radio"/> 비정상 | <input type="radio"/> 예 <input type="radio"/> 아니오 |
| Bilirubin[U]     | _____                       | <input type="radio"/> 정상 <input type="radio"/> 비정상 | <input type="radio"/> 예 <input type="radio"/> 아니오 |
| Urobilinogen[U]  | _____                       | <input type="radio"/> 정상 <input type="radio"/> 비정상 | <input type="radio"/> 예 <input type="radio"/> 아니오 |
| Blood[U]         | _____                       | <input type="radio"/> 정상 <input type="radio"/> 비정상 | <input type="radio"/> 예 <input type="radio"/> 아니오 |

|        |             |      |               |
|--------|-------------|------|---------------|
| USV1   | PROTOCOL    | SITE | SCREENING NO. |
| 실험실 검사 | PHI-101-002 |      |               |
| 전자서명   |             |      |               |

| 검사항목                | 결과    | 정상 여부                                              | 임상적 유의성                                           |
|---------------------|-------|----------------------------------------------------|---------------------------------------------------|
| Glucose[U]          | _____ | <input type="radio"/> 정상 <input type="radio"/> 비정상 | <input type="radio"/> 예 <input type="radio"/> 아니오 |
| Protein[U] (Alb[U]) | _____ | <input type="radio"/> 정상 <input type="radio"/> 비정상 | <input type="radio"/> 예 <input type="radio"/> 아니오 |
| Ketones[U]          | _____ | <input type="radio"/> 정상 <input type="radio"/> 비정상 | <input type="radio"/> 예 <input type="radio"/> 아니오 |
| Leukocytes[U]       | _____ | <input type="radio"/> 정상 <input type="radio"/> 비정상 | <input type="radio"/> 예 <input type="radio"/> 아니오 |

| Thyroid Function Tests |                             |                                                    |                                                   |
|------------------------|-----------------------------|----------------------------------------------------|---------------------------------------------------|
| ND                     | <input type="checkbox"/> ND |                                                    |                                                   |
| 검사항목                   | 결과                          | 정상 여부                                              | 임상적 유의성                                           |
| TSH                    | _____                       | <input type="radio"/> 정상 <input type="radio"/> 비정상 | <input type="radio"/> 예 <input type="radio"/> 아니오 |
| Free T4                | _____                       | <input type="radio"/> 정상 <input type="radio"/> 비정상 | <input type="radio"/> 예 <input type="radio"/> 아니오 |

| Tests for HbA1c |                             |                                                    |                                                   |
|-----------------|-----------------------------|----------------------------------------------------|---------------------------------------------------|
| ND              | <input type="checkbox"/> ND |                                                    |                                                   |
| 검사항목            | 결과                          | 정상 여부                                              | 임상적 유의성                                           |
| HbA1c           | _____                       | <input type="radio"/> 정상 <input type="radio"/> 비정상 | <input type="radio"/> 예 <input type="radio"/> 아니오 |

| Coagulation Profile |                             |                                                    |                                                   |
|---------------------|-----------------------------|----------------------------------------------------|---------------------------------------------------|
| ND                  | <input type="checkbox"/> ND |                                                    |                                                   |
| 검사항목                | 결과                          | 정상 여부                                              | 임상적 유의성                                           |
| PT INR              | _____                       | <input type="radio"/> 정상 <input type="radio"/> 비정상 | <input type="radio"/> 예 <input type="radio"/> 아니오 |
| aPTT                | _____                       | <input type="radio"/> 정상 <input type="radio"/> 비정상 | <input type="radio"/> 예 <input type="radio"/> 아니오 |

|             |             |      |               |
|-------------|-------------|------|---------------|
| USV1        | PROTOCOL    | SITE | SCREENING NO. |
| 12-Lead ECG | PHI-101-002 |      |               |
| 전자서명        |             |      |               |

| 12-Lead ECG                                                                                                                                                                                                       |            |                                                      |              |             |              |              |
|-------------------------------------------------------------------------------------------------------------------------------------------------------------------------------------------------------------------|------------|------------------------------------------------------|--------------|-------------|--------------|--------------|
| ND                                                                                                                                                                                                                |            | <input type="checkbox"/> ND                          |              |             |              |              |
| 미실시인 경우 사유                                                                                                                                                                                                        |            | _____                                                |              |             |              |              |
| 검사일                                                                                                                                                                                                               |            | _____                                                |              |             |              |              |
| 측정횟수                                                                                                                                                                                                              |            | <input type="radio"/> 1회<br><input type="radio"/> 3회 |              |             |              |              |
| BBB 여부                                                                                                                                                                                                            |            | <input type="radio"/> 예<br><input type="radio"/> 아니오 |              |             |              |              |
| No.                                                                                                                                                                                                               | Heart Rate | PR Interval                                          | QRS Duration | QT Interval | QTcB [자동 계산] | QTcF [자동 계산] |
| 1차                                                                                                                                                                                                                | __ bpm     | __ msec                                              | __ msec      | __ msec     | __           | __           |
| 2차                                                                                                                                                                                                                | __ bpm     | __ msec                                              | __ msec      | __ msec     | __           | __           |
| 3차                                                                                                                                                                                                                | __ bpm     | __ msec                                              | __ msec      | __ msec     | __           | __           |
| QTcB 평균[자동계산]                                                                                                                                                                                                     |            | __                                                   |              |             |              |              |
| QTcF 평균[자동계산]                                                                                                                                                                                                     |            | __                                                   |              |             |              |              |
| 임상적으로 유의한 비정상 소견이 있습니까?                                                                                                                                                                                           |            | <input type="radio"/> 예<br><input type="radio"/> 아니오 |              |             |              |              |
| * 동의서 취득 이후 임상적으로 유의한 비정상 소견이 있을 경우, 비정상 소견은 '이상반응'에 기록하십시오.<br>* Screen, C1D1 시점에서는 3회 측정하고, 이후 주기에서는 1회만 수행합니다.<br>(단, ECG를 통해 QT 간격 연장이 입증된 경우, 단기간(즉시)에 추가로 2개의 ECG를 수행하여 최종 3개 ECG의 평균 QTc interval을 확인합니다.) |            |                                                      |              |             |              |              |

| USV1              | PROTOCOL    | SITE | SCREENING NO. |
|-------------------|-------------|------|---------------|
| ECHO 또는 MUGA scan | PHI-101-002 |      |               |
| 전자서명              |             |      |               |

| ECHO 또는 MUGA scan                                            |                                                               |
|--------------------------------------------------------------|---------------------------------------------------------------|
| ND                                                           | <input type="checkbox"/> ND                                   |
| 미실시인 경우 사유                                                   | _____<br>_____<br>_____                                       |
| 검사일                                                          | _____                                                         |
| 검사 방법                                                        | <input type="radio"/> ECHO<br><input type="radio"/> MUGA scan |
| 좌심실구출률(LVEF)                                                 | ___ %                                                         |
| 임상적으로 유의한 비정상 소견이 있습니까?                                      | <input type="radio"/> 예<br><input type="radio"/> 아니오          |
| * 동의서 취득 이후 임상적으로 유의한 비정상 소견이 있을 경우, 비정상 소견은 '이상반응'에 기록하십시오. |                                                               |

|       |             |      |               |
|-------|-------------|------|---------------|
| FU1-1 | PROTOCOL    | SITE | SCREENING NO. |
| 방문일   | PHI-101-002 |      |               |
| 전자서명  |             |      |               |

|            |                                                            |
|------------|------------------------------------------------------------|
| <b>방문일</b> |                                                            |
| 방문일        | _____                                                      |
| 방문유형       | <input type="radio"/> 기관 방문<br><input type="radio"/> 전화 방문 |

|                                                                           |
|---------------------------------------------------------------------------|
| <b>선행/병용약물 확인</b>                                                         |
| 지난 방문과 비교하였을 때, 새롭게 투여되었거나 투여 용량이 변경된 병용약물이 있는 경우 선행/병용약물 페이지에 기록하여 주십시오. |

|                                                                                                                                                                                                                                                                  |
|------------------------------------------------------------------------------------------------------------------------------------------------------------------------------------------------------------------------------------------------------------------|
| <b>이상반응 확인</b>                                                                                                                                                                                                                                                   |
| <p>EOT 이후부터는 약물이상반응(adverse drug reaction, ADR)만 기재하여 주시기 바랍니다.<br/> 만약, EOT 방문 전 새로운 항암요법이 수행되는 경우에는 해당 시점 이후부터는 ADR만 수집합니다.)<br/> * 약물이상반응(adverse drug reaction, ADR)이란 임상시험용 의약품의 임의 용량에서 발생한 모든 유해하고 의도하지 않은 반응으로써 임상시험용 의약품과의 인과관계를 부정할 수 없는 경우를 말합니다.</p> |

|                                                                                                                                                                                                                                               |
|-----------------------------------------------------------------------------------------------------------------------------------------------------------------------------------------------------------------------------------------------|
| <b>새로운 항암요법 및 생존여부 확인</b>                                                                                                                                                                                                                     |
| <p>* 새로운 항암요법을 시행한 경우, 새로운 항암 요법 확인 페이지에 기록하여 주십시오.<br/> * 생존여부에 대한 정보를 추적 관찰하여 생존여부 확인 페이지에 기록하여 주십시오.<br/> * 추적이 필요한 AE 및/또는 ADR이 있는 경우, 본 기간을 통해 수집될 수 있습니다.<br/> * 해당하는 대상자가 있다면 종양반응 평가가 함께 진행될 수 있습니다. 평가진행 시, 종양평가 페이지에 기록하여 주십시오.</p> |

| EOS  | PROTOCOL    | SITE | SCREENING NO. |
|------|-------------|------|---------------|
| 방문일  | PHI-101-002 |      |               |
| 전자서명 |             |      |               |

| 방문일  |                                                            |
|------|------------------------------------------------------------|
| 방문일  | _____                                                      |
| 방문유형 | <input type="radio"/> 기관 방문<br><input type="radio"/> 전화 방문 |

| 선행/병용약물 확인                                                                       |
|----------------------------------------------------------------------------------|
| <p>지난 방문과 비교하였을 때, 새롭게 투여되었거나 투여 용량이 변경된 병용약물이 있는 경우 선행/병용약물 페이지에 기록하여 주십시오.</p> |

| 이상반응 확인                                                                                                                                                                                                                                                                               |
|---------------------------------------------------------------------------------------------------------------------------------------------------------------------------------------------------------------------------------------------------------------------------------------|
| <p>EOT 이후부터는 약물이상반응(adverse drug reaction, ADR)만 기재하여 주시기 바랍니다.<br/>           (만약, EOT 방문 전 새로운 항암요법이 수행되는 경우에는 해당 시점 이후부터는 ADR만 수집합니다.)<br/>           * 약물이상반응(adverse drug reaction, ADR)이란 임상시험용 의약품의 임의 용량에서 발생한 모든 유해하고 의도하지 않은 반응으로써 임상시험용 의약품과의 인과관계를 부정할 수 없는 경우를 말합니다.</p> |

| 새로운 항암요법 및 생존여부 확인                                                                                                                                                                                                                                                          |
|-----------------------------------------------------------------------------------------------------------------------------------------------------------------------------------------------------------------------------------------------------------------------------|
| <p>* 새로운 항암요법을 시행한 경우, 새로운 항암 요법 확인 페이지에 기록하여 주십시오.<br/>           * 생존여부에 대한 정보를 추적 관찰하여 생존여부 확인 페이지에 기록하여 주십시오.<br/>           * 추적이 필요한 AE 및/또는 ADR이 있는 경우, 본 기간을 통해 수집될 수 있습니다.<br/>           * 해당하는 대상자가 있다면 종양반응 평가가 함께 진행될 수 있습니다. 평가진행 시, 종양평가 페이지에 기록하여 주십시오.</p> |

|            |             |      |               |
|------------|-------------|------|---------------|
| PHI-101투여  | PROTOCOL    | SITE | SCREENING NO. |
| PHI-101 투여 | PHI-101-002 |      |               |
| 전자서명       |             |      |               |

**PHI-101 투여**

|    |                             |
|----|-----------------------------|
| ND | <input type="checkbox"/> ND |
|----|-----------------------------|

|            |       |
|------------|-------|
| 미실시인 경우 사유 | _____ |
|            | _____ |
|            | _____ |

| No | 주기                 | 계획된 1일 복용량 | 계획된 투여량 | 실제 투여량 | 복약순응도 |
|----|--------------------|------------|---------|--------|-------|
|    | Vomiting으로 미복용한 수량 | 투여 시작일     | 투여 종료일  | 중단 사유  |       |
| 1  | ___▼               | _ tab      | _ tab   | _ tab  | ___ % |
|    | _ tab              | _____      | _____   | ___▼   |       |

|          |                                                       |
|----------|-------------------------------------------------------|
| 주기       | 1주기, 2주기, 3주기, 4주기, 5주기, 6주기, 7주기, 8주기, 9주기, 10주기, 기타 |
| 주기_기타    | _____                                                 |
|          | _____                                                 |
|          | _____                                                 |
| 중단 사유    | 이상반응, 기타                                              |
| 중단 사유_기타 | _____                                                 |
|          | _____                                                 |
|          | _____                                                 |



| DLT 관찰 | PROTOCOL    | SITE | SCREENING NO. |
|--------|-------------|------|---------------|
| DLT 관찰 | PHI-101-002 |      |               |
| 전자서명   |             |      |               |

| DLT 관찰                             |                                                                                                                                                                                                                                                                                                                                                                                                                                                                                                                                                                                                                                                                                                                                                                                                                                                                                                                                                                                                                                                                                                                              |
|------------------------------------|------------------------------------------------------------------------------------------------------------------------------------------------------------------------------------------------------------------------------------------------------------------------------------------------------------------------------------------------------------------------------------------------------------------------------------------------------------------------------------------------------------------------------------------------------------------------------------------------------------------------------------------------------------------------------------------------------------------------------------------------------------------------------------------------------------------------------------------------------------------------------------------------------------------------------------------------------------------------------------------------------------------------------------------------------------------------------------------------------------------------------|
| DLT 평가 기간 동안 용량제한독성(DLT)이 발생하였습니까? | <input type="radio"/> 예<br><input type="radio"/> 아니오<br><input type="radio"/> 평가불가                                                                                                                                                                                                                                                                                                                                                                                                                                                                                                                                                                                                                                                                                                                                                                                                                                                                                                                                                                                                                                           |
| 혈액학적 독성                            | <input type="checkbox"/> Febrile neutropenia (grade $\geq$ 3)<br><input type="checkbox"/> Neutrophil count decreased (grade $\geq$ 3이면서, >7일인 경우)<br><input type="checkbox"/> WBC decreased (grade $\geq$ 3)<br><input type="checkbox"/> Platelet count decreased (grade $\geq$ 3 또는 grade < 3이면서, 수혈을 요하는 경우)<br><input type="checkbox"/> Anemia (grade $\geq$ 3)                                                                                                                                                                                                                                                                                                                                                                                                                                                                                                                                                                                                                                                                                                                                                           |
| 비혈액학적 독성                           | <input type="checkbox"/> ECG QT corrected interval prolonged (grade $\geq$ 3)<br><input type="checkbox"/> Nausea (grade $\geq$ 3이면서, 적절한 최적의 요법에도 불구하고 >7일인 경우)<br><input type="checkbox"/> Tumor pain (grade $\geq$ 3이면서, 적절한 최적의 요법에도 불구하고 >7일인 경우)<br><input type="checkbox"/> Vomiting (grade 3이면서, 적절한 최적의 요법에도 불구하고 >7일인 경우 또는 grade $\geq$ 4)<br><input type="checkbox"/> Diarrhea or associated electrolyte abnormalities (grade $\geq$ 3이면서, 적절한 최적의 요법에도 불구하고 >2일인 경우)<br><input type="checkbox"/> Fatigue (grade $\geq$ 3이면서, >7일인 경우)<br><input type="checkbox"/> Anorexia (grade $\geq$ 3이면서, >7일인 경우)<br><input type="checkbox"/> Hypophosphatemia, hypomagnesemia, or hypocalcemia (grade $\geq$ 3이면서, 적절한 최적의 요법에도 불구하고 >2일인 경우)<br><input type="checkbox"/> 무증상의 AST, ALT, ALP or GGT (grade $\geq$ 3이면서, >7일인 경우)<br><input type="checkbox"/> 간전이가 확인된 환자로서, 베이스라인 AST 또는 ALT $\geq$ 2.5~5 X ULN (AST 또는 ALT > 8배 X ULN 상승 >7일인 경우)<br><input type="checkbox"/> 간전이가 확인된 환자로서, 베이스라인 ALP $\geq$ 2~5 X ULN (ALP > 8배 X ULN 상승 >7일인 경우)<br><input type="checkbox"/> 1)~11)을 제외한 그 외 All ADR (grade $\geq$ 3) |
| 기타 독성                              | <input type="checkbox"/> ADR이면서, PHI-101의 투여중지(일시중단) 기간 > 4주인 경우                                                                                                                                                                                                                                                                                                                                                                                                                                                                                                                                                                                                                                                                                                                                                                                                                                                                                                                                                                                                                                                             |

|        |             |      |               |
|--------|-------------|------|---------------|
| DLT 관찰 | PROTOCOL    | SITE | SCREENING NO. |
| DLT 관찰 | PHI-101-002 |      |               |
| 전자서명   |             |      |               |

|         |                   |
|---------|-------------------|
| Comment | <hr/> <hr/> <hr/> |
|---------|-------------------|

|         |             |      |               |
|---------|-------------|------|---------------|
| 임상시험 종료 | PROTOCOL    | SITE | SCREENING NO. |
| 임상시험 종료 | PHI-101-002 |      |               |
| 전자서명    |             |      |               |

| 임상시험 종료(EOS)           |                                                                                                                                                                          |
|------------------------|--------------------------------------------------------------------------------------------------------------------------------------------------------------------------|
| 임상시험 종료(EOS)방문 여부      | <input type="radio"/> 예<br><input type="radio"/> 아니오                                                                                                                     |
| EOS 종료일/중단일            | _____                                                                                                                                                                    |
| 임상시험 종료(EOS)방문 미 실시 사유 | <input type="radio"/> 대상자의 사망<br><input type="radio"/> 추적관찰 실패<br><input type="radio"/> 대상자 또는 대상자 대리인의 동의철회<br><input type="radio"/> 기타 → <a href="#">Specify below</a> |
| 임상시험 종료 방문 미 실시 사유, 기타 | _____<br>_____<br>_____                                                                                                                                                  |

|          |             |      |               |
|----------|-------------|------|---------------|
| 시험책임자 서명 | PROTOCOL    | SITE | SCREENING NO. |
| 시험책임자 서명 | PHI-101-002 |      |               |
| 전자서명     |             |      |               |

|                                                |       |
|------------------------------------------------|-------|
| <b>시험책임자 서명</b>                                |       |
| 본 증례기록서의 모든 항목을 검토하였으며 빠짐없이 정확하게 기재하였음을 확인합니다. |       |
| 시험책임자 서명                                       | _____ |
| 서명일                                            | _____ |

|       |             |      |               |
|-------|-------------|------|---------------|
| FU2-1 | PROTOCOL    | SITE | SCREENING NO. |
| 방문일   | PHI-101-002 |      |               |
| 전자서명  |             |      |               |

|            |                                                            |
|------------|------------------------------------------------------------|
| <b>방문일</b> |                                                            |
| 방문일        | _____                                                      |
| 방문유형       | <input type="radio"/> 기관 방문<br><input type="radio"/> 전화 방문 |

|                                                                           |
|---------------------------------------------------------------------------|
| <b>선행/병용약물 확인</b>                                                         |
| 지난 방문과 비교하였을 때, 새롭게 투여되었거나 투여 용량이 변경된 병용약물이 있는 경우 선행/병용약물 페이지에 기록하여 주십시오. |

|                                                                                                                                                                                                                                                                  |
|------------------------------------------------------------------------------------------------------------------------------------------------------------------------------------------------------------------------------------------------------------------|
| <b>이상반응 확인</b>                                                                                                                                                                                                                                                   |
| <p>EOT 이후부터는 약물이상반응(adverse drug reaction, ADR)만 기재하여 주시기 바랍니다.<br/> 만약, EOT 방문 전 새로운 항암요법이 수행되는 경우에는 해당 시점 이후부터는 ADR만 수집합니다.)<br/> * 약물이상반응(adverse drug reaction, ADR)이란 임상시험용 의약품의 임의 용량에서 발생한 모든 유해하고 의도하지 않은 반응으로써 임상시험용 의약품과의 인과관계를 부정할 수 없는 경우를 말합니다.</p> |

|                                                                                                                                                                                                                                                                                                      |
|------------------------------------------------------------------------------------------------------------------------------------------------------------------------------------------------------------------------------------------------------------------------------------------------------|
| <b>새로운 항암요법 및 생존여부 확인</b>                                                                                                                                                                                                                                                                            |
| <ul style="list-style-type: none"> <li>* 새로운 항암요법을 시행한 경우, 새로운 항암 요법 확인 페이지에 기록하여 주십시오.</li> <li>* 생존여부에 대한 정보를 추적 관찰하여 생존여부 확인 페이지에 기록하여 주십시오.</li> <li>* 추적이 필요한 AE 및/또는 ADR이 있는 경우, 본 기간을 통해 수집될 수 있습니다.</li> <li>* 해당하는 대상자가 있다면 종양반응 평가가 함께 진행될 수 있습니다. 평가진행 시, 종양평가 페이지에 기록하여 주십시오.</li> </ul> |

|           |             |      |               |
|-----------|-------------|------|---------------|
| CA 125 검사 | PROTOCOL    | SITE | SCREENING NO. |
| CA 125 검사 | PHI-101-002 |      |               |
| 전자서명      |             |      |               |

### CA 125 검사

|    |                             |
|----|-----------------------------|
| ND | <input type="checkbox"/> ND |
|----|-----------------------------|

\* CA 125 검사 일정은 달력일(calendar day)기준으로 C1D1 이후 8주마다 계획되며, 주기 시작 지연 등에 따른 조정을 해서는 안됩니다.  
 CA 125 검사일은 계획된 검사일의 ±1주일 내에서 대상자의 병원 방문일정에 맞춰 방문 가능합니다.  
 \*베이스라인(C1D1)을 기준으로 28일 이내 수행된 검사 내용이 없는 경우, 스크리닝 시 수행합니다.  
 \*EOT 방문 전 4주(28일) 이내 확보된 검사가 있다면, EOT 방문의 검사는 생략 가능합니다.

| No | ND                       | 미 실시 사유                 | 검진일   | 결과    | 정상 여부         | 임상적 유의성   |
|----|--------------------------|-------------------------|-------|-------|---------------|-----------|
| 1  | <input type="checkbox"/> | _____<br>_____<br>_____ | _____ | _____ | ○ 정상<br>○ 비정상 | ○ 예 ○ 아니오 |

|      |             |      |               |
|------|-------------|------|---------------|
| 종양평가 | PROTOCOL    | SITE | SCREENING NO. |
| 종양평가 | PHI-101-002 |      |               |
| 전자서명 |             |      |               |

**종양평가**

ND  ND

\* 베이스라인(C1D1)을 기준으로 28일 이내 수행된 CT scan (abdomen, pelvis, chest 등) 또는 MRI 검사 내용이 없는 경우, 스크리닝 시 수행합니다.  
 \* CT scan 조영제에 대한 과민반응의 이력 또는 과민반응이 있는 경우, 시험자 판단에 따라 MRI로 수행될 수 있습니다.  
 \* 매 평가 시점과 베이스라인(C1D1)에서의 영상검사 방법은 동일해야 합니다.  
 \* 종양반응 평가 일정은 달력일(calendar day)기준으로 C1D1 이후 8주마다 계획되며, 주기 시작 지연 등에 따른 조정을 해서는 안됩니다.  
 CT scan(또는 MRI) 측정일은 계획된 종양반응 평가일의 ±1주일 내에서 대상자의 병원 방문일정에 맞춰 방문 가능합니다.  
 \* EOT 방문 전 4주(28일) 이내 확보된 검사가 있다면, EOT 방문의 검사는 생략 가능합니다.  
 \* EOT 방문 시까지 PD가 확인되지 않은 대상자는 'EOS 시점, PD 확인 시점, 새로운 항암요법의 시작, 동의철회 또는 사망' 중 선행되는 사건이 확인될 때까지 8주(±1주)마다 종양반응 평가를 실시합니다.

| No | ND | Target Lesion Response by RECIST | Non-target Lesion Response by RECIST | New Lesion | Overall Response by RECIST |
|----|----|----------------------------------|--------------------------------------|------------|----------------------------|
|    |    |                                  |                                      |            |                            |

|      |             |      |               |
|------|-------------|------|---------------|
| 종양평가 | PROTOCOL    | SITE | SCREENING NO. |
| 종양평가 | PHI-101-002 |      |               |
| 전자서명 |             |      |               |

**종양평가 #1**

|                     |                             |
|---------------------|-----------------------------|
| No                  | 1                           |
| ND                  | <input type="checkbox"/> ND |
| 미실시인 경우 사유          | _____<br>_____<br>_____     |
| Date of Measurement | _____                       |
| Method              | ____▼                       |

|              |                         |
|--------------|-------------------------|
| Method       | CT , MRI , Other        |
| Method_Other | _____<br>_____<br>_____ |

**Target Lesion**

|                  |                               |
|------------------|-------------------------------|
| None             | <input type="checkbox"/> None |
| Target Lesion 개수 | ____▼                         |

|                  |                   |
|------------------|-------------------|
| Target Lesion 개수 | 1 , 2 , 3 , 4 , 5 |
|------------------|-------------------|

| Lesion | Organ                   | Detailed Location       | Lymph Node                                         | Size(mm) | Comment                 |
|--------|-------------------------|-------------------------|----------------------------------------------------|----------|-------------------------|
| 1      | _____<br>_____<br>_____ | _____<br>_____<br>_____ | <input type="radio"/> Yes <input type="radio"/> No | _____    | _____<br>_____<br>_____ |
| 2      | _____<br>_____<br>_____ | _____<br>_____<br>_____ | <input type="radio"/> Yes <input type="radio"/> No | _____    | _____<br>_____<br>_____ |



|      |             |      |               |
|------|-------------|------|---------------|
| 종양평가 | PROTOCOL    | SITE | SCREENING NO. |
| 종양평가 | PHI-101-002 |      |               |
| 전자서명 |             |      |               |

| Lesion | Organ | Detailed Location | Lymph Node                                         | Size(mm) | Comment |
|--------|-------|-------------------|----------------------------------------------------|----------|---------|
| 3      | _____ | _____             | <input type="radio"/> Yes <input type="radio"/> No | _____    | _____   |
| 4      | _____ | _____             | <input type="radio"/> Yes <input type="radio"/> No | _____    | _____   |
| 5      | _____ | _____             | <input type="radio"/> Yes <input type="radio"/> No | _____    | _____   |

|                                  |                                                                                                                              |
|----------------------------------|------------------------------------------------------------------------------------------------------------------------------|
| Sum of Size(mm)[자동계산]            | _____                                                                                                                        |
| Change from Baseline[자동계산]       | _____ %                                                                                                                      |
| Change from Nadir[자동계산]          | _____ %                                                                                                                      |
| Target Lesion Response by RECIST | <input type="radio"/> CR <input type="radio"/> PR <input type="radio"/> SD <input type="radio"/> PD <input type="radio"/> NE |
| <b>Non-target Lesion</b>         |                                                                                                                              |
| None                             | <input type="checkbox"/> None                                                                                                |
| Non-Target Lesion 개수             | _____▼                                                                                                                       |

|                      |               |
|----------------------|---------------|
| Non-Target Lesion 개수 | 1, 2, 3, 4, 5 |
|----------------------|---------------|

| Lesion | Organ | Detailed Location | Lymph Node                                         | Tumor Status | Comment |
|--------|-------|-------------------|----------------------------------------------------|--------------|---------|
| 1      | _____ | _____             | <input type="radio"/> Yes <input type="radio"/> No | _____▼       | _____   |

|      |             |      |               |
|------|-------------|------|---------------|
| 종양평가 | PROTOCOL    | SITE | SCREENING NO. |
| 종양평가 | PHI-101-002 |      |               |
| 전자서명 |             |      |               |

| Lesion | Organ | Detailed Location | Lymph Node                                         | Tumor Status | Comment |
|--------|-------|-------------------|----------------------------------------------------|--------------|---------|
| 2      | _____ | _____             | <input type="radio"/> Yes <input type="radio"/> No | ____▼        | _____   |
| 3      | _____ | _____             | <input type="radio"/> Yes <input type="radio"/> No | ____▼        | _____   |
| 4      | _____ | _____             | <input type="radio"/> Yes <input type="radio"/> No | ____▼        | _____   |
| 5      | _____ | _____             | <input type="radio"/> Yes <input type="radio"/> No | ____▼        | _____   |

|              |                                            |
|--------------|--------------------------------------------|
| Tumor Status | Present , Absent , Unequivocal Progression |
| Tumor Status | Present , Absent , Unequivocal Progression |
| Tumor Status | Present , Absent , Unequivocal Progression |
| Tumor Status | Present , Absent , Unequivocal Progression |
| Tumor Status | Present , Absent , Unequivocal Progression |

|                                      |                                                                                                                |
|--------------------------------------|----------------------------------------------------------------------------------------------------------------|
| Non-target Lesion Response by RECIST | <input type="radio"/> CR <input type="radio"/> Non-CR/Non-PD <input type="radio"/> PD <input type="radio"/> NE |
|--------------------------------------|----------------------------------------------------------------------------------------------------------------|

|                   |                                                                           |
|-------------------|---------------------------------------------------------------------------|
| <b>New Lesion</b> |                                                                           |
| New Lesion        | <input type="radio"/> 예 → <u>아래에 기록하십시오.</u><br><input type="radio"/> 아니오 |

‘예’ 일 경우 전반적 반응은 질병의 진행(PD)에 해당합니다.

| Lesion | Organ | Detailed Location | Lymph Node                                         | Comment |
|--------|-------|-------------------|----------------------------------------------------|---------|
| 1      |       |                   | <input type="radio"/> Yes <input type="radio"/> No |         |

|      |             |      |               |
|------|-------------|------|---------------|
| 종양평가 | PROTOCOL    | SITE | SCREENING NO. |
| 종양평가 | PHI-101-002 |      |               |
| 전자서명 |             |      |               |

| Lesion | Organ | Detailed Location | Lymph Node | Comment |
|--------|-------|-------------------|------------|---------|
|        | _____ | _____             |            | _____   |
|        | _____ | _____             |            | _____   |
|        | _____ | _____             |            | _____   |

**Overall Response - RECIST**

|                            |                                                                                                                                                                                                                                                                      |
|----------------------------|----------------------------------------------------------------------------------------------------------------------------------------------------------------------------------------------------------------------------------------------------------------------|
| Date of Evaluation         | _____                                                                                                                                                                                                                                                                |
| Overall Response by RECIST | <input type="radio"/> Complete response (CR)<br><input type="radio"/> Partial response (PR)<br><input type="radio"/> Stable disease (SD)<br><input type="radio"/> Progression (PD)<br><input type="radio"/> Not Evaluable(NE) → <a href="#">Specify reason below</a> |
| NE reason                  | _____<br>_____<br>_____                                                                                                                                                                                                                                              |

**Best Overall Response - RECIST**

|                                 |                                                                                                                                                                                                                                                                      |
|---------------------------------|----------------------------------------------------------------------------------------------------------------------------------------------------------------------------------------------------------------------------------------------------------------------|
| NA                              | <input type="checkbox"/> NA                                                                                                                                                                                                                                          |
| Date of Evaluation              | _____                                                                                                                                                                                                                                                                |
| Best Overall Response by RECIST | <input type="radio"/> Complete response (CR)<br><input type="radio"/> Partial response (PR)<br><input type="radio"/> Stable disease (SD)<br><input type="radio"/> Progression (PD)<br><input type="radio"/> Not Evaluable(NE) → <a href="#">Specify reason below</a> |
| NE reason                       | _____<br>_____<br>_____                                                                                                                                                                                                                                              |

|      |             |      |               |
|------|-------------|------|---------------|
| 이상반응 | PROTOCOL    | SITE | SCREENING NO. |
| 이상반응 | PHI-101-002 |      |               |
| 전자서명 |             |      |               |

### 이상반응

None  None

\* 이상반응은 동의서 취득 이후부터 PHI-101의 마지막 투여일(EOT)까지 기재하여 주시기 바랍니다.  
 \* EOT 이후부터는 ADR만 기재하여 주시기 바랍니다. (만약, EOT 방문 전 새로운 항암요법이 수행되는 경우에는 해당 시점 이후부터는 ADR만 수집합니다)  
 \* 이상반응으로 인해 PHI-101투여가 변경/중단되는 경우, [PHI-101 투여] 페이지의 [중단 사유]에 해당 내용을 함께 기재하여 주시기 바랍니다.  
 \* 치료여부에 약물/비약물 치료를 체크하는 경우, [선행/병용요법 (약물)] 혹은 [선행/병용요법 (비약물)] 페이지에 해당 치료 내용을 함께 기재하여 주시기 바랍니다.

| No | 이상반응명 | TEAE                     | 발생일   | 중증도    | 결과     | 소실일   | SAE    | 인과관계   | 관련조치   | 치료여부   |
|----|-------|--------------------------|-------|--------|--------|-------|--------|--------|--------|--------|
| 1  | _____ | <input type="checkbox"/> | _____ | _____▼ | _____▼ | _____ | _____▼ | _____▼ | _____▼ | _____▼ |

|       |                                                                                                                                       |
|-------|---------------------------------------------------------------------------------------------------------------------------------------|
| SAE   | SAE 아님, SAE, 사망, SAE, 생명을 위협, SAE, 입원 또는 입원 기간의 연장, SAE, 지속적 또는 의미 있는 불구나 기능저하, SAE, 선천성 기형 또는 이상 초래, SAE, 그 밖에 의학적으로 중요한 상황이 발생하는 사례 |
| 인과관계  | 관련성이 명백함, 관련성이 많음, 관련성이 의심됨, 관련성이 적음, 평가 불가능, 관련성이 없음                                                                                 |
| 관련 조치 | 일시중단, 영구중단, 용량감량, 용량증량, 용량변화 없음, 알 수 없음, 해당사항 없음                                                                                      |
| 치료 여부 | 약물 치료, 비약물 치료, 약물치료 및 비약물 치료, 처치를 시행하지 않음                                                                                             |
| 중증도   | Grade1(경증), Grade2(중등증), Grade3(중증), Grade4(생명을 위협), Grade5(사망)                                                                       |
| 결과    | 회복(해결)됨, 회복(해결)중임, 회복(해결)되지 않음, 회복(해결)되었으나 후유증이 남음, 사망, 알 수 없음                                                                        |

|         |             |      |               |
|---------|-------------|------|---------------|
| 선행/병용약물 | PROTOCOL    | SITE | SCREENING NO. |
| 선행/병용약물 | PHI-101-002 |      |               |
| 전자서명    |             |      |               |

**선행/병용약물**

None  None

\* Screen방문 기준 24주 이내의 약물치료 기록을 모두 기재하십시오.  
(단, 선정/제외 기준과 관련된 요법의 경우, 계획서에 따라 검토되어야 하는 기간에 준하여 모두 조사한다.)  
\* 용량, 단위, 투여목적 등을 정확히 기재하십시오.  
\* 해당 약물이 투여 중인 경우 '지속중'에 체크하십시오.  
\* 현재 진행중인 병력 혹은 이상반응으로 인한 약제 투여일 경우 해당 병력 및 이상반응을 투여목적에 기재하십시오.  
\* EOT 이전 투여된 새로운 항암요법이 있는 경우 새로운 항암 요법 확인 페이지에 기재하십시오.

| No | 약제명    | 1일 투여량                   | 단위     | 경로     |
|----|--------|--------------------------|--------|--------|
|    | 투여 시작일 | 지속중                      | 투여 종료일 | 투여목적   |
| 1  | _____  | _____                    | _____  | _____  |
|    | _____  | <input type="checkbox"/> | _____  | _____▼ |

|           |                         |
|-----------|-------------------------|
| 투여목적      | 병력 , 이상반응 , 기타          |
| 투여목적_병력   | _____<br>_____<br>_____ |
| 투여목적_이상반응 | _____<br>_____<br>_____ |
| 투여목적_기타   | _____<br>_____<br>_____ |

|         |             |      |               |
|---------|-------------|------|---------------|
| 선행/병용요법 | PROTOCOL    | SITE | SCREENING NO. |
| 선행/병용요법 | PHI-101-002 |      |               |
| 전자서명    |             |      |               |

**선행/병용요법**

None  None

\* Screen 방문 기준 24주 이내의 비약물치료 기록을 모두 기재하십시오.  
(단, 선정/제외 기준과 관련된 요법의 경우, 계획서에 따라 검토되어야 하는 기간에 준하여 모두 조사하십시오.)  
\* 해당 치료를 받는 중인 경우 '지속중'에 체크하십시오.  
\* 현재 진행중인 병력 혹은 이상반응으로 인한 치료일 경우 해당 병력 및 이상반응을 투여목적에 기재하십시오.  
\* 임상약 투여 이후 시행된 방사선요법이 있는 경우 본 페이지에 기재하며, 치료명에 방사선 조사 부위를 함께 기재하십시오.

| No | 치료명   | 치료시작일 | 지속중                      | 치료종료일 | 치료목적   |
|----|-------|-------|--------------------------|-------|--------|
| 1  | _____ | _____ | <input type="checkbox"/> | _____ | _____▼ |
|    | _____ |       |                          |       |        |
|    | _____ |       |                          |       |        |

|           |              |
|-----------|--------------|
| 치료목적      | 병력, 이상반응, 기타 |
| 치료목적_병력   | _____        |
| 치료목적_이상반응 | _____        |
| 치료목적_기타   | _____        |

|              |             |      |               |
|--------------|-------------|------|---------------|
| 새로운 항암요법 확인  | PROTOCOL    | SITE | SCREENING NO. |
| 새로운 항암 요법 확인 | PHI-101-002 |      |               |
| 전자서명         |             |      |               |

**새로운 항암 요법 확인**

|                    |                                                                                      |
|--------------------|--------------------------------------------------------------------------------------|
| 새로운 항암요법을 시행하였습니까? | <input type="radio"/> 예<br><input type="radio"/> 아니오<br><input type="radio"/> 알 수 없음 |
|--------------------|--------------------------------------------------------------------------------------|

|                 |                   |
|-----------------|-------------------|
| '알 수 없음'인 경우 사유 | <hr/> <hr/> <hr/> |
|-----------------|-------------------|

| No | 시작시점                                                       | 새로운 항암요법명         | 시작일   |
|----|------------------------------------------------------------|-------------------|-------|
| 1  | <input type="radio"/> EOT이전<br><input type="radio"/> EOT이후 | <hr/> <hr/> <hr/> | <hr/> |

|         |             |      |               |
|---------|-------------|------|---------------|
| 생존여부 확인 | PROTOCOL    | SITE | SCREENING NO. |
| 생존여부 확인 | PHI-101-002 |      |               |
| 전자서명    |             |      |               |

| 생존여부 확인 |                                                                          |                               |                                                                                      |                         |       |                                                                                        |                         |
|---------|--------------------------------------------------------------------------|-------------------------------|--------------------------------------------------------------------------------------|-------------------------|-------|----------------------------------------------------------------------------------------|-------------------------|
| None    |                                                                          | <input type="checkbox"/> None |                                                                                      |                         |       |                                                                                        |                         |
| No      | 확인 시점                                                                    | 날짜                            | 생존여부                                                                                 | 알 수 없음, 사유              | 사망일   | 사망원인                                                                                   | 사망원인, 기타                |
| 1       | <input type="radio"/> EOT~EOS사이 매8주<br><input type="radio"/> EOS이후 매 12주 | _____                         | <input type="radio"/> 예<br><input type="radio"/> 아니오<br><input type="radio"/> 알 수 없음 | _____<br>_____<br>_____ | _____ | <input type="radio"/> 질병의 진행<br><input type="radio"/> 이상반응<br><input type="radio"/> 기타 | _____<br>_____<br>_____ |



|         |             |      |               |
|---------|-------------|------|---------------|
| 임상시험 종료 | PROTOCOL    | SITE | SCREENING NO. |
| 임상시험 종료 | PHI-101-002 |      |               |
| 전자서명    |             |      |               |

| 임상시험 종료(FU2)                      |                                                                                                                                                                          |
|-----------------------------------|--------------------------------------------------------------------------------------------------------------------------------------------------------------------------|
| 임상시험 종료(EOS)방문 이후 1년동안 추적관찰 종료 여부 | <input type="radio"/> 예<br><input type="radio"/> 아니오                                                                                                                     |
| 추적관찰종료/중단일                        | _____                                                                                                                                                                    |
| 추적관찰 종료 중단 사유                     | <input type="radio"/> 대상자의 사망<br><input type="radio"/> 추적관찰 실패<br><input type="radio"/> 대상자 또는 대상자 대리인의 동의철회<br><input type="radio"/> 기타 → <a href="#">Specify below</a> |
| 추적관찰 종료 중단 사유, 기타                 | _____<br>_____<br>_____                                                                                                                                                  |

|          |             |      |               |
|----------|-------------|------|---------------|
| 시험책임자 서명 | PROTOCOL    | SITE | SCREENING NO. |
| 시험책임자 서명 | PHI-101-002 |      |               |
| 전자서명     |             |      |               |

|                                                |       |
|------------------------------------------------|-------|
| <b>시험책임자 서명</b>                                |       |
| 본 증례기록서의 모든 항목을 검토하였으며 빠짐없이 정확하게 기재하였음을 확인합니다. |       |
| 시험책임자 서명                                       | _____ |
| 서명일                                            | _____ |
